# Supplementary material
Source: Elsevier journal article supplement (https://www.sciencedirect.com/science/article/pii/S0009739X20301135)
Supplement: mmc1 [file S0009739X20301135:mmc1.doc]

# DOCUMENTO DE CONSENSO DE LA SOCIEDAD ESPAÑOLA DE ENFERMEDADES INFECCIOSAS Y MICROBIOLOGÍA CLÍNICA (SEIMC) Y DE LA ASOCIACIÓN ESPAÑOLA DE CIRUJANOS (AEC) EN PROFILAXIS ANTIBIÓTICA EN CIRUGÍA

**COORDINADORES**: Mª Dolores del Toro López (Hospital Universitario Virgen Macarena, Sevilla), Josep M Badia (Hospital General de Granollers. Universitat Internacional de Catalunya).

**AUTORES** (orden alfabético): Javier Arias Díaz (Hospital Clínico San Carlos), José M Balibrea del Castillo (Hospital Clínic de Barcelona), Natividad Benito (Hospital de la Santa Creu i Sant Pau), Andrés Canut Blasco (Hospital Universitario de Álava), Erika Esteve (Hospital Universitari del Mar), Juan Pablo Horcajada (Hospital Universitari del Mar), Juan Diego Ruiz Mesa (Hospital Regional de Málaga), Alba Manuel Vázquez (Hospital de Guadalajara), Cristóbal Muñoz Casares (Hospital Virgen del Rocío de Sevilla), Jose Luis del Pozo (Clínica Universidad de Navarra), Miquel Pujol (Hospital Universitari Bellvitge), Melchor Riera (Hospital Son Espases), Jaime Jimeno (Hospital Marqués de Valdecilla), Inés Rubio (Hospital Universitario La Paz), Jaime Ruiz-Tovar Polo (Hospital Universitario Rey Juan Carlos), Alejandro Serrablo (Hospital Universitario Miguel Servet), Alex Soriano (Hospital Clínic de Barcelona).

# PATROCINIO:

## La presente investigación ha sido patrocinada por la SEIMC y no ha recibido ayudas específicas provenientes de agencias del sector público, sector comercial u otras entidades sin ánimo de lucro.

## AGRADECIMIENTOS

## Los autores agradecen a Antonio Gutierrez-Pizarraya su contribución en el soporte bibliográfico de este documento, y a la SEIMC y la AEC por depositar su confianza para la elaboración del manuscrito.

## DECLARACIÓN DE CONFLICTO DE INTERESES

## Los autores declaran no tener ningún conflicto de interés relacionado con este manuscrito.

## Índice

1. Introducción
2. Metodología
3. Principios básicos de la profilaxis
   1. ¿Cuándo está indicada la profilaxis?
   2. ¿Cuál es el antimicrobiano más adecuado?
   3. ¿Cuál es el momento óptimo para administrar la profilaxis?
   4. ¿Cuál es la dosis adecuada?
   5. ¿Hay que modificar la dosis en el paciente obeso?
   6. ¿Es necesario repetir la dosis durante la cirugía?
   7. ¿Cuál es la duración más adecuada?
4. ¿Cuáles son los efectos adversos de la profilaxis antibiótica en cirugía?
   1. ¿Qué debemos hacer ante un paciente que refiera alergia a los beta-lactámicos?
   2. Diarrea asociada a los antibióticos e infección por *Clostridium difficile*.
   3. Incremento de la resistencia a los antibióticos
   4. Incremento de fracaso renal agudo
   5. ¿Hay que cambiar la profilaxis en los pacientes colonizados por microorganismos multirresistentes?
5. Recomendaciones según tipo de cirugía
   1. Generalidades en cirugía limpia
   2. Cirugía plástica y dermatológica.
   3. Cirugía de la hernia
   4. Cirugía de mama y cirugía oncoplástica
   5. Cirugía cardíaca y vascular
      1. By-pass aortocoronario y recambio valvular
      2. Inserción de marcapasos y desfibriladores
      3. Implantación de catéteres de acceso vascular central
      4. Cirugía vascular periférica (percutánea y abierta)
   6. Cirugía oftálmica
   7. Procedimientos neuroquirúrgicos
      1. Craneotomía
      2. Colocación de derivación ventrículo-peritoneal o ventrículo-auricular y drenaje ventricular externo.
      3. Colocación de sensor de presión intracraneal
      4. Cirugía a través de senos paranasales o faringe
   8. Cirugía de cabeza y cuello
      1. Cirugía limpia: cirugía de glándulas salivares, tiroidectomía, paratiroidectomía, vaciamiento ganglionar, sin entrada en mucosas oral, respiratoria o digestiva.
      2. Cirugía limpia-contaminada: amigdalectomía, adenoidectomía, laringuectomía, traqueotomía, y cualquier otra cirugía en la que se realice incisión de la mucosa faringo-laríngea.
      3. Cirugía de senos paranasales y de oído medio
      4. Cirugía maxilo-facial
      5. Procedimientos odontológicos
   9. Cirugía traumatológica y ortopédica
      1. Reducción de fractura cerrada sin material de osteosíntesis y otra cirugía limpia ortopédica sin instrumentación.
      2. Reducción de fractura cerrada con material de osteosíntesis.
      3. Intervención de fractura abierta
      4. Retirada de implantes ortopédicos utilizados como tratamiento de fracturas.
      5. Artroplastias (PTC, PTR, PPC, primarias y de revisión)
      6. Laminectomías y discectomías con o sin instrumentación
      7. Amputación de miembros
   10. Cirugía torácica
       1. Cirugía torácica mayor y mínimamente invasiva
       2. Colocación de tubo torácico, traumatismo penetrante
   11. Cirugía esófago-gastro-duodenal
       1. Con rotura de mucosa
       2. Sin rotura de mucosa
       3. Implantación de gastrostomía percutánea endoscópica
   12. Cirugía bariátrica
   13. Cirugía de intestino delgado
   14. Otras cirugías digestivas
       1. Esplenectomía
       2. Traumatismo penetrante de abdomen
   15. Apendicectomía
   16. Cirugía colorrectal
   17. Cirugía hepato-bilio-pancreática
       1. Colecistectomía y cirugía biliar
       2. Cirugía hepática
       3. Cirugía pancreática
   18. Cirugía peritoneal avanzada-Peritonectomía
   19. Cirugía urológica
       1. Cistoscopia simple (sin manipulación)
       2. Resección transuretral de próstata
       3. Resección transuretral de tumor vesical
       4. Inserción/retirada de stent ureteral. Cirugía endourológica ambulatoria
       5. Ureteroscopia con extracción de cálculos
       6. Litotricia extracorpórea
       7. Nefrectomía abierta y laparoscópica
       8. Nefrolititomía percutánea
       9. Prostatectomía simple (vía abdominal y laparoscópica)
       10. Cistectomía radical con entrada en tracto intestinal. Derivaciones urinarias
       11. Biopsia transrectal de próstata
       12. Cirugía limpia: testicular, fimosis y otras cirugías de pene sin implantación de prótesis, biopsia renal abierta
       13. Implantación de prótesis de pene
   20. Cirugía ginecológica
       1. Cesárea
       2. Histerectomía
       3. Anexectomía, ligadura de trompas
       4. Aborto inducido, legrados puerperales
       5. Reparación de desgarros vaginales postparto (III/IV)
   21. Trasplantes
       1. Trasplante renal
       2. Trasplante de páncreas y combinado páncreas/riñón
       3. Trasplante de hígado
       4. Trasplante de intestino delgado
       5. Trasplante de corazón, pulmón y combinado corazón-pulmón
6. Conclusiones
7. **Introducción**

***Necesidad del documento.*** A pesar de los avances en su conocimiento y prevención, la infección de localización quirúrgica (ILQ) continúa siendo la segunda causa de infección relacionada con los cuidados sanitarios en los países europeos1,2. Se asocia a un incremento de los costes sanitarios, alargamiento de las estancias hospitalarias, reingresos, reintervenciones y aumento de la mortalidad, además tiene un impacto negativo en la salud física y mental de los pacientes3. La prevención de la ILQ se lleva a cabo mediante la aplicación de forma conjunta de una serie de medidas que han demostrado ser eficaces y que abarcan el periodo preoperatorio, el peri-operatorio y el postoperatorio, de ellas, la profilaxis antibiótica ha mostrado ser una de las más eficaces, pero su efectividad se ve tremendamente reducida cuando no va acompañada del resto de medidas4.

Entre las líneas prioritarias de la OMS dirigidas a salvar vidas, reducir costes y evitar la diseminación de microorganismos multirresistentes, se encuentra la prevención de la ILQ. En noviembre de 2016 la OMS publicó 29 recomendaciones basadas en la evidencia para que sirviesen de guía y pudieran aplicarse a nivel internacional1,2; de ellas, 4 se referían al uso adecuado de la profilaxis antimicrobiana: 1) administrar el antibiótico antes de la cirugía si está recomendado; 2) hacerlo en los 120 minutos anteriores a la incisión (según la vida media del fármaco); 3) no mantener los antibióticos aunque persistan los drenajes; 4) no mantener la profilaxis después de la finalización de la cirugía. En 2017, en la actualización de las recomendaciones para la prevención de la ILQ, los CDC recomendaban5: a) administrar la profilaxis antibiótica sólo en aquellas cirugías en las que estuviera indicada; b) en cesáreas, infundir el antibiótico antes de la incisión; y c) no mantener la profilaxis tras el cierre de la herida5. Sin embargo, debido a la insuficiente evidencia, no hicieron recomendaciones sobre el momento de administración de la profilaxis antes de la cirugía, sobre la dosificación en pacientes obesos o la re-dosificación durante la cirugía5.

A pesar de las recomendaciones y de ser una de las medidas más eficaces en la prevención de la ILQ, la profilaxis antibiótica quirúrgica continúa administrándose de forma inadecuada en muchos hospitales, bien porque no se administra según las guías o en el momento adecuado, o bien porque se prolonga en el tiempo6,7. Recientemente, los ECDC han publicado la encuesta de prevalencia de consumo de antibióticos, y la profilaxis quirúrgica supuso el 24,9% de las prescripciones, y más de la mitad (10.741/19.798, 54,2%) se prescribieron por más de 24 horas (rango por países 19,8–95%, en España sobre el 40%)8. Como se comentará a lo largo del documento, la administración de la profilaxis no ajustada a las guías locales ni en el momento adecuado puede incrementar el riesgo de ILQ, pero, además, su administración inadecuada incrementa el riesgo de resistencias bacterianas y toxicidades. Este es sin duda un punto importante dado el grave problema actual de resistencias bacterianas, y que se ha convertido en objetivo prioritario de las autoridades sanitarias.

Por otro lado, el avance y la aparición de nuevas técnicas quirúrgicas, el incremento del número de trasplantes, y la emergencia y expansión de microorganismos multirresistentes, obliga a revisar las pautas de profilaxis antibiótica utilizada en décadas anteriores.

El último documento de consenso español de profilaxis quirúrgica se publicó en 2002 en EIMC. La Sociedad Española de Enfermedades Infecciosas (SEIMC), conjuntamente con la Asociación Española de Cirujanos (AEC) ha pretendido revisar y actualizar las recomendaciones de profilaxis antibiótica quirúrgica vigente y adaptarlas a cada tipo de intervención quirúrgica y a la epidemiología actual. Las recomendaciones realizadas en esta guía están basadas en la evidencia científica. Cuando no ha sido posible encontrar evidencia de calidad, el comité editorial, junto con los coordinadores y autores de la guía, han preferido dar una recomendación basada en los conocimientos acerca de la etiopatogenia y factores de riesgos de la ILQ, en estudios farmacocinéticos de los antibióticos utilizados en profilaxis y en la experiencia clínica.

Este Documento de Consenso pretende proporcionar unas directrices que permitan un manejo estandarizado de la profilaxis antibiótica en la cirugía electiva, con un uso racional, seguro y efectivo de los antimicrobianos para la prevención de las infecciones de localización quirúrgica.

***Alcance y ámbito del documento.*** Este documento se centra exclusivamente en la profilaxis antibiótica quirúrgica y no abarcará otras medidas que se han demostrado eficaces en la prevención de la infección de la herida quirúrgica, como la descolonización de *Staphylococcus aureus* o la antisepsia de la piel. Se dan unas recomendaciones generales de profilaxis antibiótica y las indicaciones específicas por tipos de cirugías con los grados de recomendación según la evidencia científica. Se facilitan los antimicrobianos utilizados en las diferentes cirugías con las dosis recomendadas, aunque se excluyen algunos que el comité ha considerado no adecuados para la profilaxis por la elevada tasa de resistencias actuales, amplio espectro, impacto ecológico o capacidad de inducir resistencias (p.e. quinolonas o ertapenem). También se hacen recomendaciones acerca de la duración, la profilaxis en huéspedes especiales, y en situación epidemiológica de multirresistencia.

Una de las limitaciones más importantes de este documento es que no siempre se pueden dar recomendaciones con alto grado de evidencia debido al diseño de la mayoría de los trabajos, la escasez de estudios comparativos con placebo o diferentes antimicrobianos que estudien la eficacia de la profilaxis antibiótica, y a la baja incidencia de infecciones en la mayoría de los procedimientos. En ocasiones se dan recomendaciones por inferencia de la evidencia en otras cirugías en la misma región anatómica y con microbiología similar. También, aunque se dan recomendaciones sobre el tipo de antibiótico, la elección de este en cada centro debe adaptarse a la epidemiología local y a los programas de optimización del uso de antimicrobianos. Por otro lado, no es posible hacer indicaciones generales en situaciones complejas, como pacientes sometidos a múltiples cirugías y que han recibido diversos antimicrobianos, donde habrá que individualizar la profilaxis dependiendo del riesgo de infección y del estado de colonización del paciente.

El documento está dirigido a los profesionales de atención especializada implicados en el procedimiento quirúrgico, como anestesistas y cirujanos, y en aquellos que participan en la prevención de la infección quirúrgica, como infectólogos, microbiólogos, preventivistas y farmaceúticos.

1. **Metodología**

Las dos sociedades, SEIMC y AEC, nombraron a dos coordinadores para este proyecto, un infectólogo (MDT) y un cirujano (JMB). Éstos a su vez seleccionaron al resto de miembros del panel de expertos, que incluye cirujanos, infectólogos, internistas, y microbiólogos pertenecientes a las dos sociedades. El manuscrito final estuvo a disposición de los miembros de ambas sociedades para su revisión y sugerencias.

Como se ha comentado, la guía es una actualización y revisión de la ya publicada en 2002, y basada en guías publicadas recientemente bien diseñadas, en la que se fueron contestando a las preguntas de interés clínico.

Con el fin de responder a cada pregunta, se realizó una búsqueda sistemática bibliográfica (Biblioteca Cochrane Plus (Cochrane Library), Medline, EMBASE, Scopus, Tryp database, DARE), desde 1970 hasta octubre de 2018, aunque se incluyen algunos trabajos que se publicaron con posterioridad, durante la revisión de la guía, y que se consideraron relevantes. Los estudios encontrados se resumieron en tablas siguiendo la metodología PICO (tabla 1), lo que permitió una graduación más objetiva de la evidencia científica. De acuerdo con la normativa de SEIMC se utilizaron los criterios establecidos por la SEIMC para la gradación de la evidencia (tabla 2) y la evaluación de la calidad metodológica de acuerdo con la Agree Colaboration (www.agreecollaboration.org). La redacción final del documento se realizó igualmente siguiendo la normativa SEIMC. El texto completo fue revisado y aprobado por todos los autores, y estuvo abierto en la página web de la SEIMC para su revisión por todos los socios. Ningún miembro del panel de expertos mostró conflicto de intereses para este documento.

Tabla 1. Componentes PICO de la pregunta de investigación.

| **Ref** | **Diseño** | **Paciente** | **Intervención** | **Comparación** | **Resultado (outcome)** | **Evidencia** |
| --- | --- | --- | --- | --- | --- | --- |
|  |  | Grupo de pacientes o población de interés | Qué intervención se realizó | Qué estrategia se quiere comparar con la intervención | Resultado medible de la intervención | I  II  III |

Tabla 2. Tabla de recomendaciones.

| **Strength of recommendation** |  |
| --- | --- |
| **A** | Strongly supports a recommendation for use |
| **B** | Moderately supports a recommendation for use |
| **C** | Marginally supports a recommendation for use |
| **D** | Supports a recommendation against use |
| **Quality of evidence** |  |
| **I** | Evidence from at least one randomized controlled trial supporting the recommendation being made |
| **II** | Evidence from at least one well-designed clinical trial without randomization, cohort study or case-controlled study |
| **III** | Evidence from expert opinion based on clinical experience or descriptive cases |

1. **Principios básicos de la profilaxis**

El principio general de la profilaxis antibiótica en cirugía es la consecución de concentraciones de antibiótico séricas y tisulares por encima de las concentraciones mínimas inhibitorias (CMI) de los microorganismos contaminantes más probables para cada procedimiento quirúrgico cuando se hace la incisión, y su mantenimiento durante toda la intervención quirúrgica5,9. El tiempo necesario para que un antibiótico alcance concentraciones efectivas en un tejido determinado depende de su perfil farmacocinético y de la vía de administración utilizada.

- 1. **¿Cuándo está indicada la profilaxis?**

*Términos de búsqueda: “Antibiotic Prophylaxis” AND “Indications” AND “Recommendations”.*

El sistema tradicional de evaluación del riesgo de ILQ se basa en los índices de infección de los diferentes tipos de cirugía según la clasificación de limpia, limpia-contaminada, contaminada o sucia (*National Research Council*)10. Así, la profilaxis antibiótica está indicada cuando las probabilidades de infección sean altas o cuando las consecuencias de una infección postoperatoria sean potencialmente graves para el paciente (endocarditis, endoftalmitis, infección protésica) (A-III). Las cirugías clasificadas como limpia-contaminada y contaminada son claramente tributarias de profilaxis antibiótica (A-II). En la cirugía sucia, en la que existe supuración o infección evidentes, los antibióticos se administran en forma de tratamiento. En la cirugía limpia, la indicación de la profilaxis antibiótica depende del tipo de intervención, de la comorbilidad del paciente y de la existencia de material protésico, aunque en algunos casos no ha sido aun totalmente esclarecida.

- 1. **¿Cuál es el antimicrobiano más adecuado?**

*Términos de búsqueda: “Antibiotic Prophylaxis” AND “Surgical Wound Infection/etiology”, “Antibiotic Prophylaxis” AND “Practice guidelines as topic”.*

En cirugía limpia, los microorganismos involucrados en las ILQ son los de la microbiota cutánea (*S. aureus* y estafilococoscoagulasa negativos) y en la cirugía limpia-contaminada, que incluye la cirugía abdominal y el trasplante de corazón-pulmón, riñón e hígado, además de los microorganismos aludidos están implicados los bacilos gramnegativos y los enterococos, y tienen representación variable los anaerobios11. En la tabla 3 se muestran los microorganismos involucrados en las ILQ por tipo de cirugía en trece países europeos, según datos del ECDC-Surveillance Report-201412 .

Tabla 3. Microorganismos detectados por tipo de ILQ en 13 países europeos (2012)12.

|  | **Bypass**  **coronario** | **Colecistectomía** | **Cirugía colon** | **Cesárea** | **Prótesis cadera** | **Prótesis rodilla** | **Laminectomía** |
| --- | --- | --- | --- | --- | --- | --- | --- |
| **CGP** | 60,3 | 38 | 31,3 | 56 | 66 | 73,8 | 68 |
| **Enterobacterias** | 23 | 45,3 | 46,6 | 30,6 | 17,4 | 15,2 | 16 |
| **BGNNF** | 7,4 | 4 | 8,4 | 3,6 | 7 | 4,2 | 12 |
| **Anaerobios** | 0,5 | 4,4 | 6,1 | 3,9 | 1,1 | 1,5 | 0 |
| **Hongos** | 1,6 | 2,6 | 3 | 0 | 0,8 | 0,2 | 0 |

Como puede observarse, la contribución relativa de los distintos grupos de microorganismos varía según el tipo de intervención quirúrgica.

Para la mayor parte de los procedimientos quirúrgicos, las cefalosporinas y en concreto la cefazolina, son los fármacos de elección para la profilaxis ya que presentan una eficacia probada, espectro de actividad adecuado frente a los microorganismos que se encuentran con más frecuencia en las infecciones quirúrgicas, escasos efectos adversos, y bajo coste. Los ensayos clínicos y metaanálisis que prueban su eficacia no son recientes13,14 pero son recogidos por la mayor parte de las guías de profilaxis antibiótica en cirugía15,16**.**

No se han encontrado evidencias suficientemente sólidas que muestren tasas de infección del sitio quirúrgico inferiores al utilizar antimicrobianos de amplio espectro respecto a antimicrobianos de espectro reducido como cefazolina17.

Tres metaanálisis han comparado la eficacia entre betalactámicos y glucopéptidos (vancomicina o teicoplanina) en profilaxis antibiótica en cirugía. Bolon et al.18 no encontraron diferencias en la eficacia entre estos dos grupos de antibióticos en la reducción del riesgo de la ILQ en cirugía cardíaca, aunque los betalactámicos redujeron el riesgo de infección profunda de la herida esternal, y los glucopéptidos fueron más efectivos en el subgrupo de pacientes con ILQ por estafilococos resistentes a meticilina. Chambers et al19, tampoco encontraron diferencias en la eficacia entre estos dos grupos de antibióticos en la reducción del riesgo de la ILQ en varios tipos de cirugía (cardíaca, vascular y traumatológica) y comprobaron la falta de consenso sobre el umbral de prevalencia hospitalario de *S. aureus* resistente a meticilina a partir del cual sería recomendable la utilización de glucopéptidos en vez de betalactámicos. Por su parte, Voigt et al20 analizan el subgrupo de dos ensayos clínicos de profilaxis en artroplastias primarias sin encontrar diferencias de eficacia entre estos dos grupos de antibióticos.

En cirugía colorectal un metaanálisis21 que recogió 260 ensayos clínicos, con 68 antibióticos diferentes, 24 de ellos cefalosporinas y 43.451 pacientes, comprobó que la cobertura de enterobacterias y anaerobios con un antibiótico o combinación de antibióticos activos frente a ambos grupos de microorganismos fue mucho más efectiva para reducir la ILQ que la cobertura solo de enterobacterias o solo de anaerobios.

***Recomendaciones***

*Los antibióticos seleccionados deben ser activos frente a los microorganismos aislados con más frecuencia en cada tipo de procedimiento quirúrgico, aunque la mayor parte de expertos aconsejan la utilización de una cefalosporina de primera o segunda generación (A-III).*

- *La elección de los antibióticos para profilaxis debe tener en cuenta la epidemiología local y los patrones de resistencia a los antimicrobianos de los microorganismos que causan las infecciones quirúrgicas en el hospital (A-III).*
- *Las cefalosporinas de 1ª y 2ª generación, pero fundamentalmente cefazolina, son los antibióticos de elección para la profilaxis en la mayoría de las cirugías (A-I).*
- *En caso de alergia a betalactámicos, antecedentes de colonización o infección por Staphylococcus aureus resistente a meticilina, o prevalencia elevada en el hospital de infección de la herida quirúrgica por este microorganismo, puede emplearse un glucopéptido (A-I).*
- *En cirugía de colon o ginecológica, donde la implicación de los microorganismos anaerobios y enterobacterias en la colonización del sitio quirúrgico es esperable, se aconseja elegir un antibiótico o combinación de antibióticos con actividad frente a ambos grupos de microorganismos (A-I).*
  1. **¿Cuál es el momento óptimo para administrar la profilaxis?**

*Términos de búsqueda: “Antibiotic Prophylaxis” AND “Practice guidelines as topic”. “Antibiotic Prophylaxis” AND “Administration and dosage”.*

Una revisión sistemática y metaanálisis22, que incluyó 54.552 pacientes de 13 estudios observacionales de cohorte23–35 y un estudio caso control36, muestran que el riesgo de ILQ se duplica si la profilaxis antibiótica se administra después de la incisión (OR 1,89, IC95% 1,05-3,4) y se multiplica por 5 si se administra demasiado pronto, más allá de 120 minutos antes a la incisión, (OR 5,26, IC95% 3,29-8,39), con respecto a la administración dentro de la ventana de 120 minutos antes de la incisión. Un ensayo clínico29 no ha encontrado diferencias en las tasas de ILQ entre dos grupos de pacientes, uno a los que se administró antibióticos de forma temprana (entre 30 y 75 minutos antes de la incisión) y otro a los que se administró de forma tardía (entre 0-30 minutos antes de la incisión). Las tasas de ILQ fueron 4,9% y 5,3%, respectivamente, (OR 0,93 IC95% 0,72-1,21). El ensayo clínico incluyó 5.175 pacientes de cirugía colorrectal, vascular y traumatológica a los que se administró 1,5 g de cefuroxima en dosis única (más 500 mg de metronidazol en cirugía abdominal). Por lo tanto y de acuerdo con la evidencia disponible, no es posible precisar el tiempo exacto de la administración dentro de la ventana de 120 minutos antes de la incisión.

En el caso de cirugías que requieran la isquemia de un miembro mediante el hinchado de torniquete, como en la cirugía ortopédica, no existe mucha evidencia del mejor momento para administrar la profilaxis. Un ensayo clínico realizado con pacientes de cirugía electiva para reducción abierta de fracturas mediante fijación interna (n=106) compararon la administración de cefuroxima 5 minutos antes de inflar el torniquete vs 1 minuto después37. La tasa de ILQ fue significativamente menor en el grupo de profilaxis antes de la isquemia (3,9% vs 14,8%). Previamente en un ensayo clínico aleatorizado de 908 pacientes sometidos a artroplastia de rodilla se comparó la administración de 1,5 g de cefuroxima 10-30 minutos antes de la isquemia (grupo estándar) vs 1,5 g de cefuroxima antes de la liberación del manguito (grupo intervención)38. La tasa de infección profunda de la herida al año fue de 3,6% en el grupo estándar y 2,6% en el grupo intervención, sin diferencias significativas. Llama la atención que en el primer grupo el 12,5% de las infecciones fueran cultivo negativo, y ninguna en el grupo intervención, y también fueron más frecuentes las infecciones polimicrobianas, por bacilos gramnegativos y enterococos. La explicación puede deberse en parte al descenso de los niveles de antibióticos que se produce tras la isquemia39. En espera de estudios más robustos, se sigue recomendando la administración del antibiótico antes del hinchado del manguito.

***Recomendaciones***

*La profilaxis antibiótica en cirugía debe ser administrada durante los 120 minutos previos a la incisión quirúrgica (A-I).*

- *En el caso de los betalactámicos de semivida corta (p.ej.: penicilinas y cefalosporinas como cefazolina, cefoxitina y cefuroxima) es aconsejable su administración durante los 60 minutos previos a la incisión quirúrgica (B-II).*
- *En el caso de vancomicina, aminoglucósidos o fluoroquinolonas, la infusión intravenosa debe comenzar 90 minutos antes de la incisión quirúrgica, ya que estos antibióticos requieren periodos de infusión largos (B-II).*
- *En el caso de cirugías que requieran la isquemia del miembro, administrar la profilaxis antes de hinchar el torniquete (A-III).*
  1. **¿Cuál es la dosis adecuada?**

*Términos de búsqueda: “Antibiotic Prophylaxis” AND “Practice guidelines as topic”. “Antibiotic Prophylaxis” AND “Administration and dosage”.*

La mayoría de los expertos considera que la dosis utilizada en profilaxis debe aproximarse al límite superior de la dosis terapéutica (p.ej., 2 g de cefazolina).

Hay indicios de evidencia que señalan que la dosis inicial de vancomicina de 1 g (15 mg/kg basado en el peso corporal total) cuando se utiliza en profilaxis quirúrgica en cirugía cardiotorácica puede ser insuficiente, y se recomienda una dosis inicial de 20 mg/kg según el peso corporal total40.

En las tablas 4 y 5 se recogen la dosis inicial de los antimicrobianos en la profilaxis quirúrgica tanto en adultos como en niños, oral e intravenosa.

***Recomendaciones***

- *Se acepta de forma general que la dosis de un antibiótico para profilaxis es la misma que la utilizada para el tratamiento de la infección (A-III).*
  1. **¿Hay que modificar la dosis en el paciente obeso?**

*Términos de búsqueda: “Antibiotic Prophylaxis” AND “Obesity” OR “Morbid obesity” OR “Overweight” OR “Body Weight”. “Antibiotic Prophylaxis” AND “Pharmacokinetics” OR “Pharmacodynamics” combinado con los términos de grupos de antibióticos (“Betalactams” OR “Cephalosporins” OR “Aminoglycosides” OR “Fluoroquinolones” OR “Glycopeptides”) o antibióticos individuales (p.ej.: “cefazolin”).*

El mayor reto en profilaxis antibiótica en cirugía es la selección de la dosis inicial teniendo en cuenta el peso y, además, en antimicrobianos como los aminoglucósidos, la función renal. Con respecto al peso corporal, en pacientes obesos existe riesgo de infradosificar los fármacos de naturaleza lipófila (p.ej. metronidazol) si se dosifican en función del peso ideal; sin embargo, en el caso de fármacos de naturaleza hidrofílica (p.ej. aminoglucósidos), existe el riesgo de sobredosificar si se utiliza el peso total del paciente. Pai41 ha propuesto el cálculo de la dosis inicial del obeso basada en la fórmula:

**Dosis paciente obeso = dosis estándar para peso medio x (peso paciente obeso/peso medio) β**

dónde β toma un valor de 0,5-0,75.

Esta aproximación conduce a que una dosis de 750 mg en un paciente de peso medio (75 kg) se incremente hasta una dosis inicial de 1060-1260 mg en un paciente de 150 kg. La dosis se incrementa entre un 40-70% para pacientes entre 120-180 kg y en obesos mórbidos (entre 180-270 kg), la dosis inicial puede ser el doble de la dosis de un paciente de peso medio. Este es el fundamento de la dosis inicial de 2 g de cefazolina en profilaxis quirúrgica en pacientes con <120 kg de peso y de 3 g en pacientes con >120 kg de peso.

La variabilidad observada en las concentraciones de los antibióticos en suero y tejidos en los pacientes obesos se deben a cambios fisiológicos que incrementan el volumen de distribución (Vd) y el aclaramiento (CL) de los fármacos, aunque no necesariamente en proporción al peso corporal total42.

En obesos, el Vd y el CL de vancomicina están aumentados y diferentes estudios han demostrado la existencia de correlación entre estos parámetros y el peso corporal total43. Dada la variabilidad de la concentración sérica observada en pacientes obesos, hay que considerar una dosis inicial de vancomicina como mínimo de 20 mg/kg en pacientes con función renal normal, establecida según el peso total, en un tiempo de infusión de 1,5-2h. Esta dosis inicial persigue obtener valles >10 mg/L lo antes posible, lo que permite obtener una exposición eficaz frente a los aislados bacterianos con valores de CMI ≤1 mg/L. Para este supuesto se alcanza el índice farmacocinético/farmacodinámico requerido de fármaco libre (50% de unión a proteínas) de *f* Cmin/CMI >4 44.

Para el cálculo de la dosis inicial se debe calcular el Vd según las fórmulas:

Vd = 0,5 L/kg x peso total (kg). Para pacientes con índice de masa corporal ≥ 40 kg/m2

Vd = 0,7 L/kg x peso total (kg). Para pacientes con índice de masa corporal entre 30-39 kg/m2

Una vez calculado el Vd, se debe calcular la dosis inicial o de carga mediante la fórmula:

Dosis inicial = Vd x pico deseado. El pico deseado suele fijarse entre 30-40 mg/L.

En cualquier caso, para evitar la sobredosificación en los pacientes obesos, según la mayoría de expertos, las dosis de carga (p.ej: para un paciente obeso de 150 kg, la dosis inicial para un pico de 30 mg/L sería de 2250 mg) y las de mantenimiento, no deberían sobrepasar de 3 g y 2 g, respectivamente 20.

Hay pocos datos sobre las recomendaciones de profilaxis antibiótica con teicoplanina en obesos. Por lo general en pacientes con <85 kg. la dosis recomendada es la estándar de 800 mg. Para pacientes con >85 kg se recomienda dosificar por peso corporal (10-12 mg/kg)45,46.

En el caso de aminoglucósidos, con incrementos variables en el Vd y en el Cl respecto a pacientes no obesos, una estrategia comúnmente aceptada es el cálculo de la dosis utilizando el peso ajustado (el peso ideal más el 40% de la diferencia entre el peso total y el ideal).

Cálculo del peso ideal (PI):

PI en hombres en kg = 50 + [0,9 x (altura en cm – 152)]

PI en mujeres en kg = 45 + [0,9 x (altura en cm – 152)]

Cálculo del peso ajustado (PA) o peso magro:

PA en kg = PI + 0,4 x (peso total – PI)

Dado que la exposición al fármaco, cuantificada por el área bajo la curva concentración-tiempo (AUC) se relaciona con la dosis administrada y con el aclaramiento sistémico, se ha preconizado que la dosis inicial de aminoglucósidos se base en la estimación de la función renal y en el valor predefinido de eficacia (AUC en un periodo de 24 horas, AUC 0-24: 75, 150 y 300 mg·h/L para gentamicina, tobramicina y amikacina, respectivamente)47. Como ejemplo, para un paciente obeso de 130 kg con un CLcr de 75 mL/min (4,5 L/h) se espera que tenga un CL de la gentamicina de 4,05 L/h (90% del CLcr). Para conseguir alcanzar el valor predefinido de de 75 mg·h/L se debería administrar una dosis única de 304 mg (75 mg·h/L x 4,05 L/h).

Un estudio demuestra que el CL de levofloxaxino en obesos mórbidos (índice masa corporal ≥40 kg/m2), se correlaciona mejor con el CLcr estimado con la ecuación de Cockcroft-Gault y el peso corporal ideal. Teniendo esto en cuenta, se propone que para el cálculo de la dosis inicial se tenga en cuenta el CLcr basado en el peso corporal ideal48.

Filtrado glomerular (mL/min) = [(140 – edad en años) x peso ideal en kg] / (creatinina sérica en mg/dL x 72).

El cálculo de las dosis de mantenimiento en los obesos en una profilaxis prolongada (p.ej.: cirugía de larga duración) no está bien resuelto, dada la frecuente ausencia de monitorización de niveles de fármacos en estos casos. Para algunos antibióticos, como los glucopéptidos y aminoglucósidos, la dosificación basada en la función renal estimada, puede ser una alternativa razonable y clínicamente útil49,50 .

***Recomendaciones***

*En los pacientes obesos, las concentraciones de algunos antibióticos pueden modificarse debido a alteraciones farmacocinéticas. Parámetros farmacocinéticos como el volumen de distribución (Vd) y el aclaramiento del fármaco (CL) pueden ser mayores en los pacientes obesos, pero a menudo no son proporcionales al peso corporal total (A-II).*

- *Los pacientes obesos pueden requerir dosis iniciales más elevadas. Las dosis convencionales para pacientes no obesos pueden conducir a la infradosificación, mientras que las dosificaciones basadas en el peso corporal total tienden a la sobredosificación en los obesos (A-II).*
- *La utilización de descriptores subrogados del peso corporal total, como el peso ideal o el peso ajustado pueden corregir las sobredosificaciones en obesos basadas en el peso total (A-II).*
- *El cálculo de las dosis de mantenimiento en una profilaxis prolongada (p.ej.: cirugía de larga duración) en los obesos no está bien resuelto, aunque la aproximación a la selección de dosis basadas en la estimación de la función renal puede ser una alternativa razonable y clínicamente útil (A-II).*
  1. **¿Es necesario repetir la dosis durante la cirugía?**

*Términos de búsqueda: “Antibiotic Prophylaxis” AND “Administration and dosage”.*

Zanetti et al51, en un estudio retrospectivo, comprobaron que una o dos dosis de cefazolina (semivida de 1,8 horas) eran igual de efectivas en los procedimientos de cirugía cardíaca de duración <240 minutos, pero que la dosis adicional en aquellos procedimientos de mayor duración con tiempos quirúrgicos superiores a 400 minutos disminuyó la tasa de infección un 8% (del 16% sin redosificación al 7,7% con dosis adicional, OR 0,44 IC95% 0,23-0,86).

Pocos estudios han determinado la variación de las concentraciones de antibióticos durante la intervención quirúrgica y la necesidad de dosis adicionales intraoperatorias. Dos trabajos farmacocinéticos en cirugía colorrectal52,53 revelaron que en caso de cirugías largas (más de 2 horas de intervención), las características del paciente condicionan la necesidad de dosis adicionales. En pacientes con función renal moderada y normal, se requieren dosis adicionales de cefuroxima cada 4 h y 2 h, respectivamente, hasta el final de la cirugía. Con respecto al metronidazol, es necesario administrar una dosis adicional a las 4 horas de cirugía en pacientes con pesos corporales cercanos a 90 kg. Para sujetos con pesos inferiores no se requieren más dosis. Varios estudios farmacocinéticos sobre cefazolina en cirugía cardíaca que requiere bypass cardiopulmonar54,55 en niños y adultos con función renal preservada, han mostrado que el régimen de profilaxis estándar de 2 g en la inducción anestésica con nueva dosis a las 4 horas es insuficiente para mantener concentraciones ≥40 mg/L (≥8 mg/L de fármaco libre, es decir, 4 x CMI frente a la mayor parte de la microbiota sensible de la piel que presenta CMIs ≤2 mg/L) durante toda la duración de la cirugía. Los autores proponen regímenes alternativos (en niños bolus adicional al inicio del bypass cardiopulmonar y en adultos 2 g cada 3 horas durante la cirugía) para los pacientes con función renal preservada y cirugía de larga duración.

Por otra parte, un estudio realizado en adultos (con cefazolina)56 y otro en niños (con cloxacilina)57 mostró que las pérdidas significativas de sangre (>1.500 mL) en procedimientos quirúrgicos mayores, se asociaron con concentraciones de antibiótico por debajo de los niveles terapéuticos.

En la tabla 4se recogen las dosis y el momento de administración de la segunda dosis, si procede, basado en la semivida de los antibióticos y en estudios farmacocinéticos. Como puede comprobarse en esta tabla, se ha acortado el tiempo de administración de la segunda dosis para las cefalosporinas en los pacientes con función renal preservada, que son los que tienen mayor riesgo de infraexposición a estos antibióticos.

Tabla 4. Recomendaciones de la dosis inicial y si procede de la segunda dosis, de los antimicrobianos más utilizados en profilaxis quirúrgica por vía intravenos 45,46,52–55,58,59 .

| **Antimicrobiano** | **Dosis recomendada** | |  | **Semivida plasmática en adultos con función renal normal (h)** | **Tiempo de administración (h) de la segunda dosis (respecto a la dosis inicial) con función renal normal** |
| --- | --- | --- | --- | --- | --- |
| **Adultos** | **Niños** | **Tiempo de infusión (min)** |
| **Cefazolina** | 2 g, 3 g para pacientes con peso ≥120 Kg | 30 mg/Kg | 30 | 1,8 | 3 |
| **Cefuroxima** | 1,5 g | 50 mg/Kg | 30 | 1,4 | 2 |
| **Cefoxitina** | 2 g | 40 mg/Kg | 30 | 1 | 1 |
| **Amoxicilina-clavulánico** | 2.000/200 mg | 50/12,4 mg/kg | 30 | 1 | 3 |
| **Azitromicina** | 500 mg |  | 60  Diluido en 250 mL de suero fisiológico (concentración de 2 mg/mL) | 11-14 (tras 1ª dosis) | 24 |
| **Clindamicina** | 900 mg | 10 mg/Kg | 30 | 2,5 | 6 |
| **Gentamicina** | 5 mg/Kg (peso de dosificación, PD)  PD = PI + 0,4 x (PT-PI)  PI: peso ideal, PT:peso total | 2,5 mg/Kg (peso de dosificación) | 30-60 | 2 | - |
| **Metronidazol** | 500 mg-1500 | 15 mg/Kg | 30-60 | 7-8 | 4 (si peso > 90 kg) |
| **Vancomicina** | 20 mg/Kg | 20 mg/Kg | 60 (≤ 1 g)  90 (> 1 g) | 6-8 | - |
| **Teicoplanina** | 800 mg (10-12 mg/kg con peso > 85 kg) | 10 mg/kg | 30 | 50-70 |  |
|  | **Antibióticos orales en cirugía colorrectal (utilizados conjuntamente con una preparación mecánica de colon)** | | | | |
| **Eritromicina base** | 1 g | 20 mg/Kg |  | 0,8-3 | - |
| **Metronidazol** | 500 mg 3 dosis o 750 mg 2 dosis | 15 mg/Kg |  | 6-10 | - |
| **Neomicina** | 1 g | 15 mg/Kg |  | 2-3 (3% absorbido en condiciones gastrointestinales normales) | - |

Tabla 5. Recomendaciones de la dosis inicial de los antimicrobianos más utilizados por vía oral en profilaxis quirúrgica9,45,46,52–55,59

| **Antimicrobiano** | **Dosis recomendada** | | **Semivida plasmática en adultos con función renal normal (h)** |
| --- | --- | --- | --- |
| **Adultos** | **Niños** |
| **Amoxicilina** | 1.000-2.000 mg | 13,3 mg/Kg | 1 |
| **Amoxicilina/ácido clavulánico** | 875-2000/125 mg |  | 1 |
| **Azitromicina** | 500-1.000 mg | 10 mg/Kg | 11-14 (tras 1ª dosis) |
| **Cefuroxima** | 750-1000 mg |  | 1-2 |
| **Doxiciclina** | 100 mg | 1,1-2,2 mg/Kg (> 8 años) | 14 |
| **Fosfomicina trometamol** | 3.000 mg |  | 6 |

***Recomendaciones***

- *Se recomienda una dosis adicional intraoperatoria cuando el procedimiento quirúrgico exceda dos veces la semivida del antibiótico (B-II).*
- *Con cefazolina u otro antibiótico con semivida similar se debe administrar una segunda dosis intraoperatoria a las 3 horas (B-II).*
- *Se recomienda una dosis adicional cuando la semivida del antibiótico está disminuida (quemados, elevadas tasas de filtración glomerular), o sangrado significativo (> 1.500 mL en adultos ó 25 mL/kg en niños) (B-II).*
  1. **¿Cuál es la duración más adecuada?**

*Términos de búsqueda: “Antibiotic Prophylaxis” AND “Administration and dosage”.*

Varios estudios17,60,61 mostraron que la prolongación de la profilaxis no aportó ventajas adicionales frente a la unidosis o profilaxis de corta duración.

Según el Registro Noruego de Artroplastias62, con seguimientos de hasta 14 años, la profilaxis durante 24 horas en artroplastia de cadera se asoció con menores tasas de reintervención que la profilaxis en monodosis.

Un metaanálisis63 y guías de profilaxis quirúrgica publicadas poco antes de este manuscrito5 apoyan que puede ser suficiente la administración de una única dosis preoperatoria en la artroplastia primaria.

***Recomendaciones***

- *Para la mayoría de los procedimientos quirúrgicos, una dosis única de un antibiótico cuya semivida asegure niveles de fármaco en suero y tejido suficientes mientras dura la intervención quirúrgica es adecuada (A-I).*

1. **¿Cuáles son los efectos adversos de la profilaxis antibiótica en cirugía?**

*Términos de búsqueda: “Antibiotic Prophylaxis” AND “Adverse effects”*

La administración de los antibióticos en la profilaxis quirúrgica en el mínimo tiempo posible y manteniendo la eficacia, permite disminuir los efectos adversos de los fármacos, como son la alergia medicamentosa (sobre todo a betalactámicos), la diarrea asociada a los antibióticos y/o infección por *Clostridioides difficile*, el desarrollo de resistencia a los antimicrobianos y el fracaso renal agudo secundario a los procedimientos de cirugía mayor y/o administración concomitante de determinados fármacos como los aminoglucósidos y glucopéptidos.

- 1. **¿Qué debemos hacer ante un paciente que refiera alergia a los beta-lactámicos?**

*Términos de búsqueda: “Antibiotic Prophylaxis/adverse effects” AND “Drug hypersensitivity” AND “Betalactams” OR “beta-lactams”.*

Entre el 90-99% de los pacientes que refieren alergia a penicilina o que entre sus antecedentes personales figuran episodios alérgicos imprecisos, no lo son (no presentan hipersensibilidad inmediata) y <3% de los pacientes con alergia a penicilina presentan reactividad cruzada con cefazolina64. Además, en un estudio de cohorte retrospectivo se comprobó que los pacientes etiquetados de alergia a betalactámicos presentaron un riesgo mucho mayor de ILQ, que pudo ser atribuido a la administración de antibióticos alternativos de segunda línea con menor eficacia12.

Los pacientes con historia de reacción alérgica grave tanto inmediata (anafilaxia, edema laríngeo, broncoespasmo, hipotensión, urticaria y/o angioedema), de inicio en la primera hora tras la administración de un betalactámico, como no inmediata (síndrome de Stevens-Johnson; necrolisis epidérmica tóxica, síndrome de hipersensibilidad y reacciones organoespecíficas) no deben recibir profilaxis con betalactámicos, cuando haya otras alternativas terapéuticas eficaces. A día de hoy, no hay evidencia de cómo reducir el riesgo de shock anafiláctico en pacientes que van a recibir profilaxis antibiótica50.

No se recomienda el empleo de una cefalosporina si existen antecedentes de anafilaxia a penicilina y no se dispone de pruebas cutáneas que permitan predecir la existencia de alergia a las cefalosporinas43.

En caso de que el paciente haya sufrido una reacción no inmediata leve (exantema maculopapuloso con aminopenicilinas, por ejemplo), dado que la reactividad cruzada entre penicilinas y cefalosporinas se aproxima al 10%, la actitud puede ser más intervencionista y se podrían administrar otros betalactámicos (p.ej.: cefalosporinas), siempre y cuando tengan la cadena lateral diferente al betalactámico implicado en la reacción alérgica65.

Como norma general, se podrían emplear otros betalactámicos, siempre y cuando el estudio alergológico lo haya corroborado mediante pruebas de exposición13.

***Recomendaciones***

- *La clarificación de la alergia a betalactámicos debe formar parte de la rutina de la consulta de anestesia y de los cuidados del preoperatorio (B-II).*
- *Los pacientes con historia de reacción alérgica grave tanto inmediata, de inicio en la primera hora tras la administración de un betalactámico, como no inmediata, no deben recibir profilaxis con betalactámicos, cuando haya otras alternativas terapéuticas eficaces (B-III).*
- *Se podrían emplear otros betalactámicos (con cadena lateral diferente al betalactámico implicado en la reacción alérgica) siempre y cuando el estudio alergológico lo haya corroborado mediante pruebas de exposición (B-II).*
- *Las guías locales de profilaxis antibiótica deben contemplar fármacos alternativos a los betalactámicos, de probada eficacia, para estos pacientes alérgicos (B-III).*
  1. **Diarrea asociada a los antibióticos e infección por *Clostridioides difficile*.**

*Términos de búsqueda: “Antibiotic Prophylaxis/adverse effects” AND “Clostridium difficile” OR “Clostridioides difficile”.*

No hay evidencia de cómo reducir la incidencia de diarrea asociada a los antibióticos en los pacientes que reciben profilaxis antibiótica en cirugía.

En un estudio epidemiológico sobre infección por *C. difficile*, la profilaxis antibiótica quirúrgica fue el único factor de riesgo detectado para desarrollarla. De 7.600 pacientes con exposición a antibióticos profilácticos, únicamente el 1,5% desarrollaron infección por *C. difficile*66.

Hay evidencia de que las dosis múltiples de cefalosporinas tienen mayor riesgo de producir infección por *C. difficile* que la dosis única. En un estudio con 1.800 pacientes intervenidos de fractura de cadera, el cambio de una política de profilaxis antibiótica de tres dosis de cefuroxima (1,5 g) a una dosis de cefuroxima (1,5 g) con gentamicina (240 mg) disminuyó de forma significativa la infección por este microorganismo (de un 4,2% a 1,6%)67. También se ha comprobado mayor riesgo de infección por *C. difficile* en pacientes que una vez suspendida la profilaxis antibiótica en cirugía de artroplastia primaria, han tenido que ser tratados con antibióticos diferentes por otras infecciones concomitantes durante el ingreso68.

En una cohorte multicéntrica retrospectiva de 79.058 pacientes intervenidos de cirugía cardiaca, ortopédica, colorrectal y vascular, después de controlar mediante regresión logística por múltiples variables de confusión, el riesgo infección postquirúrgica por *C. difficile* estuvo asociado a la duración de la profilaxis (24-<48 horas: OR 1,08 [IC95% 0,89-1,31]; 48-<72 horas: OR 2,43 [IC95% 1,80-3,27;>72 horas: OR 3,65 [IC95% 2,40-5,53)69, sin encontrar una menor incidencia de infecciones quirúrgicas cuando se utilizaba una profilaxis más prolongada. En el análisis no ajustado, el número necesario a tratar (NNT) para tener una infección por *C. difficile* fue 2000, 50, y 20 respectivamente.

***Recomendaciones***

- *Existe un mayor riesgo de infección por C. difficile con algunos antibióticos utilizados en profilaxis antibiótica, como las cefalosporinas, carbapenemas, fluoroquinolonas o clindamicina (A-II).*
- *El riesgo de infección por C. difficile es mayor si se prolonga la duración de la profilaxis antibiótica (A-II).*
  1. **Incremento de la resistencia a los antibióticos.**

*Términos de búsqueda: “Antibiotic Prophylaxis/adverse effects” AND “antimicrobial resistance”.*

Hay evidencia de que la profilaxis de corta duración en cirugía de cabeza y cuello, induce una menor tasa de infección postoperatoria por *S. aureus* resistente a meticilina que la profilaxis de larga duración70.

En un estudio observacional de cohorte con seguimiento de 4 años, una duración de la profilaxis superior a 48 horas en cirugía cardiovascular incrementó el riesgo de resistencia adquirida a los antimicrobianos (OR ajustada 1,6; IC95% 1,1-2,6)71.

***Recomendaciones***

- *La utilización de unidosis en profilaxis quirúrgica, con las excepciones especiales (como cirugía prolongada y pérdida de sangre significativa, entre otras), contribuye a minimizar la resistencia adquirida a los antimicrobianos (A-II).*
  1. **Incremento de fracaso renal agudo**

*Términos de búsqueda: “Antibiotic Prophylaxis/adverse effects” AND “Acute Kidney Injury”.*

La incidencia de fracaso renal agudo (FRA)en pacientes ingresados en hospitales de agudos es del 5%-7%, y entre el 30%-40% ocurren en el periodo perioperatorio. Incrementa la morbimortalidad en el postoperatorio y se estima que hasta un 30% son iatrogénicos y/o potencialmente prevenibles72 .

Mediante regresión logística y en cirugía traumatológica, Bell *et al*.73 encontraron siete predictores independientes de FRA: hombres, mayor edad, diabetes, mayor número de fármacos prescritos que predisponen al deterioro renal, menor aclaramiento estimado de creatinina, uso de inhibidores de la enzima convertidora de angiotensina II (IECA) o bloqueantes de los receptores de la angiotensina II (BRA) y mayor riesgo ASA. Este grupo detectó hasta un 11% de FRA en pacientes que habían sido sometidos a cirugía traumatológica, y la supervivencia fue menor a largo plazo incluso en los pacientes que habían tenido una disfunción renal leve (estadio 1) respecto a los pacientes sin disfunción renal.

A este respecto, tanto las guías como la mayor parte de expertos recomiendan una determinación secuencial de creatinina sérica y urinaria en el preoperatorio (comprobación del grado de función renal) y en el postoperatorio74. Si además estos pacientes han recibido profilaxis con aminoglucósidos o glucopéptidos, el riesgo de desarrollar FRA aumenta, lo que pudo comprobarse en el Reino Unido cuando se cambió el protocolo de profilaxis quirúrgica en cirugía traumatológica de cefuroxima a flucloxacilina más gentamicina para aminorar el número de infecciones por *C. difficile*. El porcentaje de FRA pasó del 6,2% al 10,8% en Escocia75 y del 1% al 8% en Inglaterra76. De igual forma, en el intento de controlar las infecciones por *S. aureus* resistente a meticilina en artroplastias primarias de cadera y rodilla, y después de añadir vancomicina a cefazolina, Maxwell Courtney *et al*77 detectaron un incremento significativo de FRA (13% frente al 8% en el grupo de cefazolina), que además fueron de mayor gravedad (FRA de estadios II y III). En este estudio, la profilaxis dual (vancomicina y cefazolina), el mayor riesgo ASA y la enfermedad renal previa a la intervención fueron factores de riesgo independientes de FRA.

En la cohorte multicéntrica comentada en el apartado 4.2, la duración de la profilaxis antibiótica se asoció a un mayor riesgo de fracaso renal agudo, tanto para los procedimientos de cirugía cardiaca (duración de 24-<48 horas: OR 1,03 [CI95% 0,95-1,12]; 48-<72 horas: OR 1,22 [IC95% 1,08-1,39]; >72 horas: OR 1,82 [IC95% 1,54-2,16] como no cardiaca (duración 24-<48 horas: OR 1,31 [IC95% 1,21-1,42]; 48-<72 horas: OR 1,72 [IC95% 1,47-2,01]; >72 horas: OR 1,79 [IC95% 1,27-2,53] ), con un NNT en el análisis no ajustado de 9, 4 y 2, respectivamente69.

***Recomendaciones***

*Los procedimientos de cirugía mayor y traumatológica pueden exponer a los pacientes en el periodo perioperatorio a fracaso renal agudo (FRA) inespecífico, aún sin enfermedad renal previa. Además, estos pacientes pueden recibir profilaxis con antimicrobianos como los aminoglucósidos o glucopéptidos, que se asocian a nefrotoxicidad (A-II).*

- *Se deben solicitar mediciones secuenciales de creatinina sérica y urinaria, tanto en el preoperatorio como ≥ 24h después de la cirugía, a los pacientes de cirugía mayor para comprobar el grado de función renal, con especial atención a los pacientes que hayan recibido profilaxis con aminoglucósidos o glucopéptidos (A-II).*
  1. **¿Hay que cambiar la profilaxis en los pacientes colonizados por microorganismos multirresistentes?**

*Términos de búsqueda: “Antibiotic Prophylaxis” AND “methicillin-resistant Staphylococcus aureus”; “Antibiotic Prophylaxis” AND “Extended-spectrum Beta-lactamase–producing Enterobacteriaceae”; “Antibiotic Prophylaxis” AND “multidrug-resistant microorganism”*

No existe evidencia que demuestre que los portadores de microorganismos multirresistentes tengan más riesgo de ILQ que los portadores de cepas sensibles.

El estado de portador de *Staphylococcus aureus* resistente a la meticilina (SARM) se ha asociado a mayor riesgo de ILQ, sobre todo en cirugía ortopédica78–84. Existe menos evidencia en pacientes colonizados por bacterias gramnegativas multirresistentes. Un estudio prospectivo realizado en una cohorte de pacientes intervenidos de cirugía de colon mostró una mayor incidencia de ILQ y de ILQ por enterobacterias productoras de BLEE en los pacientes colonizados antes de la cirugía que en los no colonizados85 y otro estudio retrospectivo realizado en niños intervenidos de cirugía cardíaca86 encontró mayor riesgo de infección de la herida de esternotomía en los niños colonizados. Sin embargo, en un trabajo realizado en Tanzania, donde existe una alta prevalencia de colonización por enterobacterias productoras de BLEE, los pacientes colonizados no tuvieron más riesgo de infección87.

En los pacientes colonizados por SARM, la profilaxis con glucopéptidos no ha demostrado reducir la tasa global de infección de la ILQ, aunque sí las infecciones producidas por estafilococos resistentes88–90, e incluso en algunos trabajos se ha observado un aumento de las tasas globales de ILQ91. La profilaxis realizada con glucopéptidos más betalactámicos ha demostrado reducir las tasas de ILQ sobre todo cuando se combina junto al resto de medidas llevadas a cabo para la descolonización o descontaminación tópica del paciente90,92, principalmente en cirugía ortopédica y cardíaca.

En los pacientes colonizados por bacilos gramnegativos multirresistentes no existen evidencias que apoyen el cambio de profilaxis. En un estudio retrospectivo realizado en un hospital con una alta prevalencia de enterobacterias productoras de BLEE se comparó la profilaxis estándar con la profilaxis con una carbapenema en 266 pacientes sometidos a cirugía cardíaca, sin encontrarse diferencias en las tasas de ILQ93. En un estudio propectivo, no aleatorizado, publicado en 2019, la profilaxis con ertapenem en pacientes colonizados por enterobacterias productoras de BLEE sometidos a cirugía colorectal redujo la incidencia global de ILQ pero no la incidencia de infección profunda/órgano espacio94.

***Recomendaciones***

- *En cirugía de alto riesgo (cardíaca, ortopédica) en pacientes colonizados por SARM, la profilaxis puede realizarse con un glucopéptido más un betalactámico, acompañado del resto de medidas para la descolonización (A-II)*
- *En pacientes colonizados por enterobacterias BLEE, su cobertura en profilaxis debe considerarse sólo en pacientes de alto riesgo (B-III).*

1. **Recomendaciones según el tipo de cirugía**
   1. **Generalidades en cirugía limpia (excluyendo cirugía cardiaca, ortopédica y neuroquirúrgica)**

Se han descrito unos criterios generales a partir de los que se puede prescindir de la profilaxis antibiótica (tabla 6). En general, en cirugía limpia no protésica, de duración inferior a dos horas, sin gran atrición tisular, no es necesario emplear profilaxis, puesto que el riesgo de infección debe situarse muy por debajo del 3%. La profilaxis está indicada cuando se coloca una prótesis o un implante intravascular y cuando los efectos de la infección sean muy graves o irreversibles (endoftalmitis, infección de una malla o de un dispositivo de acceso vascular).

Los antibióticos más utilizados son cefazolina, cefalosporinas de segunda generación o amoxicilina-clavulánico y, en alérgicos a betalactámicos, clindamicina o vancomicina9.

Tabla 6. Criterios para prescindir de la profilaxis antibiótica.

***•*** *Cirugía limpia*

*• Duración < 2 horas*

*• No material protésico*

*• Edad < 65 años*

*• No comorbilidades ni obesidad*

*• No transfusión*

*• No existe infección activa a distancia*

*• La posible ILQ no sería de gravedad*

*Modificado de Mensa y cols* 59

- 1. **Cirugía plástica y dermatológica**

*Términos de búsqueda: “Antibiotic Prophylaxis” AND “Clean Surgery” OR “Dermatologic surgery”.*

La cirugía limpia incluye un amplio abanico de procedimientos que incluyen la cirugía plástica, dermatológica y reconstructiva. El alcance de estos procedimientos varía desde el cierre simple del sitio quirúrgico primario, injertos de piel y colgajos, hasta trasplantes de tejidos. La mayoría de estos procedimientos se asociada a una tasa de ILQ menor del 5%, pero en procedimientos orales, como la escisión en cuña de labio u oreja, colgajos en la nariz, y en cabeza y cuello, se han descritos tasas sobre el 5-10%. Además de los factores de riesgo conocidos para cualquier ILQ, en estas cirugías el riesgo de infección se incrementa en los procedimientos con implantes, cuando se ha realizado irradiación previa, y en los procedimientos por debajo de la cintura9. Los microorganismos contaminantes de la herida quirúrgica provienen de la piel de los pacientes y del entorno del quirófano. Los más frecuentemente aislados en la ILQ en cirugía plástica son *S. aureus*, estafilococos coagulasa negativa y estreptococos. Cuando involucran áreas maceradas y húmedas, cirugías por debajo de la cintura, o pacientes obesos y diabéticos, con frecuencia están también implicados bacilos gramnegativos9.

En este tipo de cirugía la profilaxis antibiótica es controvertida; probablemente juega solo un papel complementario a una adecuada preparación del paciente y una correcta técnica quirúrgica, aunque se ha mostrado indicada en diversas situaciones.

La mayoría de los ECC con placebo y estudios retrospectivos realizados en procedimientos de cirugía plástica no encuentran que la profilaxis antimicrobiana disminuya significativamente el riesgo de infección quirúrgica, tampoco en cirugía facial y nasal sin colocación de implante95–100 .

Un documento de consenso de la Asociación Americana de Cirugía Plástica, basado en metaanálisis de los ECC publicados concluye que los procedimientos de cirugía plástica limpia sin injertos (incluyendo la abdominoplastia) no son tributarios de profilaxis95. Un solo ECC de moderada calidad apoya la profilaxis en la abdominoplastia sin injerto101.

***Recomendaciones de profilaxis***

***Indicación:***

- *No recomendada en cirugía limpia sin implante (D-I).*
- *Recomendada si factores de riesgo (tabla 6) o implante (C-II)*

***Antibiótico:*** *cefazolina (A-II)*

***Alérgicos:*** *vancomicina/teicoplanina o clindamicina (B-II)*

***Duración:*** *una dosis preoperatoria (A-II)*

- 1. **Cirugía de la hernia**

*Términos de búsqueda: “Antibiotic prophylaxis” AND “Hernia repair” OR “Hernia mesh repair” OR “Herniorraphy” OR “Hernioplasty”.*

Existe controversia acerca de la profilaxis en cirugía herniaria por los resultados contradictorios de diversos metaanálisis.

Desde 2007, diversos metaanálisis hallan un efecto protector de la profilaxis en hernioplastia abierta102–104,105. En 2016, otro metaanálisis106 desaconseja la profilaxis rutinaria, pero la encuentra indicada si existen factores de riesgo como recidiva, edad avanzada, inmunosupresión, drenajes o se prevé un tiempo quirúrgico prolongado. Un metaanálisis de 2017107 muestra la superioridad de cefazolina y betalactámicos/inhibidores de la bectalactamasa sobre placebo con una sola dosis preoperatoria, pero no con cefuroxima y fluorquinolonas, sin diferencias entre cada uno de los antimicrobianos utilizados.

En cuanto a la vía laparoscópica, varios estudios han obtenido tasas significativamente más bajas de ILQ108,109. En hernia incisional o eventración, hay también una tasa más baja por vía laparoscópica110. La Asociación Europea de Cirugía Endoscópica (EAES)111 considera que no existe evidencia para apoyar el uso rutinario de profilaxis en hernioplastia laparoscópica y la European Hernia Sociaty (EHS) considera que en este caso el NNT tiende a infinito112.

A partir de la evidencia disponible y ante la dificultad de predecir alguno de los factores de riesgo en el período preoperatorio, se recomienda la profilaxis en herniorrafia y hernioplastia inguinal abierta y en el resto de las hernioplastias abdominales (por inferencia a partir de la evidencia en hernia inguinal).

Se recomienda una dosis única de cefalosporina de primera generación. En pacientes colonizados por SARM es razonable añadir una dosis única preoperatoria de vancomicina (ver apartado 4.5). En pacientes alérgicos a betalactámicos, la alternativa incluye clindamicina y vancomicina.

***Recomendaciones de profilaxis***

***Indicación:***

- *Recomendada en herniorrafia y hernioplastia inguinal abierta (B-I)*
- *Recomendada en el resto de las hernioplastias abdominales abiertas (por inferencia a partir de la evidencia en hernia inguinal) (B-II)*
- *No recomendada en hernioplastia inguinal por vía laparoscópica (D-I)*

***Antibiótico:*** *cefazolina (A-I) + vancomicina en colonizados por SARM (B-III)*

***Alérgicos:*** *vancomicina/teicoplanina o clindamicina (B-II)*

***Duración:*** *una dosis preoperatoria (A-I)*

- 1. **Cirugía de mama y cirugía oncoplástica**

*Términos de búsqueda: “Antibiotic prophylaxis” AND “Breast surgery” OR “Breast cancer surgery” OR “Breast reduction surgery”.*

En ambos casos los microoorganismos responsables de las ILQ son S. *aureus*, otros estafilococos y estreptococos. En pacientes diabéticas u obesas con maceración en axila o pliegues cutáneos pueden hallarse *P. aeruginosa, Serratia marcescens* y enterobacterias (*E. coli, Klebsiella* spp, *P. mirabilis*). Los implantes mamarios por indicación estética o después de una reconstrucción mamaria por neoplasia presentan una tasa de ILQ entre el 2%-2,5%, habiéndose identificado como factores de riesgo la cirugía de reconstrucción mamaria en un tiempo, la quimioterapia y radioterapia neoadyuvante y la biopsia preoperatoria previa a la cirugía113.

La profilaxis es eficaz en la cirugía oncológica de mama sin reconstrucción, con una reducción de la incidencia de ILQ (RR 0,67, IC95% 0,53-0,85)114. Las pacientes sometidas a reconstrucción inmediata tienen más riesgo de infección y en ellas la profilaxis también ha demostrado su eficacia113, al igual que en la cirugía de reducción de mama115 y en los implantes con fines estéticos116. Los antibióticos utilizados son cefazolina o amoxicilina-clavulánico en dosis única, y clindamicina o vancomicina como alternativa en alérgicos a betalactámicos. En alérgicos sometidos a cirugía por debajo del ombligo, puede considerarse añadir gentamicina para cubrir enterobacterias.

***Recomendaciones de profilaxis***

***Indicación:***

- *Recomendada en cirugía de oncológica de mama si factores de riesgo o neoadyuvancia (A-II)*
- *Recomendada en cirugía de reconstrucción oncoplástica (A-I)*
- *Recomendada en cirugía estética (aumento, reducción) (B-II)*

***Antibiótico:*** *cefazolina (A-I)*

***Alérgicos:*** *clindamicina o vancomicina (B-II)*

***Duración:*** *una dosis preoperatoria (A-I)*

- 1. **Cirugía cardíaca y vascular**
     1. **By-pass aortocoronario y recambio valvular**

*Términos de búsqueda: “Antibiotic prophylaxis” AND “Cardiothoracic surgery” OR “Cardiac surgery” OR “Nonvalvular cardiovascular surgery”.*

La ILQ, incluyendo la mediastinitis y la infección de la esternotomía, son complicaciones graves pero que ocurren infrecuentemente después de un bypass aortocoronario o un recambio valvular117. Varios estudios han demostrado que la profilaxis antibiótica en este tipo de procedimientos disminuye de manera eficaz la tasa de infección asociada14.

Se han identificado numerosos factores de riesgo asociados a complicaciones infecciosas post-procedimiento. Los más consistentes son: diabetes, hiperglicemia, enfermedad vascular periférica, enfermedad pulmonar obstructiva crónica, obesidad, insuficiencia cardíaca, edad avanzada, necesidad de una reintervención, duración prolongada del procedimiento y la colonización nasal por *S. aureus*. Casi dos tercios de los microorganismos que ocasionan una infección post-procedimiento en este contexto son cocos grampositivos incluyendo *S. aureus*, estafilococos coagulasa negativa y más raramente *Cutibacterium* (*Propionibacterium) acnes*. Por lo tanto, la profilaxis debe ir encaminada a proporcionar cobertura frente a estos patógenos. Los microorganismos grampositivos multiresistentes o los microorganismos gramnegativos (Enterobacterias, *Pseudomonas* spp, o *Acinetobacter* spp.) están implicados menos frecuentemente. De manera general, en pacientes colonizados por microorganismos multiresistentes o con infecciones previas se debe individualizar la profilaxis antibiótica (ver punto 4.5, profilaxis en pacientes colonizados).

Las cefalosporinas de primera y segunda generación han sido los antimicrobianos más utilizados. En un metaanálisis que comparaba la profilaxis con cefalosporinas y glucopéptidos se demostró un aumento de infecciones por grampositivos en los pacientes tratados con glucopéptidos, aunque en este grupo se diagnosticaron menos infecciones causadas por microorganismos multi-resistentes18. No hay una evidencia clara que apoye el uso de un glucopéptido como profilaxis en instituciones con una prevalencia elevada de *S. aureus* meticilín resistente (SARM). La profilaxis con glucopéptidos más betalactámicos ha demostrado reducir las tasas de ILQ en pacientes colonizados por *S. aureus* cuando se combina junto a la descolonización tópica del paciente90,92. La alternativa a los betalactámicos en pacientes alérgicos sería vancomicina o clindamicina118. La adición de un aminoglucósido puede ser razonable en los casos en que se quiera extender la profilaxis para dar cobertura a microorganismos gramnegativos16.

La duración óptima de la profilaxis no está bien establecida, variando según las recomendaciones entre una dosis única o la administración durante 24 horas. En un metaanálisis se sugiere que la eficacia de la profilaxis puede ser mayor si se extiende al menos durante las 24 horas post-procedimiento119. Sin embargo, los resultados no son concluyentes debido a la heterogeneicidad de los antimicrobianos utilizados. Lo que parece claro es que la profilaxis debe extenderse al menos mientras dure el procedimiento120. Un estudio ha demostrado que para mantener la concentraciones de cefazolina durante todo el procedimiento en un paciente con función renal normal se precisa administrar la cefazolina al menos cada 3 h55. Otro trabajo demuestra que en la población pediátrica, es necesario administrar una dosis adicional de cefazolina tras el inicio de la cirugía para mantener niveles séricos adecuados de antibiótico54.

La práctica de extender la profilaxis hasta que se retiran todos los drenajes y catéteres no está recomendada entre otras cosas por motivos de selección de microorganismos multi-resistentes, superinfecciones y toxicidad farmacológica.

No existe evidencia sobre la profilaxis en procedimientos cardíacos percutáneos como los cateterismos ni arteriografías. En general se recomienda fuertemente mantener las medidas de asepsia al canalizar un acceso arterial121.

Tampoco existe evidencia disponible acerca de la profilaxis antibiótica antes de la implantación de una válvula cardíaca por vía transaórtica o TAVI (transcatheter aortic valve implantation). Es una técnica reciente, y aunque la incidencia de infección no es muy alta y en la mayoría de los casos el origen de la infección parece estar relacionada con una bacteriemia en otro origen y no con el procedimiento en sí, parece razonable por la morbimortalidad asociada que conllevaría una infección la administración de una dosis de antibiótico antes del procedimiento122,123, siendo la práctica recomendada en las guías124. Se ha utilizado cefazolina y vancomicina en alérgicos a betalactámicos, aunque algunos autores preconizan el uso de amoxicilina/ácido clavulánico para tener cobertura frente a *E. faecalis*, sobre todo cuando se utiliza el acceso femoral125.

***Recomendaciones de profilaxis***

***Indicación:***

- *No recomendada en procedimientos cardíacos percutáneos (D-II)*
- *Recomendada en recambio valvular abierto y bypass aortocoronario (A-I) y en la implantación valvular transaórtica (B-III)*

***Antibiótico:*** *cefazolina o cefuroxima (A-I)*

***Alérgicos:*** *vancomicina (A-II)*

***Duración:*** *una dosis preoperatoria (A-I).*

*Administrar 1 g cada 3 horas durante el procedimiento, no continuar tras el cierre (A-II).*

- - 1. **Inserción de marcapasos y desfibriladores**

*Términos de búsqueda: “Antibiotic prophylaxis” AND “Pacemaker” AND “Cardioverter defibrillator”.*

La tasa de infección asociada a inserción de marcapasos oscila en torno a 0,44%117. Se han descrito varios factores de riesgo entre los que destacan la fiebre durante las primeras 24 horas post-inserción, el uso de corticoides durante más de un mes en el año previo a la inserción, y la necesidad de una reintervención debido a hematoma o recambio de los cables120,126,127. La profilaxis antibiótica ha demostrado ser eficaz en varios estudios y en un metaanálisis128. Los betalactámicos han sido los antibióticos más frecuentemente utilizados, administrándose en la mayor parte de los estudios una sola dosis prequirúrgica o hasta cuatro días después del procedimiento. Las guías de la AHA recomiendan la administración de una sola dosis de antibiótico pre-procedimiento129.

No existe evidencia de calidad acerca de la administración de profilaxis en la implantación de dispositivos de asistencia ventricular130. La profilaxis se realiza por inferencia de la cirugía cardíaca e implantación de marcapasos. Un estudio retrospectivo no mostró más riesgo de infección en los tratados con 1 sóla dosis que en los tratados con varias dosis de antibióticos131.

***Recomendaciones de profilaxis***

***Indicación:*** *Recomendada en inserción de marcapasos y desfibriladores (A-I)*

***Antibiótico:*** *cefazolina o cefuroxima (A-I)*

***Alérgicos:*** *vancomicina (A-II)*

***Duración:*** *una dosis preoperatoria (A-I)*

- - 1. **Implantación de catéteres de acceso vascular central**

*Términos de búsqueda: “Antibiotic prophylaxis” AND “Catheter-related” OR “Indwelling catheter” OR “Central venous catheter intravascular catheter” OR “Long-term catheter”.*

La profilaxis con teicoplanina antes de la inserción de un catéter venoso central tunelizado en un ensayo clínico aleatorizado que incluyó 88 pacientes oncohematológicos se asoció con una disminución de las infecciones del punto de inserción, tunelitis y bacteriemia por grampositivos132. La profilaxis antibiótica pre-inserción del acceso vascular no supuso una reducción en las tasas de infección asociada en otro estudio que incluía 55 pacientes no oncológicos133. La profilaxis con teicoplanina en un ensayo clínico aleatorizado con 65 pacientes oncohematológicos no redujo las tasas de infección relacionada con catéter134. En otro ensayo clínico aleatorizado que incluyó 98 pacientes, la profilaxis con vancomicina no redujo la tasa de bacteriemia135.

En un metaanálisis publicado en 2013 y revisado en 2015 que incluía 11 estudios con 828 pacientes se analizó la eficacia del uso profiláctico de antibióticos antes de la inserción o utilización de un catéter intravascular para prevenir la bacteriemia por grampositivos136. Cinco de los estudios incluidos en el anterior metaanálisis136, no encontraron diferencias en el número de casos de bacteriemia asociadas entre un grupo de pacientes en los que se administró vancomicina, teicoplanina o ceftazidima sistémico frente a otro grupo en el que no se administró profilaxis. Seis de estos estudios demostraron que el sellado antibiótico con vancomicina, amikacina o taurolidina más heparina versus sellado con heparina después del uso de un catéter intravascular, disminuía de manera significativa el número de bacteriemias asociadas al dispositivo. Para una prevalencia de infección asociada de un 15% calcularon que era necesario tratar a 12 pacientes para prevenir 1 caso de bacteriemia. En este trabajo se concluye que con esta evidencia sólo estaría justificado emplear esta medida en pacientes de alto riesgo o en aquellas unidades donde la tasa de infección supere el 15%. Un trabajo evaluó el sellado profiláctico con etanol al 70% como parte de un programa de paquete de medidas en niños con resección intestinal demostrando una reducción significativa en el número de bacteriemias asociadas al dispositivo137. En este trabajo es difícil evaluar el papel del sellado ya que este se realizó como parte de un paquete de medidas preventivas.

En el caso de los catéteres tunelizados, la colonización y subsiguiente infección se produce habitualmente por colonización de las conexiones debido a la manipulación138. Por otra parte, la administración profiláctica de glucopéptidos se ha relacionado con la emergencia de microorganismos resistentes, por lo que su uso en profilaxis se desaconseja en muchas guías139.

***Recomendaciones de profilaxis***

***Indicación:***

- *No recomendada en inserción catéteres vasculares centrales (D-I).*
- *No recomendado el sellado antibiótico de manera rutinaria antes de insertar o manipular un catéter intravascular (D-I).*
  - 1. **Cirugía vascular periférica (percutánea y abierta)**

*Términos de búsqueda: “Antibiotic prohylaxis” AND “Perpheral arterial surgery” OR “Vascular surgery”.*

Las infecciones tras procedimientos vasculares periféricos son muy poco frecuentes, aunque si aparecen originan una gran morbilidad y una no desdeñable mortalidad140, por lo que el uso de profilaxis se recomienda en aquellos procedimientos que implican la colocación de material protésico o en aquellos procedimientos de alto riesgo como la reparación de aneurismas, la trombendarterectomía o los bypasses venosos141.

Los principales microorganismos implicados en las infecciones asociadas a estos procedimientos incluyen *S. aureus*, estafilococos coagulasa negativa y bacilos gramnegativos entéricos. Hay varios estudios que han evaluado el papel de la colonización por SARM en pacientes sometidos a procedimientos vasculares142. Los factores de riesgo independiente asociados con infección por SARM son colonización previa, reparación extravascular de aneurismas aórticos y bypasses del miembro inferior143.

Los pacientes que son sometidos a procedimientos braquiocefálicos (endarterectomía carotídea, reparación de la arteria braquial) sin implantación de material protésico no parecen beneficiarse de la profilaxis antibiótica144. No hay estudios bien diseñados en procedimientos vasculares periféricos, por lo que si se quiere administrar profilaxis debido a factores de riesgo del paciente145, se recomienda utilizar los mismos esquemas recomendados en cirugía cardíaca. Los factores de riesgo que se asocian a la colocación de stents vasculares incluyen la duración prolongada del procedimiento (más de dos horas), reintervenciones en el mismo sitio quirúrgico, stents colocados en extremidades inferiores, presencia de hematomas, pacientes portadores de otros dispositivos intravasculares o pacientes inmunosuprimidos146. Un metaanálisis de pacientes sometidos a reconstrucciones arteriales periféricas con aloinjertos o injertos protésicos encontró una reducción de la tasa de infección con la utilización de profilaxis preprocedimiento (RR 0,25; IC 95%: 0,17–0,38; p ≤0,001)147.

Aquellos pacientes a los que se coloca un acceso para hemodiálisis pueden beneficiarse de la administración de profilaxis específica antiestafilocócica. En un estudio se demostró que la tasa de infección tras la colocación de una fístula AV en la extremidad superior fue menor en el grupo control (profilaxis con vancomicina) que en el placebo (1% versus 6%, p= 0,006)141.

La cefazolina es el agente preferido en la mayoría de los estudios por ser el fármaco con mejor relación coste-eficacia. En un estudio no se encontraron diferencias entre cefazolina y cefuroxima en pacientes sometidos a procedimientos vasculares en extremidades inferiores148. Otros estudios no han encontrado diferencias entre ceftriaxona y cefazolina o entre ciprofloxacino oral y cefuroxima iv. No hay muchos datos sobre la profilaxis de elección en pacientes alérgicos a betalactámicos, aunque los agentes más utilizados han sido la vancomicina y la clindamicina. Si se pretende añadir cobertura frente a microorganismos gramnegativos (si el procedimiento implica la aorta abdominal o una incisión en región inguinal) se puede añadir un aminoglucósido a la pauta profiláctica.

Respecto a la duración, en un metaanálisis de tres ensayos clínicos aleatorizados no se demostró beneficio con la prolongación de la profilaxis más de 24 horas post-procedimiento (RR 1,28; IC 95%: 0,82–1,98)147. En otros estudios no se demostró benefico al prolongar la profilaxis con cefuroxima durante 3 días149, o con amoxicilina-clavulánico durante 5 días150. En general, todos los trabajos recomiendan una dosis única profiláctica o una duración máxima de 24 h en los procedimientos vasculares en los que se administre profilaxis, independientemente de la presencia de drenajes.

***Recomendaciones de profilaxis***

***Indicación:*** *Recomendada en un procedimiento vascular de alto riesgo incluyendo aquellos en los que se va a implantar algún tipo de material protésico (A-I)*

***Antibiótico:*** *cefazolina (A-I). Se sugiere añadir un segundo antibiótico con actividad frente a bacilos gramnegativos (gentamicina) (B-III) si existe riesgo de exposición a microbiota intestinal.*

***Alérgicos:*** *vancomicina (B-II) o clindamicina (C-III).*

***Duración:*** *una dosis preoperatoria (A-I)*

- 1. **Cirugía oftálmica**

# *Términos de búsqueda: “Antibiotic prophylaxis” AND “Ophthalmic surgery” OR “Intraocular surgery” OR “Cataract****surgery” OR “Lacrimal surgery” OR “Post-traumatic endophthalmitis” OR “Post-traumatic open globe-injury”***

Los procedimientos oftálmicos incluyen extracciones de cataratas, vitrectomías, queratoplastias, implantación intraocular de lentes, procedimientos de glaucoma, estrabotomías, cirugía del desprendimiento de retina, queratomileusis *in situ* y queratectomía subepitelial asistidas por láser. La mayoría de los datos disponibles con respecto a la profilaxis antimicrobiana implican procedimientos de cataratas.

El objetivo principal de la profilaxis antimicrobiana es reducir la endoftalmitis postoperatoria aguda. Los datos sobre la eficacia de la profilaxis antimicrobiana en procedimientos oftálmicos para prevenir la endoftalmitis son limitados y la baja tasa de endoftalmitis postoperatoria dificulta obtener un tamaño muestral adecuado en los estudios que permitan demostrar dicha eficacia. En este sentido, son utilizados como marcadores indirectos la erradicación de bacterias de la flora normal y la reducción del recuento de bacterias en la conjuntiva, borde superior e inferior de los párpados, pestañas y canto interno del ojo9.

Los microorganismos más frecuentemente implicados en las endoftalmitis postoperatorias tras el procedimiento de cataratas son los *Staphylococcus* coagulasa negativos (entre 25-60%), principalmente *S. epidermidis*. Otros microorganismos Gram positivos identificados incluyen *S. aureus*, *Streptococcus* spp., *Enterococcus* spp., *Cutibacterium* (*Propionibacterium) acnes* y *Corynebacterium* spp. Los microorganismos Gram negativos aislados incluyen especies de *Serratia, Klebsiella* spp., *Proteus mirabilis* y *Pseudomonas aeruginosa*. Estos microorganismos representan la flora normal preoperatoria más frecuentemente aislada151,152.

La antisepsia preoperatoria con povidona yodada es una medida universalmente recomendada y el uso de antibióticos intracamerales administrados a la conclusión de la cirugía muestran fuerte evidencia y alto nivel de recomendación en la cirugía de cataratas para minimizar el riesgo de infección. La mayoría de los trabajos utilizaron cefuroxima o cefazolina, pero en base a la evidencia disponible, no pueden hacerse recomendaciones específicas respecto a la elección del antimicrobiano y duración de la profilaxis. Como principio general, los antibióticos utilizados deben proporcionar cobertura frente a los microorganismos que producen infección ocular con más frecuencia, como estafilococos y bacterias Gram-negativas, en particular especies de *Pseudomonas*9,152–163*.* Estas mismas medidas de profilaxis antimicrobiana presentan una evidencia algo menor en cirugía de glaucoma/injertos corneales y traumatismo penetrante del ojo164,165.

En los traumatismos penetrantes oculares, la endoftalmitis ocurre hasta en un 13% de los casos, siendo la etiología más frecuente las especies de estafilococos, estreptococos y *Bacillus cereus* (éste hasta en un 25%). El riesgo de endoftalmitis se ha asociado a la presencia de cuerpo extraño intraocular, traumatismo en zona rural, lesión del cristalino, y retraso en el cierre de la herida ocular166. Una revisión sistemática y metaanálisis de 3 ECC con bajo riesgo de sesgos167 y un estudio de retrospectivo168 han demostrado la utilidad de la inyección intravítrea de antibióticos en la prevención de la endoftalmitis junto a la profilaxis sistémica con vancomicina más ceftazidima. Sin embargo, la difusión de los antibióticos desde el plasma al vítreo es escasa y no se alcanzan concentraciones suficientes para tratar o prevenir una infección, sobre todo para antibióticos hidrofílicos como aminoglucósidos, glucopéptidos y betalactámicos; linezolid y levofloxacino si pueden alcanzar concentraciones suficientes169. En resumen, en casos de herida penetrante sucia y con factores de riesgo de endoftalmitis estaría indicado el tratamiento antibiótico intravítreo e intravenoso teniendo en cuenta la difusión de estos en el humor acuoso, y en el resto, con la profilaxis operatoria sería suficiente.

La evidencia existente para la profilaxis antibiótica en la cirugía lagrimal es menos consistente.

***Recomendaciones de profilaxis en cirugía de cataratas***

***Indicación:*** *Recomendada la administración intracameral inmediatamente tras la extracción de la catarata (A-I)*

***Antibiótico:*** *cefuroxima o cefazolina intracameral (A-I).*

***Alérgicos:*** *vancomicina o moxifloxacino intracameral (A-III)*

***Duración:*** *una dosis (A-I)*

***Recomendaciones de profilaxis en cirugía de glaucoma/injerto corneal***

***Indicación:*** *Recomendada la administración intracameral por inferencia de la cirugía de catarata (A-II)*

***Antibiótico:*** *cefuroxima intracameral (A-I).*

***Alérgicos:*** *vancomicina o moxifloxacino intracameral (B-III)*

***Duración:*** *una dosis (A-I)*

***Recomendaciones de profilaxis en traumatismo penetrante del ojo***

***Indicación:*** *Recomendada la inyección intravítrea (A-I)*

***Antibiótico:*** *gentamicina + clindamicina (A-II)*

***Alérgicos:*** *gentamicina + vancomicina (A-III)*

***Duración:*** *una dosis preoperatoria (A-I)*

***Recomendaciones de profilaxis en cirugía de lagrimal***

***Indicación:*** *Recomendada (A-III)*

***Antibiótico:*** *cefazolina o cefuroxima (A-III)*

***Alérgicos:*** *vancomicina (B-III)*

***Duración:*** *una dosis (A-I)*

- 1. **Procedimientos neuroquirúrgicos**

*Términos de búsqueda: “Antibiotic prophylaxis” AND “Neurosurgery” OR “Craniotomy” OR “Cerebrospinal fluid-shunt surgery” OR “External ventricular drains” OR “Intracranial pressure monitors” OR “Transsphenoidal surgery”.*

Los procedimientos neuroquirúrgicos incluyen la cirugía limpia (craneotomía, colocación de derivaciones y drenajes ventriculares de LCR y de sensores de presión intracraneal) y la limpia-contaminada (cirugía a través de senos paranasales y faringe). La cirugía espinal se abordará en los procedimientos ortopédicos.

Los microorganismos más comúnmente implicados en la ILQ en la mayoría de los estudios son los gram-positivos, *S. aureus* y SCN, algunos con altas tasas de resistencia a meticilina9. *C. acnes* puede estar también implicado en infecciones de derivaciones de LCR y craneotomías. Los bacterias gram-negativas pueden estar implicadas también en un 5-8% de los casos, a veces en infecciones polimicrobianas9 .

- - 1. **Craneotomía**

Varios metaanálisis demuestran que la profilaxis antibiótica disminuye la tasa de infección tras la realización de una craneotomía, tanto en la aparición de ILQ como en el desarrollo de meningitis170,170,171.

No existe acuerdo acerca de qué tipo de profilaxis utilizar, ya que han sido evaluados diferentes regímenes de antibióticos en varios estudios demostrando ser efectivos tanto en dosis única como en dosis múltiples (como cefazolina, cefotiam, cefuroxima, cloxacilina, amoxicilina-ácido clavulánico, cefalosporinas de 3ª generación, trimetroprim-sulfametoxazol)172–175. En un metaanálisis no se encontraron diferencias significativas en la tasa de meningitis post-craneotomía entre varios regímenes de antibióticos, ni en la duración de la profilaxis171 .

Las cefalosporinas de 1ª o 2ª generación parecen una buena opción, además en el metaanálisis de *Liu et al,* las *c*efalosporinas de 3ª generación no demuestran superioridad sobre el antibiótico convencional tanto en infección de herida superficial como profunda en procedimientos neuroquirúrgicos176.

Un metaanálisis publicado recientemente concluye que las lincosaminas, glucopéptidos, cefalosporinas de 3ª generación y derivados de penicilinas tienen mejor cobertura para las ILQ en esta cirugía que las cefalosporinas de 1ª generación, pero sólo incluye un ECC y 6 series de casos (algunos de 1974), y en éstos últimos, pacientes de alto riesgo, por tanto los resultados no son extrapolables177 .

***Recomendaciones de profilaxis***

***Indicación:*** *Recomendada en craneotomía (A-I)*

***Antibiótico:*** *cefazolina (A-I)*

***Alérgicos:*** *vancomicina o clindamicina (A-II)*

***Duración:*** *una dosis (A-I)*

- - 1. **Colocación de derivación ventrículo-peritoneal o ventrículo-auricular (DVPA) y drenaje ventricular externo (DVE)**

Una de las principales complicaciones de las derivaciones de LCR son las infecciones. Se han referido incidencias variables entre el 5 al 10%, aunque pueden alcanzar hasta un 40%. Varios metaanálisis encuentran que existe una disminución estadísticamente significativa en la incidencia de infecciones de DVPA de LCR cuando se utiliza la profilaxis antibiótica178–180.

El efecto de la profilaxis parece estar relacionado con la tasa de infección inicial, no siendo útil cuando es muy baja (<5%)179.

La profilaxis con vancomicina reduce la tasa de infección de DVPA en centros y/o servicios con alta prevalencia de infección por SARM181.

La utilidad de la profilaxis antibiótica en los pacientes con drenaje ventricular externo ha sido objeto de debate. En una encuesta internacional realizada a diferentes especialistas sobre la profilaxis antibiótica en DVE, era recomendada por la mayoría de neurocirujanos (73,5%) comparado con los intensivistas (59%) e infectólogos (35%). Recientemente, en una revisión sistemática se ha observado que la profilaxis antibiótica en DVE disminuye el riesgo de infección (RR: 0,45 (95% IC, 0,27-0,74, p=0,02)182.

La profilaxis antibiótica continua en DVE no ofrece beneficio sobre profilaxis perioperatoria, por tanto su discontinuación reduce costes y evita la aparición de resistencias183.

***Recomendaciones de profilaxis***

***Indicación:***

- *Recomendada en la colocación de derivación ventrículo-peritoneal y ventrículo-auricular (A-I)*
- *Recomendada en de drenaje ventricular externo (B-I)*

***Antibiótico:*** *cefazolina (A-I). En caso de alta prevalencia de SARM: vancomicina (A-I)*

***Alérgicos:*** *vancomicina (A-II)*

***Duración:*** *una dosis (A-I)*

- - 1. **Colocación de sensor de presión intracraneal (PIC)**

Los factores de riesgo relacionados con la infección de sensor de PIC son la duración mayor de 5 días, la presencia de ventriculostomía, fístula de LCR, infección concomitante y/o recambios de sensor PIC. Sin embargo, la utilización de profilaxis antimicrobiana no parece disminuir la tasa de infección en base a estudios de cohortes retrospectivos184–187.

No existen estudios controlados randomizados que nos permitan demostrar su utilidad184–189.

***Recomendaciones de profilaxis***

***Indicación:*** *No se recomienda para la colocación de sensor de presión intracraneal (D-II)*

- - 1. **Cirugía a través de senos paranasales o faringe**

Existen varios estudios retrospectivos de serie de casos en cirugía trans-esfenoidal en las que se analizan diferentes pautas de profilaxis antibiótica con tasas muy bajas de infección190–194.

En un estudio controlado aleatorizado, doble ciego, donde se comparan 2 pautas de profilaxis antibiótica (ceftizoxima vs vancomicina más gentamicina) en procedimientos neuroquirúrgicos, al analizar un subgrupo de 129 pacientes sometidos a cirugía trans-esfenoidal se observó que la tasa de infección fue muy baja195.

La utilización de profilaxis perioperatoria ultra-corta parece eficaz, segura y barata para la prevención de meningitis tras cirugía trans-esfenoidal193,194. No existen estudios controlados randomizados bien diseñados.

Se han utilizado diferentes pautas de antibioterapia (cefazolina, cefuroxima, ceftizoxima, amoxicilina-ácido clavulánico, vancomicina más gentamicina, clindamicina, ceftazidima más amikacina), pero al no existir estudios comparativos no se puede hacer una recomendación firme. Considerando la microbiología de la orofaringe y la etiología de las infecciones descritas en esta cirugía (enterobacterias, *H. influenzae*, *S. pneumoniae* y otros estreptococos, *S. epidermidis*)196, amoxicilina-ácido clavulánico podría utilizarse en la profilaxis, y en caso de alergia clindamicina o vancomicina asociada a un aminoglucósido190–195.

***Recomendaciones de profilaxis***

***Indicación:*** *Recomendada en cirugía a través de senos paranasales o faringe (A-III).*

***Antibiótico:*** *amoxicilina-ácido clavulánico (A-III).*

***Alérgicos:*** *clindamicina o vancomicina asociada a un aminoglucósido (B-III)*

***Duración:*** *una dosis (A-I).*

- 1. **Cirugía de cabeza y cuello**

*Términos de búsqueda: “Antibiotic prophylaxis” AND “Neck and head surgery”.*

- - 1. **Cirugía limpia: cirugía de glándulas salivares, tiroidectomía, paratiroidectomía, vaciamiento ganglionar, sin entrada en mucosas oral, respiratoria o digestiva.**

*Términos de búsqueda:* *“Thyroid surgery” OR “Parathyroid surgery” OR “Clean neck dissections” OR “Head and neck oncological (OR cancer) surgery”.*

La administración sistémica de antibióticos profilácticos no ha demostrado reducción de las tasas de ILQ en pacientes sometidos a cirugía limpia de cabeza y cuello197–199. Un estudio aleatorizado, doble ciego, multicéntrico de 500 pacientes sometidos a cirugía tiroidea por bocio multinodular o cáncer de tiroides no encontró diferencias en las tasas de infección quirúrgica entre el grupo control respecto al que recibió profilaxis antimicrobiana (0,8% vs. 0,4%)198, no recomendándose la profilaxis antibiótica de forma rutinaria en la cirugía tiroidea. En otro estudio controlado199 que incluyó más de 2000 pacientes se comparó la tasa de infección en pacientes con cirugía tiroidea limpia en los que administró piperacilina o cefazolina no observando diferencias significativas en la tasa de ILQ (0,09% vs. 0,28%; p=0,371). Además, en una reciente revisión sistemática de la literatura200 se pone en evidencia la baja tasa de ILQ relacionada con la tiroidectomía transcervical o con técnicas mínimamente invasivas, reservando la profilaxis antibiótica en casos de abordaje quirúrgico trans-oral al aumentar discretamente el riesgo de infección por tratarse de una cirugía “limpia-contaminada”. Probablemente en pacientes con este abordaje el antibiótico de elección recomendable sería amoxicilina-ácido clavulánico.

Por otro lado en la revisión de Simó201 se observa una baja tasa de infección quirúrgica en otros procedimientos como parotidectomía o resección de glándula submaxilar sin profilaxis antibiótica, por lo que se podría hacer extensivo el grado de recomendación en el resto de cirugía cervical limpia en pacientes sin elevado riesgo de infección quirúrgica.

Cuando este tipo de cirugía va acompañada de disección ganglionar cervical, la extensa exposición de los tejidos puede incrementar el riesgo de infección. Los resultados de los estudios que comparan el uso o no de profilaxis antibiótica en esta cirugía son discordantes. Seven et al202, en un estudio prospectivo encontraron un franco descenso de la infección de herida tras introducir la profilaxis antibiótica con cefazolina en pacientes con linfadenectomía cervical (1,7% vs. 13,3%; p = 0,02). Hecho similar se ha observado en otros 2 estudios retrospectivos con un gran número de pacientes197,203. Sin embargo, un estudio retrospectivo más reciente realizado con 244 pacientes sometidos a 273 cirugías de disección cervical no contaminada encontraron una tasa de ILQ del 3,3% en el grupo que recibieron antibióticos comparado con 0% en el grupo que no lo recibieron204. La ILQ se asoció de forma independiente con el tiempo quirúrgico y con la disección cervical extensa o radical. Dada la ausencia de ensayos controlados, podría considerarse la profilaxis en pacientes con linfadenectomías extensas197,202,203. Dos estudios retrospectivos204,205 y un ensayo clínico206 no demostraron ventajas de la duración de la profilaxis ≤24 h vs ≤7 días, pero no existen estudios comparativos que comparen una dosis única vs 24 horas.

***Recomendaciones de profilaxis***

***Indicación:***

- *No recomendada en cirugía limpia de procedimientos de cabeza y cuello (D-I)*
- *Recomendada en linfadenectomías extensas o cirugía cervical con resección multivisceral (B-II)*

***Antibiótico:*** *cefazolina (B-II)*

***Alérgicos:*** *clindamicina o vancomicina (B-III)*

***Duración:*** *≤24 horas (A-II), posiblemente una dosis sea suficiente (A-III)*

- - 1. **Cirugía limpia-contaminada: amigdalectomía, adenoidectomía, laringuectomía, traqueotomía, y cualquier otra cirugía en la que se realice incisión de la mucosa faringo-laríngea**.

*Términos de búsqueda:* *“Tonsillectomy” OR “Pharyngolaryngeal surgery”.*

La mayoría de las guías y revisiones disponibles en cirugía limpia-contaminada de cabeza y cuello recomiendan la administración de profilaxis antibiótica en la mayoría de los procedimientos201. Sin embargo, en pacientes que se someten a amigdalectomía no parece que muestren beneficio. Estudios controlados207–209 no observan diferencias significativas en la aparición de complicaciones postoperatorias en estos pacientes. Además, las revisiones sistemáticas que han analizado el impacto de la profilaxis en estas cirugías tampoco recomiendan la administración de profilaxis antibiótica de forma sistemática210,211.

En los pacientes que requieren cirugía oncológica por neoplasias de cabeza y cuello se ha observado una elevada tasa de infección quirúrgica por lo que se recomienda la profilaxis antibiótica201. Varios estudios controlados de series pequeñas con diferentes pautas antibióticas, incluyendo cefazolina, ampicilina y cefalosporinas de 3ª generación, han observado un descenso franco de la ILQ tras la administración de profilaxis antibiótica212. La duración de la profilaxis en la cirugía limpia-contaminada de cabeza y cuello se recomienda que no sobrepase las 24 horas213. En pacientes con microcirugía por colgajos miocutáneos tampoco disminuye significativamente la tasa de infección quirúrgica mantener más de 24 horas la profilaxis antibiótica214, por lo que se recomienda mantenerla máximo 24 horas. En estos pacientes, además, la profilaxis con clindamicina se asoció a mayores tasas de ILQ214,215, así como aquellas pautas antibióticas sin actividad frente a microorganimos gram-negativos216 .

***Recomendaciones de profilaxis***

***Indicación:***

- *Recomendada en cirugía de cabeza y cuello limpia-contaminada (A-II), excepto en adenoidectomía y amigdalectomía (D-I)*
- *Recomendada en cirugía de cáncer de cabeza y cuello (A-II)*

***Antibiótico******:*** *amoxicilina-ácido clavulánico (A-III)*

***Alérgicos******:*** *clindamicina más gentamicina (B-III)*

***Duración******:*** *≤24 horas (A-II), posiblemente* *una dosis sea suficiente (A-III).*

- - 1. **Cirugía de senos paranasales y de oído medio**

*Términos de búsqueda****:*** *“Antibiotic prophylaxis” AND “Endoscopic sinus surgery” OR “Clean and clean-contaminated otologic procedures” OR “Cochlear Implantation”.*

***Cirugía endoscópica de senos paranasales***

En un metaanálisis217 se evaluaron 4 estudios controlados sobre la profilaxis antibiótica en la cirugía endoscópica de los senos paranasales sin reducción significativa en la incidencia de infección postoperatoria (RR 0,76 ; IC 95%: 0,64-0,09), por lo que no se recomienda la utilización rutinaria de la profilaxis en la cirugía endoscópica de los senos paranasales.

***Cirugía otológica***.

En una reciente revisión de la literatura sobre la utilidad de la profilaxis antibiótica en varios procedimientos otológicos218 no se recomienda la administración de la profilaxis en la cirugía limpia, que incluye la timpanostomía, timpanoplastia, estapedectomía y la mastoidectomía. La mayoría de los estudios y metaanálisis revisados incluyeron tanto cirugía limpia como contaminada. Sin embargo, en la cirugía limpia-contaminada, como la cirugía del colesteatoma y en caso de otorrea purulenta, el riesgo de infección puede incrementarse hasta 3 veces219. Un estudio retrospectivo que incluyó cirugía contaminada y sucia en la que se administró una dosis única de antibiótico preoperatoria (clindamicina más ceftazidima o clindamicina más gentamicina en alérgicos), se observó un descenso significativo de las infección postquirúrgica (11% vs 1%), pero la mayor parte de los pacientes del grupo de profilaxis se intervinieron de una cirugía clasificada como sucia220. En base a estas evidencias es difícil establecer recomendaciones, pero posiblemente los pacientes con este tipo de cía se beneficien de una dosis única de antibiótico preoperatoria.

En el metaanálisis de Hochman221 se estudia el efecto de los antibióticos tópicos después de retirada de drenajes de timpanostomía en 1344 pacientes de 9 estudios clínicos. Se observa una reducción significativa en la aparición de otorrea postoperatoria en el 48 % de los pacientes (OR 0,518; IC del 95%: 0,39-0,69; p<0,001).

El uso de la profilaxis antibiótica en la cirugía del implante coclear es también controvertido. Algunas guías la recomiendan a pesar de la baja tasa de infección debido a las graves consecuencias que supone una infección. Una revisión sistemática reciente222 pone de manifiesto la existencia de estudios de poca calidad, con dosis y antibióticos diversos, que impide realizar recomendaciones consistentes, y concluyen que se debe individualizar su uso dependiendo de los riesgos del paciente. En general la incidencia de ILQ es baja (3%-4,5%), en 2 estudios en los que se utilizó una dosis única de antibióticos la incidencia fue del 1%223,224. Un estudio caso-control reciente no encontró infecciones ni en los pacientes que no recibieron profilaxis ni en la que lo recibieron, pero se realizó en un solo centro, restrospectivamente225. Por inferencia de la cirugía limpia con colocación de implante su uso estaría recomendado como dosis única preoperatoria.

***Recomendaciones de profilaxis***

***Indicación:***

- *No recomendada en la cirugía endoscópica de los senos paranasales (D-I)*
- *No recomendada en la cirugía limpia otológica (D-I)*
- *Recomendada la aplicación tópica de antibiótico después de timpanoplastia (A-I)*
- *En la cirugía limpia contaminada y contaminada: recomendada (B-III)*
- *En la cirugía con implante coclear: Recomendada (B-III)*

***Antibiótico:***

- *En la cirugía limpia contaminada y contaminada: amoxicilina-ácido clavulánico (B-III).*
- *En el implante coclear: cefazolina (A-II).*

***Alergia:***

- *En la cirugía limpia contaminada y contaminada: clindamicina más gentamicina (C-III)*
- *En el implante coclear:* *clindamicina o vancomicina (C-III)*

***Duración:*** *una dosis en la cirugía limpia contaminada y contaminada (A-II)* *y en el implante coclear (A-I).*

- - 1. **Cirugía maxilo-facial**

**Septoplastia y rinoplastia**

*Términos de búsqueda****:*** *“Antibiotic prophylaxis” AND “Septoplasty/rhinoplasty”.*

La septoplastia y la rinoplastia se consideran cirugías limpias-contaminadas. La primera se refiere a la retirada del cartílago septal, mientras que la segunda se refiere a la retirada o remodelación de los cartílagos nasales, a veces con injertos o prótesis. La incidencia de infección en ambos procedimientos es baja. Varios ECC y metaanálisis no han demostrado beneficios en la administración de profilaxis en la septoplastia, aunque en la mayoría de los trabajos la férula nasal se retiró en menos de 48h218. Tampoco se ha encontró beneficio de la profilaxis en la rinoplastia en 2 ECC, pero no diferenciaban entre rinoplastia simple o compleja (cirugía de revisión, injertos o material protésico)218. Un ECC realizado con 100 pacientes con septorinoplastia compleja encontró una tasa de infección del 7,9% con la administración de 12 días de profilaxis antibiótica vs 18,7% en el grupo placebo226. Dos ECC posteriores en cirugía compleja (364 pacientes), no encontraron diferencias en la administración de una dosis de antibiótico preoperatoria vs 7 días227,228 .

Una revisión sistemática de la literatura reciente tampoco encuentra beneficios en la prolongación de la profilaxis cuando se mantiene la férula nasal229 .

Por tanto, en la cirugía nasal compleja con colocación de prótesis podría estar recomendadala profilaxis antibiótica con una dosis preoperatoria.

***Recomendaciones de profilaxis***

***Indicación:***

- *Septoplastia: No recomendada (D-I)*
- *Rinoplastia simple: No recomendada (D-I)*
- *Rinoplastia compleja (revisión, prótesis): Recomendada (B-II)*

***Antibiótico:*** *cefazolina (B-II) o amoxicilina-ácido clavulánico (B-III)*

***Alérgicos:*** *vancomicina o clindamicina (C-III)*

***Duración:*** *una dosis (A-I)*

**Fracturas maxilofaciales**

*Términos de búsqueda****:*** *“Antibiotic prophylaxis” AND “maxillofacial fractures”.*

La información sobre el impacto de la profilaxis en la cirugía de la reparación de las fracturas maxilofaciales es limitada230. Revisiones como la de Andreasen231 observa un claro beneficio de la administración de profilaxis antibiótica con un descenso de la infección de herida del 53% al 6% (p=0,001), sobre todo en los pacientes con fractura mandibular, pues la frecuencia de infecciones en fracturas zigomáticas y orbitarias es menor.

En un metaanálisis reciente realizado con 7 ECC y 6 estudios de cohortes de pacientes intervenidos de fractura facial no encuentran beneficios en la prevención de la ILQ con la administración de profilaxis postoperatoria comparada con la administración preoperatoria o pre más perioperatoria232, tampoco en el subgrupo de pacientes con fracturas mandibulares ni en la reducción abierta.

***Recomendaciones de profilaxis***

***Indicación:***

*Recomendada en fracturas maxilofaciales, sobre todo en la fractura mandibular que requiera reducción abierta (A-II)*

***Antibiótico:*** *cefazolina (A-II) o amoxicilina-ácido clavulánico (B-III)*

***Alérgicos:*** *vancomicina o clindamicina (B-III)*

***Duración:*** *una dosis (A-I)*

- - 1. **Procedimientos odontológicos**.

*Términos de búsqueda****:*** *“Antibiotic prophylaxis” AND “Tooth extractions” OR “Third molar extraction” OR “Intraoral bone grafting procedures”.*

En una reciente revisión Cochrane233 se analizan los resultados de 18 estudios controlados que incluyeron a 2456 pacientes a los que se les había realizado la extracción del 3ª molar. Los autores observan un posible beneficio de la profilaxis antibiótica respecto a la reducción de las infecciones (NNT = 12) y a la *alveolitis sicca* (NNT = 38) aunque confirman la existencia de un efecto adverso relacionado con la profilaxis cada 21 pacientes sanos. En una reciente revisión234 se observan hallazgos similares, por lo que no recomiendan la administración de profilaxis antibiótica en pacientes sin factores de riesgo de infección y sólo sería recomendable en pacientes con factores de riesgo de ILQ. Se han descrito como factores de riesgo para el desarrollo de alveolitis la edad, la cirugía o la infección previa, el tabaquismo, las enfermedades sistémicas, y la extracción traumática235,236.

Se ha relacionado la contaminación bacteriana en el momento de la inserción del implante dentario como un factor importante para la pérdida del implante, incluso a largo plazo. En una revisión sistemática reciente237 se ha demostrado que la administración preoperatoria de 2 g de amoxicilina disminuye la pérdida del implante dentario, aunque sin un claro impacto en la infección quirúrgica ni en los efectos adversos.

Lindeboom238 analizó el efecto de la profilaxis antibiótica en 20 pacientes que requirieron injerto óseo a través de la cavidad oral. En el grupo placebo dos pacientes presentaron infección del sitio receptor, un paciente en el sitio donante y dos pacientes en ambas localizaciones, mientras que no se observó ninguna complicación infecciosa en el grupo de profilaxis antibiótica, recomendándose la profilaxis antibiótica en los pacientes que requieran colocación de implante óseo a través de la cavidad oral. Se ha comparado la profilaxis antibiótica con clindamicina versus penicilina, sin diferencias en la tasa de infección quirúrgica239.

***Recomendaciones de profilaxis***

***Indicación:***

- *Recomendada en la implantación de injerto óseo a través de la cavidad oral (B-II)*
- *No recomendada en extracción dental en pacientes sin factores de riesgo (D-II)*
- *No recomendada en el implante oral ni la endodoncia (D-II)*

***Antibiótico:****amoxicilina 1 g oral (A-II)*

***Alérgicos:****clindamicina (B-II)*

***Duración:*** *una dosis (A-I)*

- 1. **Cirugía traumatológica y ortopédica**

*Términos de búsqueda****:*** *“Antibiotic prophylaxis” AND “Orthopaedic surgery” OR “Arthroplasty” OR “Fracture” OR “Spine” OR “Amputation”.*

Los procedimientos quirúrgicos traumatológicos y ortopédicos son mayoritariamente cirugías limpias. Aunque las tasas de infección quirúrgica no suelen superar el 2-5%, son complicaciones catastróficas, cuyo tratamiento requiere hospitalizaciones prolongadas, nuevas cirugías, y un elevado consumo de antibióticos, con un importante impacto psíquico y funcional para el paciente9.

Los microorganismos implicados en estas infecciones son mayoritariamente los de la microbiota cutánea. Los más frecuentes son *S. aureus* y estafilococos coagulasa negativa, seguidos por los bacilos gramnegativos, y los estreptococos9. En la cirugía de columna lumbar baja y en la reparación de fracturas de cabeza de fémur (generalmente en ancianos) se producen con más frecuencia infecciones polimicrobianas con implicación de bacilos gramnegativos240,241.

- - 1. **Reducción de fractura cerrada sin material osteosíntesis y otra cirugía limpia ortopédica sin instrumentación.**

La profilaxis antimicrobiana no está recomendada en pacientes sometidos a cirugía limpia ortopédica que no se acompañan de instrumentación, incluida la artroscopia sin ligamentoplastia242–244 (**D-II**). Hay pocos datos recientes que aporten novedades en este tipo de cirugía, si bien algunos autores recomiendan valorar la profilaxis antibiótica en pacientes de riesgo (diabéticos, obesos o con inmunosupresión). No hay estudios para el caso de la ligamentoplastia, pero podrían extrapolarse las recomendaciones realizadas en la artroplastia primaria (**B-III**).

***Recomendaciones de profilaxis***

***Indicación:***

- *No recomendada en cirugía limpia ortopédica sin instrumentación (D-II)*
- *Valorar en pacientes de riesgo, puede valorarse utilizar la profilaxis en caso de ligamentoplastia (B-III), de acuerdo en lo recomendado en la artroplastia*
  - 1. **Reducción de fractura cerrada con material osteosíntesis.**

En la mayoría de los estudios la profilaxis se realizó con una cefalosporina de primera o segunda generación245–249, y en caso de alergia a beta-lactámicos un glucopéptido, en general vancomicina o teicoplanina. Los pacientes con fracturas de cadera suelen ser ancianos, con comorbilidades y muchas veces institucionalizados. Con frecuencia están colonizados por SARM250 y son más frecuentes las infecciones de la herida quirúrgica por este microorganismo251, pero también son más frecuentes las infecciones polimicrobianas con la implicación de bacilos gramnegativos252. Como se ha comentado en el punto 4.5, en pacientes colonizados por SARM la profilaxis con glucopéptidos no ha demostrado reducir la tasa global de ILQ, aunque sí las infecciones producidas por estafilococos resistentes79,80,246, e incluso en algunos trabajos se ha observado un aumento de las tasas globales de ILQ81. La profilaxis realizada con glucopéptidos más betalactámicos ha demostrado reducir las tasas de ILQ sobre todo cuando se combina junto al resto de medidas llevadas a cabo para la descolonización o descontaminación tópica del paciente80,82; por tanto, en caso alta prevalencia o riesgo de infección por SARM, se recomienda utilizar vancomicina o teicoplanina. En caso de utilizar un glucopéptido, se puede añadir un antibiótico activo frente a bacilos gramnegativos si la epidemiología local indica que estos microorganismos son frecuentes (cefazolina o cefuroxima si el pacienye no es alérgico a betalactámicos, o gentamicina si lo es). En los pacientes colonizados por bacilos gramnegativos multirresistentes no existen evidencias que apoyen el cambio de profilaxis, pero podría considerarse añadir por ejemplo gentamicina, si la epidemiología local indica que estos microorganismos son frecuentes240,253. La duración de la profilaxis en base a la mayoría de los trabajos debe ser ≤ 24h, pero posiblemente con 1 dosis preoperatoria sea suficiente247,248. Un ensayo clínico reciente realizado en pacientes con reducción abierta de fracturas cerradas, comparó 83 pacientes tratados con cefazolina <23 h vs 77 pacientes con una dosis preoperatoria más una redosificación si la duración de la cirugía era mayor de 3 h, no encontró diferencias significativas en la tasa de ILQ254.

***Recomendaciones de profilaxis***

***Indicación:****Recomendada en la reducción de fractura cerrada con material osteosíntesis (A-I)*

***Antibiótico:****cefazolina o cefuroxima (A-I).*

*Si riesgo de SARM: vancomicina o teicoplanina (B-II) (más cefazolina o cefuroxima, o gentamicina si riesgo de BGN) (B-III)*

***Alérgicos:****vancomicina o teicoplanina (B-II) (más gentamicina si riesgo de BGN) (B-III)*

***Duración:****≤ 24h (A-I), probablemente una 1 dosis preoperatoria es suficiente (A-II)*

- - 1. **Intervención de fractura abierta.**

La profilaxis antibiótica está indicada en las fracturas abiertas en base a la evidencia disponible255,256. El riesgo de infección quirúrgica aumenta con la mayor complejidad de la fractura abierta, según la clasificación de Gustilo. La administración de la profilaxis antibiótica debe iniciarse lo más precozmente posible, ya que la precocidad en la administración de la primera dosis de antibiótico, desde el momento de la lesión (no desde el momento de la admisión al servicio de urgencias), se asocia con una reducción de la incidencia de infección quirúrgica (se recomienda la administración dentro de las 3h posteriores a la lesión)257,258. La duración de la profilaxis y el tipo de antibiótico no están bien establecidos, ya que la calidad de la evidencia disponible es limitada259–262. Un ensayo clínico realizado en fracturas grado II no encontró diferencias en la incidencia de infección tras la administración de profilaxis con cefuroxima más gentamicina durante 24 h tras el desbridamiento vs 5 días después262. Una revisión sistemática de la literatura sugiere que la duración de la profilaxis más de 24 horas no disminuye el riesgo de ILQ259, pero los datos son muy limitados. Otro metaanális realizado con 5 estudios comparativos (1284 fracturas abiertas) y 27 observacionales (5408 fracturas abiertas) no encuentra diferencias en pautas de más o menos de 72 horas ni de más o menos de 24 horas, categorizando por grado, pero los datos siguen siendo limitados263. Con la evidencia disponible, posiblemente en las fracturas grado I y II sea suficiente la administración de profilaxis hasta las 24 h del desbridamiento y en las fracturas IIIA máximo hasta 72 h o hasta la cobertura de los tejidos blandos (lo que se produzca antes). La mayoría de los estudios están realizados con cefalosporinas de primera generación, y en las fracturas grado III suele añadirse un aminoglucósido para tener cobertura frente a bacilos gramnegativos, pero no hay estudios comparativos bien diseñados. Saveli et al261 en un ECC no ciego compara cefazolina (n=65) con cefazolina más vancomicina (n=65) hasta 24h trás la fijación de la fractura sin encontrar diferencias en las tasas de infección. En un estudio retrospectivo en fracturas grado III comparan cefazolina más gentamicina (n=37) con piperacilina-tazobactam (n=35), sin encontrar diferencias260. Un estudio retrospectivo, publicado recientemente, en pacientes con fractura grado III comparó la profilaxis con cefazolina (n=65) vs cefazolina más aminoglucósido (n=61) sin encontrar diferencias en las tasas de infección, pero sí mayor fracaso renal en el grupo de aminoglucósido (4% vs 10%), no hubo diferencias en el momento de la administración (en la primera valoración 94% vs 91%) ni en la duración de la profilaxis (66 h vs 72 h)264. En otro trabajo retrospectivo, la adición de gentamicina a cefazolina no disminuyó la incidencia de infección, pero tampoco se producjo mayor fracaso renal; éste estuvo asociado a la presencia de hipotensión y de infección quirúrgica265. Por lo contrario, en un estudio realizado con 1.044 militares con fracturas por herida de guerra, la adición de quinolonas o aminoglucósidos a la profilaxis con cefazolina, clindamicina o amoxicilina-ácido clavulánico se asoció a una menor tasa de infección quirúrgica, aunque no de osteomielitis266. Ante la ausencia de mayor evidencia, puede recomendarse una cefalosporina de 1ª o 2ª generación en las fracturas grado I y II o amoxicilina-ácido clavulánico, y la adición de cobertura frente a BGN (aminoglucósido en dosis única diaria) en las fracturas grado III-A. Los pacientes con fracturas grado III-B y C escapan del concepto de profilaxis y son tributarios de tratamiento antibiótico. Las fracturas abiertas habitualmente requieren un desbridamiento quirúrgico inicial y con frecuencia tienen que reintervenirse posteriormente para realizar la fijación definitiva +/- cobertura de partes blandas (fracturas grado IIIB). Aunque no hay estudios que validen este abordaje, puede contemplarse la recomendación (modificada) de la British Association of Plastic, Reconstructive and Aesthetic Surgeons (BAPRAS)267 en el caso de las fracturas abiertas grado III (particularmente IIIB):

- amoxicilina-ácido clavulánico 2g/8h o una cefalosporina de 1ª o 2ª generación/8h iniciado lo más pronto posible tras la lesión (<3h); mantener hasta la cobertura de partes blandas o hasta 72 h (lo que se produzca antes)
- en el 1º desbridamiento, añadir gentamicina (monodosis de 5 mg/kg - peso ajustado) a la pauta previa
- en la hora previa a la cirugía de estabilización de la fractura y cobertura de partes blandas, administrar una única dosis de vancomicina 15 mg/kg o teicoplanina 800 mg más gentamicina (monodosis de 5 mg/kg – peso ajustado).

Dos revisiones sistemáticas de estudios no comparativos268,269, una de ellas con un ensayo clínico pero con sólo 62 casos269, encuentra una reducción significativa de la tasa de ILQ con la administración local de antibiótico además de la antibioterapia sistémica, particularmente en fracturas grado III-B y C, pero la heterogenidad de los estudios hace difícil recomendar una pauta concreta.

***Recomendaciones de profilaxis***

***Indicación:***

*Recomendada en intervención de fractura abierta (A-I)*

***Antibiótico:*** *cefazolina (A-I) o amoxicilina-ácido clavulánico (B-III) (Fracturas grados I y II de Gustilo), añadir aminoglucósido (gentamicina) en las fracturas grado III (B-II).*

***Alérgicos:*** *Vancomicina o clindamicina ± gentamicina (B-III)*

***Duración:*** *Iniciar lo antes posible y mantener en las fracturas grado I-II hasta las 24 h del desbridamiento (A-II) y en las fracturas III-A máximo hasta 72 h o hasta la cobertura de los tejidos blandos (lo que se produzca antes) (B-III)*

- - 1. **Retirada de implantes ortopédicos utilizados como tratamiento de fracturas.**

En este tipo de cirugía, habitualmente se ha considerado innecesaria la administración de profilaxis antibiótica, al tratarse de una cirugía limpia sin colocación de implantes. En un ensayo clínico reciente, la administración de una dosis preoperatoria de 1g de cefazolina no se asoció con un descenso en la incidencia de infecciones quirúrgicas asociadas a la retirada de implantes localizados por debajo de la rodilla; por lo tanto, no hay datos que apoyen esta práctica270. En este estudio, el porcentaje global de infecciones fue más elevado de lo esperable en una cirugía limpia (14%). No está claro si la profilaxis con una dosis de 2g de cefazolina (dosis actualmente recomendada para pacientes de >60 kg) podría ser eficaz.

***Recomendaciones de profilaxis***

***Indicación:***

*No recomendada en retirada de implante ortopédico (D-II)*

- - 1. **Artroplastias (PTC, PTR, megaprótesis tumorales, primarias y revisión).**

La profilaxis antibiótica con una cefalosporina de primera o segunda generación ha demostrado una reducción de la tasa de ILQ49,62,271,272. En caso de alergia a beta-lactámicos, se ha recomendado en diferentes guías la administración de vancomicina, teicoplanina o clindamicina. En un estudio poblacional con pacientes intervenidos de artroplastia de rodilla en el que se utilizó profilaxis con cloxacilina en 72.223 pacientes y con clindamicina en 5.771, se observó mayor tasa de revisiones por infección en el grupo de clindamicina273. En varios metaanalisis y revisiones sistemáticas los glucopéptidos no han demostrado disminuir las infecciones sobre los betalactámicos en la cirugía de artroplastia49,274 o en cirugía ortopédica en general89,90 e incluso ha aumentado el riesgo de infección275,276. Un estudio retrospectivo de cohortes observó un descenso de las infecciones por SARM y SASM cuando se añadó teicoplanina a la profilaxis habitual con cefuroxima277; en otro trabajo retrospectivo (n=1528) en un centro con alta prevalencia de SARM (30%), la adición de vancomicina no redujo la tasa global de infecciones de la herida quirúrgica, pero sí las infecciones por SARM278. Sin embargo, en un estudio retrospectivo ajustado mediante propensitive score, con 33.848 pacientes, la adición de vancomicina al betalactámico no redujo la incidencia global de ILQ ni las producidas por SARM, y se asoció con una mayor tasa de fracaso renal agudo91. Debido al incremento de la prevalencia de infecciones por bacilos gramnegativos, sobre todo en artroplastia de cadera, se ha considerado la adición de un aminoglucósido, como gentamicina, a la profilaxis habitual253, pero se necesitan más estudios para poder recomendar esta pauta, que, además, se ha asociado con mayor fracaso renal agudo279. En cuanto a la duración de la profilaxis antibiótica en artroplastia primaria, un metaánalisis reciente que incluyó 4 ECC con 4036 pacientes, no encontró diferencias en la incidencia de infección entre los que recibían profilaxis postoperatoria o sólo una dosis preoperatoria (3,1% vs 2,3% respectivamente)63; tampoco han encontrado diferencias otros trabajos retrospectivos28,280, en la línea con las recomendaciones de la guía de los CDC5. Debido a la heterogeneidad de los estudios y su bajo poder estadístico el “*Proceedings of International Consensus on Orthopedic Infections*” no se muestra ni a favor ni en contra de la recomendación de una sóla dosis preoperatoria, en espera de los resultados de un ensayo clínico aleatorizado en marcha281. Al cierre de este manuscrito, un metaanálisis de 23 ECC y 9 estudios observaciones de profilaxis en artroplastias, encontró un beneficio de la profilaxis sobre la no profilaxis, pero no encontró diferencias en la incidencia de infección cuando se administraba 1 sóla dosis preoperatoria vs más dosis, tampoco encontró diferencias en la comparación de cefalosporinas de primera generación con otros antibióticos, pero hubo heterogeneidad en los estudios, con alto riesgo de sesgos 282.

En caso de artroplastias de revisión283, y particularmente en casos de reconstrucción con megaprótesis tumoral, algunos estudios sugieren una administración más prolongada284,285, pero debido a su carácter retrospectivo no se pueden hacer recomendaciones de profilaxis más allá de las 24 h. En el segundo tiempo de un recambio en 2 tiempos por una infección protésica, se incrementa el riesgo de infección y de infecciones por microorganismos resistentes, por lo que se recomienda una profilaxis antibiótica de amplio espectro que cubra el microorganismo causante de la infección protésica inicial así como aquellos otros que puedan causar la infección protésica, como por ejemplo un glucopéptido y un beta-lactámico con actividad anti-pseudomónica281.

En caso de utilizar una prótesis cementada, los datos publicados sugieren que el uso de antibiótico mezclado con el cemento reduce el riesgo de infección profunda286. El mayor beneficio se observó en los estudios realizados con gentamicina.

***Recomendaciones de profilaxis***

***Indicación:***

*Recomendada en artroplastias (A-I)*

***Antibiótico:****cefazolina o cefuroxima (A-I).*

***Alérgicos:****Vancomicina o teicoplanina (B-II) (más gentamicina si riesgo de infección por BGN) (B-III)*

***Duración:****≤24h (A-I); probablemente una dosis preoperatoria sea suficiente (A-II). En megaprótesis ≤24 h (A-II).*

- - 1. **Laminectomías y discectomías sin/con instrumentación.**

Un metaanálisis de 6 ECC y un ECC de cirugía ortopédica vertebral evidenciaron la disminución de la incidencia de ILQ con profilaxis antibiótica respecto a placebo287,288. La evidencia disponible apoya el uso de la profilaxis tanto en la cirugía instrumentada como en la no instrumentada, incluyendo fusiones, laminectomías, y cirugía discal mínimamente invasiva.

No hay un antimicrobiano claramente superior para los procedimientos de la cirugía vertebral; los más estudiados son las cefalosporinas de 1ª y 2ª generación. Por su espectro más estrecho sería recomendable cefazolina, y reservar cefuroxima cuando haya riesgo de infecciones polimicrobianas9.

La mayoría de los estudios han demostrado que pautas de profilaxis ≤24h son tan efectivas en la prevención de la infección quirúrgica como pautas más prolongadas289–293 y que no es necesario mantener la profilaxis hasta la retirada del drenaje289,291; aunque probablemente es suficiente la administración de una dosis preoperatoria287,293–295, ya con una sóla dosis frente a placebo se han observado tasas bajas de ILQ287,288.

En caso de alergia a beta-lactámicos, se recomienda la administración de vancomicina, teicoplanina o clindamicina9 juntamente con un antibiótico activo frente a bacilos gramnegativos, sobre todo cuando sea frecuente la presencia de estos microorganismos296. En este sentido, en las cirugías de la región lumbosacra son más frecuentes las infecciones por bacilos gramnegativos y polimicrobianas, y en la cirugía de revisión es más frecuente la infección por microorganismos multirresistentes, sobre todo estafilococos resistentes a meticilina241. En caso de riesgo de SARM, se recomienda utilizar vancomicina o teicoplanina (valorando las consideraciones del punto 5.9.3).

La administración local de polvo de vancomicina sobre la herida quirúrgica al final de la intervención ha sido evaluada en un metaanálisis que, globalmente, mostró un descenso significativo de la incidencia de infección quirúrgica. Este metaanálisis incluyó un ensayo clínico y 13 estudios observacionales retrospectivos, con importante variabilidad entre ellos297. Podría considerarse la adición de vancomicina local para disminuir la incidencia de infección quirúrgica en los procedimientos con mayor incidencia de infección estafilocócica.

***Recomendaciones de profilaxis***

***Indicación:*** *Recomendada en cirugía ortopédica vertebral con/sin instrumentación, incluyendo fusión vertebral, laminectomía y discectomía mínimamente invasiva (A-I)*

***Antibiótico:*** *cefazolina o cefuroxima (A-I)*

***Alérgicos:*** *vancomicina, teicoplanina (B-II) (asociado a gentamicina si riesgo de BGN) (B-III)*

***Duración:*** *≤24h (A-I); probablemente una dosis preoperatoria es suficiente (A-II)*

- - 1. **Amputación de miembros**.

La profilaxis antibiótica está indicada en las amputaciones de extremidades inferiores. Una cefalosporina de primera o segunda generación o amoxicilina-clavulánico son alternativas posibles298.

No hay apenas evidencia sobre la duración de la profilaxis. Un solo estudio (con un diseño quasi-experimental y un tamaño muestral pequeño) sugiere que prolongar la profilaxis más de 24h puede disminuir la incidencia de infección299. En las guías de tratamiento del pie diabético de la IDSA300 se recomienda (con un grado débil de evidencia) mantener de 2 a 5 días la profilaxis en estos pacientes, cuando se realiza una amputación que no deja tejido infectado remanente. A falta de una mayor evidencia en este punto, puede recomendarse la administración de profilaxis durante al menos 24 horas, siempre que no haya tejido infectado remanente post-amputación.

***Recomendaciones de profilaxis***

***Indicación******:*** *Recomendada en amputación de extremidades inferiores (A-II)*

***Antibiótico:****cefazolina o cefuroxima o amoxicilina-ácido clavulánico* *(A-II)*

***Alérgicos:*** *Vancomicina o teicoplanina más gentamicina (B-III)*

***Duración:****al menos ≤24 h (B-III), siempre que no haya tejido infectado remanente post-amputación*

- 1. **Cirugía torácica**
     1. **Cirugía torácica mayor y mínimamente invasiva**

*Términos de búsqueda: “Antibiotic prophylaxis” AND “Non-cardiac thoracic surgery”* *OR “Antibiotic prophylaxis” AND “Thoracic surgery” OR “Lung surgery”.*

Dentro de la cirugía torácica se incluyen procedimientos mayores abiertos como la lobectomía, neumonectomía, resecciones atípicas y toracotomías. También otros procedimientos menos invasivos como la videotoracoscopia (VATS), mediastinoscopia y colocación de tubos torácicos.

Las infecciones más frecuentes en estos pacientes son las de localización quirúrgica, las neumonías y el empiema. En general se trata de cirugías limpias con un índice de infección bajo (< 2%), y éste suele ser menor en los procedimientos mínimamente invasivos que en los abiertos.

Los microorganismos más frecuentemente implicados en las infecciones son Gram positivos (*S. aureus* y *S. epidermidis*), aunque en casos de neumonía nosocomial pueden participar también Gram negativos (*H. influenzae, K. pneumoniae, Enterobacter* spp*, Acinetobacter* spp, etc.) y hongos.

No existe consenso generalizado sobre el mejor agente antibiótico a utilizar, aunque en general la cefazolina (2 g monodosis, i.v) es ampliamente aceptada (junto a amoxicilina-ácido clavulánico), y la vancomicina o clindamicina se consideran buenas alternativas en alérgicos a betalactámicos. En pacientes colonizados por SARM se aconseja utilizar vancomicina por inferencia de las evidencias encontradas en la cirugía cardíaca (ver apartados 4.5 y 5.1).

Se recomienda la profilaxis de forma sistemática en los pacientes que se someten a cirugía torácica mayor, con grado de evidencia A, ya que existen estudios clínicos aleatorizados que demuestran su beneficio frente a placebo301,302. Con respecto a la cirugía mínimamente invasiva la evidencia es menor, aunque por tratarse de los mismos procedimientos se generaliza la profilaxis de la cirugía torácica mayor.

Un ECC aleatorizado demostró que la profilaxis extendida (48 horas) en pacientes sometidos a cirugía torácica programada con colocación de tubos de toracostomía no redujo las complicaciones postoperatorias en comparación con profilaxis preoperatoria (dosis única de cefazolina)303.

***Recomendaciones de profilaxis***

***Indicación:*** *Recomendada en cirugía torácica mayor (A-I)*

***Antibiótico:*** *cefazolina (A-I)*

***Alérgicos:*** *vancomicina/teicoplanina (B-III)*

***Duración:*** *una dosis preoperatoria (A-I)*

***Recomendaciones de profilaxis***

***Indicación:*** *Recomendada en cirugía torácica mínimamente invasiva (videotoracoscopia, mediastinoscopia) (B-III)*

***Antibiótico:*** *cefazolina (A-II)*

***Alérgicos:*** *vancomicina/teicoplanina (B-III)*

***Duración******:*** *una dosis preoperatoria (A-I)*

- - 1. **Colocación de tubo torácico, traumatismo penetrante**

*Términos de búsqueda: “Antibiotic prophylaxis” AND “Thoracostomy” OR “Tube thoracostomy” AND “Penetrating thoracic injuries”.*

En procedimientos como la colocación electiva de tubos torácicos no existe evidencia para recomendar la profilaxis de forma rutinaria.

En situaciones de traumatismo cerrado y penetrante hay controversia, ya que existen resultados divergentes publicados en la literatura. Entre ellos se encuentran estudios retrospectivos304, aleatorizados305,306 y metaanálisis307,308 que globalmente demuestran el beneficio de la profilaxis antibiótica en la colocación de drenajes torácicos en el traumatismo torácico penetrante con grado de evidencia A. En casos de heridas traumáticas penetrantes consideradas sucias está indicada la antibioterapia empírica, no la profilaxis aislada.

En base a los estudios comentados la duración de la profilaxis es de una dosis preoperatoria.

***Recomendaciones de profilaxis***

***Indicación:***

- *No recomendada en la colocación electiva de tubos torácicos (D-II)*
- *Recomendada en caso de traumatismo torácico penetrante (A-I)*

***Antibiótico:*** *cefazolina (A-I)*

***Alérgicos:*** *vancomicina/teicoplanina (B-III)*

***Duración:*** *una dosis preoperatoria (A-I)*

- 1. **Cirugía esófago-gastro-duodenal**

El riesgo de infección en cirugía gastroduodenal es alto cuando se hallan reducidas la acidez gástrica y la motilidad gastrointestinal, mecanismos que, en condiciones normales, inhiben el crecimiento bacteriano en estómago y duodeno. Estos factores se dan en presencia de obstrucción, hemorragia, úlcera gástrica, neoplasia maligna y tratamiento antisecretor que aumente el pH gástrico, lo que incluye la mayoría de los pacientes intervenidos en esta zona del aparato digestivo.

Los microorganismos más frecuentemente aislados en patología gastrointestinal alta son coliformes (*E. coli*, *Proteus* sp, *Klebsiella* sp), estafilococos, *S. viridans*, *E. faecalis* y ocasionalmente *Clostridium* sp., *Bacteroides* sp, *Candida* sp. El esófago normal tiene sólo flora bacteriana de tránsito. Sin embargo, ciertas situaciones (estenosis, estasis) favorecen su colonización bacteriana, por lo que debe plantearse la profilaxis en cirugía de las estenosis benignas o malignas, achalasia y reflujo gastroesofágico.

- - 1. **Con rotura de mucosa (esofaguectomía, gastrectomía, duodeno-pancreatectomía cefálica)**

*Términos de búsqueda: “Antibiotic prophylaxis” AND “Oesophageal surgery” OR “Gastrectomy” OR “Pancreatoduodenectomy”.*

No existe evidencia de calidad para la profilaxis de la cirugía esofágica, por lo que las recomendaciones se realizan por inferencia de la cirugía gástrica.

Varios ensayos clínicos han demostrado la efectividad de la profilaxis en la cirugía gástrica y gastroduodenal309,310. Los antibióticos más utilizados han sido las cefalosporinas de 1ª o 2ª generación, pero también betalactámicos/inhibidores de la betalactamasa, con resultados similares311. La administración de una dosis única se ha mostrado igual de efectiva que duraciones más prolongadas con cefalosporinas de 1ª y 2ª generación312–314, y en un EC reciente amoxicilina-ácido clavulánico fue igual de efectiva durante 24 y 72 horas315 .

***Recomendaciones de profilaxis***

***Indicación:*** *Recomendada en cirugía esofágica (A-II), gástrica (A-I) y gastroduodenal (A-I)*

***Antibiótico:*** *cefazolina (A-I)*

***Alérgicos:*** *vancomicina* *o clindamicina más gentamicina (B-III)*

***Duración:*** *una dosis preoperatoria (A-I)*

- - 1. **Sin rotura de mucosa (cirugía de reflujo gastroesofágico, achalasia, vagotomía)**

*Términos de búsqueda: “Antibiotic prophylaxis” AND “Antireflux surgery” AND “Vagotomy”.*

No existen estudios específicos que se refieran a la profilaxis en este tipo de intervenciones, por lo que las recomendaciones se realizan por extrapolación de estudios realizados con pacientes y situaciones similares9. Dado que no hay apertura de la mucosa, estos procedimientos pueden considerarse cirugías limpias, por lo que no se recomienda administrar profilaxis de forma sistemática. Sin embargo, sí se acepta la profilaxis en pacientes de alto riesgo, tales como obesos mórbidos, pacientes con obstrucción intestinal, hipoclorhidria, hemorragia gástrica, neoplasias, perforación, inmunosupresión o ASA>3. En estos casos la profilaxis indicada sería la descrita para los procedimientos EGD con rotura de mucosa.

***Recomendaciones de profilaxis***

***Indicación:***

- *No recomendada en cirugía esófago-gastro-duodenal sin rotura de mucosa (D-II)*
- *Recomendada en cirugía esófago-gastro-duodenal sin rotura de mucosa en pacientes de alto riesgo (C-III)*

***Antibiótico:*** *cefazolina (A-I)*

***Alérgicos:*** *vancomicina más gentamicina o clindamicina más gentamicina (B-III)*

***Duración:*** *una dosis preoperatoria (A-I)*

- - 1. **Implantación de PEG (gastrotomía percutánea endoscópica)**

*Términos de búsqueda: “Antibiotic prophylaxis” AND “Percutaneous endoscopic gastrostomy”.*

Dos metaanálisis316,317 y varios ensayos clínicos318–322 han demostrado una reducción de las infecciones periostoma cuando se administra profilaxis previo al procedimiento. Se han utilizado diferentes regímenes, principalmente cefalosporinas y penicilinas/inhibidores de la betalactamasa. Fue llamativa la diferencia en el número de infecciones en el grupo placebo. En la mayoría no se describe el microorganismo causante. En un estudio se comparó la profilaxis sola con la profilaxis más un antiséptico local preoperatorio, encontrándose una mayor reducción de ILQ en este último, pero el tamaño muestral fue pequeño323. Ensayos recientes con una nueva técnica para implantar el PEG han demostrado una incidencia similar de infecciones en el grupo tratado y no tratado con antibióticos324,325 .

***Recomendaciones de profilaxis***

***Indicación:***

- *Recomendada en colocación de gastrotomía percutánea endoscópica (A-I)*
- *Se recomienda una buena antisepsia del lugar de implantación (A-III)*

***Antibiótico:****cefazolina o cefuroxima o amoxicilina/clavulánico (A-II)*

***Alérgicos:****vancomicina más gentamicina o clindamicina más gentamicina (B-III)*

***Duración:*** *una dosis preoperatoria (A-I)*

- 1. **Cirugía bariátrica**

*Términos de búsqueda: “Antibiotic prophylaxis” AND “Bariatric surgery”.*

No existen estudios bien diseñados que evalúen la eficacia de la profilaxis antibiótica en la cirugía bariática, sólo un trabajo en cirugía por laparotomía ha demostrado la eficacia de cefazolina frente a placebo326. Actualmente, la mayor parte de la cirugía bariátrica se realiza por laparoscopia, con la consiguiente reducción de la tasa de ILQ. Por otro lado, los estudios de profilaxis realizados en los últimos años se han realizado para comparar diferentes antibióticos y a diferentes dosis. Un estudio de casos y controles327 y dos estudios observacionales328,329 han demostrado que la utilización de antibióticos diferentes de cefazolina se asocia a mayor riesgo de infección. Por extrapolación de procedimientos similares, la cirugía bariátrica es una técnica limpia-contaminada y requeriría profilaxis antibiótica sistémica. En estos pacientes se recomienda administrar la dosis de antibióticos ajustadas a peso (ver apartado 3.3).

***Recomendaciones de profilaxis***

***Indicación:*** *Recomendada en cirugía bariátrica (A-II)*

***Antibiótico:*** *cefazolina o cefuroxima o amoxicilina-ácido clavulánico (A-II)*

***Alérgicos:*** *vancomicina más gentamicina o clindamicina más gentamicina (B-III)*

***Duración:*** *una dosis preoperatoria (A-I)*

- 1. **Cirugía de intestino delgado**

*Términos de búsqueda: “Antibiotic prophylaxis” AND “Small bowel surgery” AND “Small bowel transplantation”.*

Se considera cirugía de intestino delgado las incisiones o resecciones del intestino delgado, incluyendo enterotomía, bypass intestinal y cirugía de estenosis.

No existen ensayos clínicos aleatorizados de profilaxis antibiótica en cirugía de intestino delgado, pero está recomendada la profilaxis al ser una cirugía limpia contaminada, por inferencia de otras cirugías, sobre todo de la colorrectal. Las recomendaciones son las adoptadas por la IDSA, SIS, SHEA, con opiniones de expertos 9,116. Los microorganismos más frecuentemente aislados de las heridas quirúrgicas en cirugía de intestino delgado son bacilos gram negativos (aerobios y anaerobios) de origen intestinal, así como gram positivos (estreptococos, estafilococos y enterococos). La densidad bacteriana es variable, en duodeno oscila entre 101 a 103 UFC y en yeyuno-ileo de 104 a 107 330.

***Recomendaciones de profilaxis***

***Indicación:*** *Recomendada en cirugía del intestino delgado sin y con obstrucción (A-III)*

***Antibiótico:***

- *En la cirugía sin obstrucción: cefazolina (A-I).*
- *En la cirugía con obstrucción: cefazolina má metronidazol (B-II) o amoxicilina-ácido clavulánico (B-III)*

***Alérgicos:***

- *En la cirugía sin obstrucción: clindamicina más gentamicina (B-III)*
- *En la cirugía con obstrucción: metronidazol más gentamicina (B-II)*

***Duración:*** *una dosis preoperatoria (A-I)*

- 1. **Otras cirugías digestivas**
     1. **Esplenectomía**

*Términos de búsqueda: “Antibiotic prophylaxis” OR “Splenectomy”.*

La esplenectomía no traumática se considera una cirugía limpia y, por tanto, no estaría indicada la profilaxis antibiótica rutinaria. Algunos autores la consideran en pacientes de alto riesgo, inmudeprimidos o bajo tratamiento inmunosupresor, en pacientes ancianos con enfermedades debilitantes, cuando la cirugía se prolonga más de 120 minutos y hay una pérdida sanguínea elevada331. La esplenectomía traumática no se considera un procedimiento limpio y debe valorarse la profilaxis. Por inferencia de otras cirugías se recomienda la profilaxis con cefazolina en una dosis única preoperatoria, y en alérgicos a betalactámicos, clindamicina más gentamicina.

***Recomendaciones de profilaxis***

***Indicación:***

- *No recomendada en esplenectomía sin factores de riesgo (D-II)*
- *Recomendada en esplenectomía traumática o electiva con factores de riesgo (B-III)*

***Antibiótico:*** *cefazolina (A-I)*

***Alérgicos******:*** *vancomicina más gentamicina o clindamicina más gentamicina (B-III)*

***Duración:*** *una dosis preoperatoria (A-I)*

- - 1. **Traumatismo penetrante de abdomen**

*Términos de búsqueda: “Antibiotic prophylaxis” AND “Abdominal penetrating trauma” OR “Trauma surgery”.*

No existen ensayos clínicos controlados que avalen el uso de profilaxis antibiótica en el traumatismo penetrante de abdomen332. En uno de los pocos estudios en el que se ha comparado la profilaxis antibiótica con placebo, se encontró una incidencia de ILQ del 7%, 33% y 30% con la administración de la profilaxis preoperatoria, intraoperatoria y postoperatoria, respectivamente333. Los porcentajes de infección fueron mayores cuando el traumatismo afectaba al colon (11%, 57% y 70% para cada uno de los grupos).

No hay ningún estudio que haya demostrado la necesidad de continuar el antibiótico más de 24 horas después de la cirugía si ésta se ha realizado en las primeras 12 horas después del traumatismo. Una guía publicada en 2000 y actualizada en 2012 realiza una revisión sistemática de la literatura (44 estudios) para evaluar la evidencia del mejor régimen antibiótico y su duración334,335, concluyen que con un nivel de evidencia 1, que a todos los pacientes con traumatismo abdominal penetrante se les debe administrar una dosis preoperatoria de antibiótico con cobertura frente aerobios y anaerobios y que la profilaxis se mantendrá no más de 24 horas si existe lesión de víscera hueca en los pacientes con traumatismo agudo. Con un nivel de evidencia 3, en los pacientes con shock hemorrágico la dosis de antibiótico debe ser 2-3 veces mayor, y repetir después de la transfusión o cada 10 unidades de sangre transfundida hasta que deje de sangrar. Después de las 24 horas se incrementa el riesgo de resistencia bacteriana y muerte de infecciones por microorganismos multirresistentes61.

La administración de un único antibiótico con actividad frente a aerobios y anaerobios parece más costo-efectiva. Un metaanálisis de 1991 no mostró diferencias en la incidencia de infección en la profilaxis con betalactámicos vs combinaciones con aminoglucósidos, pero muchos de los antibióticos utilizados en los ensayos no se utilizan actualmente336.

En un estudio retrospectivo en el que se revisaron los aislamientos microbiológicos de infecciones tras traumatismos penetrantes de abdomen (75% de colon y 25% de intestino delgado), *E. coli* fue el microorganismo aislado con más frecuencia (55%), seguido de *Enterobacter cloacae* (26%), *Klebsiella spp*. (17%) y *Proteus mirabilis* (4%)337. *E. coli* y *Bacteroides* spp. predominaron en las lesiones de colon y *Enterobacter* y *Klebsiella* en estómago e intestino delgado337. El segundo microorganismo más frecuente fue *Enterococcus*, encontrado en el 20% de las infecciones. En base a lo publicado y teniendo en cuenta la microbiología probable y las resistencias locales, amoxicilina-ácido clavulánico o cefoxitina/cefazolina/cefuroxima más metronidazol pueden ser una opción, y en caso de alergia a betalactámicos gentamicina más metronidazol.

***Recomendaciones de profilaxis***

***Indicación:*** *Recomendada en traumatismo penetrante de abdomen (A-I)*

***Antibiótico:****cefuroxima más metronidazol (A-I) o amoxicilina-ácido clavulánico (A-II)*

***Alérgicos:*** *metronidazol más gentamicina (A-III)*

***Duración:*** *una dosis preoperatoria (A-I**), ≤24 h si lesión de víscera hueca (A-II)*

- 1. **Apendicectomía**

*Términos de búsqueda: “Antibiotic prophylaxis” AND “Appendicectomy” OR “Surgery for apendicitis”.*

El uso de antibióticos como profilaxis en la apendicectomía está plenamente condicionado a la presencia o no de alguna de las variantes de la apendicitis aguda complicada (absceso, plastrón, peritonitis difusa o perforación). Sin embargo, incluso en los casos en los que se interviene una apendicitis no complicada (entre el 80-85% de los casos), se recomienda emplear profilaxis antibiótica debido a la presencia de los microorganismos que causan habitualmente los cuadros complicados (*E. coli* y *Bacteroides fragilis* principalmente)338. Si bien la tasa de ILQ en casos de apendicitis no complicadas es por lo general baja y no debe superar el 5%, el empleo de la laparoscopia reduce todavía más estas cifras. Paradójicamente, existen series que relacionan el abordaje mínimamente invasivo con tasas más altas de infección de órgano/espacio9.

La mayoría de los estudios comparativos con diferentes pautas de antibióticos se ha realizado anterior a 19909.

El uso de antibióticos como profilaxis en la apendicectomía no complicada (y en la complicada, aunque se considere tratamiento de una infección intraabdominal) reduce claramente la tasa de ILQ en comparación con placebo339. Sin embargo, no se ha conseguido identificar ningún antibiótico que sea claramente superior al resto. El agente debe cubrir microorganismos aerobios entéricos y anerobios. Actualmente no existe evidencia que sustente el uso de antibióticos más allá de la dosis inicial en la apendicectomía no complicada (flemonosa y gangrenosa)17,340,341. La apendicitis perforada es tributaria de tratamiento antibiótico, que puede ser de corta duración (24-72 horas)340,342.

***Recomendaciones de profilaxis***

***Indicación******:*** *Recomendada en apendicectomía no complicada (A-I)*

***Antibiótico:*** *cefuroxima más metronidazol (A-I) o amoxicilina-ácido clavulánico (A-II)*

***Alérgicos:*** *metronidazol más gentamicina (B-III)*

***Duración:*** *una dosis preoperatoria (A-I)*

- 1. **Cirugía colorrectal**

*Términos de búsqueda: “Antibiotic prophylaxis” AND “Elective colorectal surgery” OR “Laparoscopic colorectal surgery” OR “Resection for colorectal cáncer”.*

La cirugía colorrectal presenta las tasas de ILQ más altas de la cirugía gastrointestinal, siendo su frecuencia cercana al 17-20% cuando se registra de manera prospectiva. La cirugía colorrectal electiva puede considerarse limpia-contaminada, si bien puede pasar a ser contaminada durante el acto quirúrgico. El empleo de profilaxis antibiótica disminuye las tasas de complicaciones infecciosas del 30% hasta por debajo del 10%. Dentro de los diferentes procedimientos, las resecciones rectales (especialmente con tiempo perineal) son las que más altas tasas de ILQ presentan9. Si bien el uso y generalización del abordaje laparoscópico ha contribuido a disminuir la aparición de infecciones343, otros factores como la duración de la cirugía, desnutrición, inmunodepresión, transfusión peroperatoria, hipotermia, hiperglucemia y obesidad contribuyen a aumentar el riesgo de ILQ en estos pacientes. Los microorganismos implicados son aquellos que se encuentran en el propio intestino grueso (gram-negativos aerobios y anaerobios), siendo la proporción de anaerobios mucho mayor que en otros tramos del tubo digestivo151,344.

La profilaxis antibiótica electiva disminuye significativamente la tasa de ILQ en cirugía colorrectal21, recomendándose pautas que incluyan la cobertura de anaerobios. Sin embargo, hay una gran heterogeneicidad en los estudios y no es posible hallar evidencia clara para duración, momento de la administración, influencia de la vía de abordaje o características del paciente, dosis, frecuencia o posibilidad de efectos secundarios31,275,345,346.

El gran número de pautas profilácticas empleadas, así como la escasez de estudios comparativos de calidad hacen difícil realizar una recomendación firme. La elección del antibiótico se ha realizado buscando cobertura de gram-negativos y anaerobios, y se han utilizado diversas combinaciones de metronidazol con cefalosporinas de 2ª y 3ª generación347–351. La aparición de ertapenem generó una serie de EC no carentes de conflictos de intereses, en los que mostró superioridad a todas las combinaciones anteriormente propuestas352,353. Sin embargo, el incremento de las infecciones por *C. difficile* y el riesgo de emplear un agente potencialmente útil en infecciones por microorganismos multirresistentes, hacen cuestionable la aplicabilidad de los resultados de estos estudios.

En general, la mayoría de estudios recientes justifican el uso de monodosis o no prolongar la administración más allá de 24 h21,60. Un estudio caso-control354 y una revisión sistemática de la literatura5 no encuentran diferencias en la administración de una dosis de antibiótico a dosis múltiple, independientemente que se utilice profilaxis oral. Asimismo, en caso de cirugía prolongada (el límite clásico de 3h se basa en estudios de los años 80)60 o pérdidas hemáticas notables, debe repetirse la dosis. Estudios farmacocinéticos recomiendan repetir la dosis intraoperatoria en caso de cirugías prolongadas o un elevado aclaramiento de creatinina52,53.

***Recomendaciones de profilaxis***

***Indicación:*** *Recomendada en cirugía colorrectal (A-I)*

***Antibiótico:*** *cefuroxima más metronidazol o amoxicilina-ácido clavulánico (A-II)* *(añadir gentamicina en caso de alta prevalencia de BGN resistentes) (B-III)*

***Alérgicos:*** *metronidazol más gentamicina (B-III)*

***Duración:*** *una dosis preoperatoria (A-I)*

**Profilaxis antibiótica oral y preparación mecánica del colon.**

*Términos de búsqueda: “Antibiotic prophylaxis” AND “Colorectal surgery” AND “Preoperative oral antibiotic prophylaxis”.*

La preparación mecánica de colon (PMC) aislada no es una medida eficaz para disminuir la tasa de infección o de dehiscencia de sutura. Por el contrario, los datos generados por los estudios aleatorizados, los metanálisis que los agrupan y estudios observacionales sugieren que los antibióticos orales combinados con PMC juegan un papel crucial en la reducción del riesgo de ILQ superficial, profunda y de órgano espacio, de dehiscencia de sutura, íleo postoperatorio, reingresos y mortalidad, sin asociarse a un riesgo aumentado de infección por *C. difficile*355–358.

La profilaxis oral se basaba en la administración de antibióticos no absorbibles, como eritromicina base, que en algunos casos se han dejado de comercializar. En la actualidad, algunas de las combinaciones utilizadas incluyen antibióticos absorbibles como metronidazol o ciprofloxacino359. Las combinaciones orales más utilizadas son neomicina o kanamicina más metronidazol o eritromicina base360,361.

El papel del antibiótico oral en ausencia de PMC ha sido solo analizado en el marco de estudios observacionales362. Los resultados de los estudios prospectivos aleatorizados en curso de realización, que analizan el efecto de los antibióticos orales sin preparación mecánica, pueden arrojar valiosa información al respecto363.

Dado que la evidencia actual proviene de estudios que combinan antibióticos orales con PMC, por el momento, parece difícilmente justificable la práctica de cirugía colorrectal electiva sin una adecuada PMC que incluya la profilaxis antibiótica por vía oral. La profilaxis oral debe administrarse en un intervalo suficiente después de la preparación mecánica, repartida en tres dosis ingeridas 19, 18 y 9 horas antes del inicio del procedimiento quirúrgico.

***Recomendaciones de profilaxis***

- 1. ***Indicación:*** *Recomendada la preparación mecánica del colon (A-II) asociada a antibióticos orales (A-I) en cirugía colorrectal electiva*

***Antibiótico:****neomicina 1000 mg más metronidazol 500 mg en 3 dosis preoperatorias 19, 18 y 9 horas antes del inicio del procedimiento quirúrgico (A-II)*

- 1. **Cirugía hepato-bilio-pancreática**

*Términos de búsqueda: “Antibiotic prophylaxis” AND “Cholecystectomy” OR “Hepatopancreatobiliary surgery” OR “Hepatectomy” OR “Liver or hepatic resection” OR “Biliary tract surgery or reconstruction” OR “Pancreaticoduodenectomy” OR “Pancreatectomy”.*

La cirugía del tracto biliar engloba la colecistectomía, la exploración del conducto biliar y la colédoco-enterotomía. Los organismos más frecuentes después de cirugía del tracto biliar son *E. coli* y algunas especies de *Klebsiella* y enterococo; con menor frecuencia de estreptococo y estafilococo; y en ocasiones anaerobios, principalmente *Clostridium* spp.364–371. En laparoscopia, la reducción del tamaño de la herida quirúrgica se asocia a un descenso en la tasa de ILQ372,373, por lo que se podría administrar profilaxis solo en casos de alto riesgo369,371,374–379. Se considera alto riesgo: intervención de emergencia por enfermedad aguda364,365,380–385, inmunodepresión386, diabetes380,381,383,384, embarazo364,384, intervención >120 minutos365,387, edad >70 años388, colecistectomía abierta385,389 conversión de laparoscopia a abordaje abierto382,383, clasificación ASA ≥3365,380–383,385,388,389, episodio de cólico biliar dentro de los 30 días previos al procedimiento, ictericia, coledocolitiasis, colangitis, cirugía biliar previa, colecistitis aguda en los últimos 6 meses, pancreatitis litiásica y prótesis en vía biliar365,380–386,388 y antibioterapia en el último mes.

- - 1. **Colecistectomía y cirugía biliar**

En la colecistectomía laparoscópica en pacientes de bajo riesgo la profilaxis no parece necesaria, pero debería considerarse en todas las situaciones de alto riesgo390. Varios ensayos comparan una sola dosis en la inducción anestésica387,388,391 frente a 2, 3 o hasta 6 en diferentes momentos tras la intervención365,374,378,392,393, no encontrando diferencias en ninguno, salvo en Matsui Y et al380 que observaron menos complicaciones infecciosas y costes postoperatorios en la profilaxis de 3 dosis (24 h). Un ensayo394 comparó la forma de administración (oral versus intravenosa) no hallando diferencias en las tasas de infección. Yan RC384 en su metaanálisis de 12 ensayos clínicos tampoco encontró diferencias en la incidencia de ILQ. Las cefalosporinas de 1ª generación366,368,393,395, 2ª generación369,374,375,393,395,396 , y 3ª generación364 han sido los antimicrobianos más estudiados como agentes profilácticos, sin diferencias significativas entre ellas. La mayoría de los ensayos clínicos están realizados con un número pequeño de pacientes397,398, aunque recientemente se ha publicado uno que incluye 570 pacientes, sin encontrar beneficio de la profilaxis395. Un metaanálisis reciente de metaanálisis previos excluyendo ECC que no cumplen criterios encuentra datos a favor de la profilaxis, pero sólo uno de los ECC incluidos, no ciego y con alto riesgo de sesgos, mostró beneficio de la profilaxis399.

En resumen, la evidencia actual no apoya la profilaxis para los pacientes de bajo riesgo sometidos a colecistectomía laparoscópica electiva, incluso con ruptura incidental de la vesícula biliar (nivel A en contra de la profilaxis para los pacientes de bajo riesgo). La profilaxis antimicrobiana debe ser considerada para pacientes con alto riesgo de infección, incluyendo el abordaje abierto o de alto riesgo de conversión a procedimiento abierto (nivel A para la profilaxis en pacientes de alto riesgo).

***Recomendaciones de profilaxis***

***Indicación:***

- *No recomendada en colecistectomía laparoscópica electiva de riesgo bajo-moderado (D-I)*
- *Recomendada en colecistectomía abierta (A-I) o laparoscópica de alto riesgo (A-II)*

***Antibiótico:*** *cefazolina (A-I)*

***Alérgicos:****vancomicina más gentamicina o clindamicina más gentamicina (B-III)*

***Duración:*** *una dosis preoperatoria (A-I)*

- - 1. **Cirugía hepática**

La cirugía hepática se ha definido como limpia-contaminada, debido a la transección de conductos biliares. En general, en centros de referencia la mortalidad es inferior al 5% pero la tasa de infección puede llegar al 20-25%400.

Diferentes ensayos clínicos no han encontrado beneficio en la administración la profilaxis quirúrgica antibiótica. Wu et al.401 en su estudio de 1998 utilizaron cefazolina junto con gentamicina durante 7 días, no encontrando diferencias en la tasa de infección postoperatoria comparado con el grupo placebo, aunque excluyó a los pacientes con metástasis sincrónicas y a aquellos que precisaban de una hepatectomía urgente. Hirokawa en una publicación de 2013 llegó a la misma conclusión comparando con pautas de 3 días402, y Zhou et al403 tampoco hallaron diferencias comparando placebo con dosis preoperatoria de cefuroxima en la hepatectomía programada. Sin embargo, la mayoría de ellos incluyen pacientes con hepatectomía simple (1-3 segmentos hepáticos) y no hepatectomía mayor que incluye la resección de los conductos biliares extrahepáticos, a veces con colangioyeyunostomía, que se asocia a mayor riesgo de infección.

Se han descrito diferentes factores de riesgo asociados a infección en pacientes hepatectomizados400,403–411: edad >70 años, tiempo de intervención >300 minutos, transfusión sanguínea400,411, grado de extensión de la hepatectomía, presencia o no de drenaje biliar previo, ictericia preoperatoria y cirrosis. En cirugía hepática laparoscópica y robótica la incidencia de ILQ órgano-espacio es similar a la cirugía abierta, pero la incidencia de ILQ superficial y profunda es menor412 .

Respecto a la duración de la profilaxis, un estudio prospectivo, randomizado y ciego400 de tres años de duración reclutando 180 pacientes no encontró diferencias en la profilaxis de 2 vs 5 días, tampoco Sugawara et al413 cuando compara 2 con 4 días de profilaxis.

A pesar de la ausencia de evidencia del uso de profilaxis antibiótica en cirugía hepática, se continúa utilizando en la práctica clínica y en las guías se recomienda por inferencia de la cirugía biliar331. Los antibióticos utilizados en la mayoría de los estudios son cefalosporinas de 1ª o 2ª generación, o ampicilina-sulbactam. Sugawara *et al*413 en su ensayo clínico sobre pacientes con hepatectomía con resección extrahepática del conducto biliar (excluyendo hepatopancreatoduodenectomía) utilizaron la profilaxis antibiótica basada en los cultivos de drenaje biliar previo. Cuando los cultivos fueron negativos, utilizaron preferentemente cefalosporinas de 1ª o 2ª, y cuando fueron positivos, se ajustaron a la microbiología (70% fueron cocos grampositivos, de los que el 60% fueron enterococos). Estos mismos autores, en una revisión retrospectiva de 565 pacientes con hepatectomía con resección extrahepática del conducto biliar en los que se realizó previamente drenaje biliar encuentran que aquellos pacientes con cultivos positivos del drenaje biliar habían tenido de forma significativa más episodios de colangitis o bacteriemias414. La profilaxis se realizó de acuerdo a los cultivos previos como en el ensayo anterior, con una duración según criterio del cirujano. No hubo diferencias significativas en el porcentaje de complicaciones infecciosas. De nuevo los microorganismos aislados con más frecuencia en el drenaje biliar fueron *Enterococcus* spp, seguido de *Klebsiella* spp, *Staphylococcus* spp, y *Enterobacter* spp, que fueron también los más frecuentes aislados en los pacientes con infección414. El único factor de riesgo independiente asociado con tener una infección por un microorganismo multirresistente fue el tener un aislamiento previo en drenaje biliar por ese microorganismo multirresistente414.

En resumen, no existe evidencia para la utilización de profilaxis antibiótica en la hepatectomía simple. En la hepatectomía mayor, con resección del conducto biliar extrahepático, estaría recomendada la profilaxis. No existen estudios específicos en este tipo de cirugía que comparen una dosis única preoperatoria con otras duraciones, por lo que las recomendaciones habría que realizarlas por inferencia de otras cirugías. La incidencia de ILQ en esta cirugía no ha descendido, aunque se utilice una duración prolongada de la profilaxis. La duración recomendada es una dosis preoperatoria. En este tipo de cirugía prolongada es importante la repetición de dosis cada 3 horas (dependiendo de la vida media del antibiótico utilizado). En caso de cultivos de drenaje biliar negativos o en ausencia de factores de riesgo, se recomienda una cefalosporina de 1ª o 2ª generación, o amoxicilina-ácido clavulánico si existen factores de riesgo dada la elevada tasa de aislamientos de enterococo. En caso de cultivos previos se debe ajustar la profilaxis a los mismos.

***Recomendaciones de profilaxis***

***Indicación:***

- *No recomendada en hepatectomía simple (D-I)*
- *Recomendada en hepatectomía mayor (incluye resección biliar extrahepática) (A-II)*

***Antibiótico:****cefazolina (A-I) o amoxicilina-ácido clavulánico (A-III)*

*Si cultivos previos: ajustar según sensibilidad (A-II)*

***Alérgicos:*** *vancomicina más aminoglucósido (A-III)*

***Duración:****≤ 24 h (A-I), posiblemente una dosis única sea suficiente (A-II)*

- - 1. **Cirugía pancreática**

El tiempo medio quirúrgico de la duodenopancreatectomía es de 5,5 horas con una pérdida sanguínea media de 350ml415. La incidencia de ILQ es del 20-30%416. Los agentes etiológicos predominantes son enterococos, además de estafilococos, estreptococos y bacilos gramnegativos. Los factores de riesgo asociados a ILQ son ASA ≥3, drenaje biliar preoperatorio, cirugía prolongada, otras cirugías concomitantes, y sangrado importante417.

La profilaxis en cirugía duodenopancreática está indicada, por inferencia de la cirugía biliar, pues no hay estudios comparados con placebo. En cirugía limpia (cirugía distal de páncreas) se recomienda cefazolina, en el resto se han utilizado cefalosporinas de 2ª o 3ª generación o amoxicilina-ácido clavulánico151,416,418,419. Cuando existen cultivos previos de la bilis se puede ajustar la antibioterapia al patrón de sensibilidad de los microorganismos aislados413,420,421.

Es necesario redosificar el antibiótico cuando la cirugía se prolonga o existen grandes pérdidas sanguíneas. No hay evidencia que soporte que pautas de 48 horas son mejores que las pautas de menos de 24 horas.

***Recomendaciones de profilaxis***

***Indicación******:*** *Recomendada en cirugía pancreática (A-II)*

***Antibiótico:***

- *Bajo riesgo (no manipulación de vía biliar): cefazolina (A-I) o amoxicicilina-ácido clavulánico (A-III). Añadir gentamicina en caso de alta prevalencia de BGN resistentes (B-III).*
- *Alto riesgo con información microbiológica de la bilis: ajustar a la microbiología previa (A-II).*
- *Alto riesgo sin información microbiológica de la bilis: amoxicilina-ácido clavulánico más gentamicina (B-III).*

***Alérgicos:*** *vancomicina más gentamicina (B-III).*

***Duración:*** *≤ 24 h (A-I), posiblemente una dosis preoperatoria sea suficiente (A-II)*

- 1. **Cirugía peritoneal avanzada-Peritonectomía**

*Términos de búsqueda: “Antibiotic prophylaxis” AND “Peritoneal cytoreductive surgery” OR “Peritonectomy”.*

Los procedimientos quirúrgicos que se realizan en el abordaje radical de la carcinomatosis peritoneal dependen de la neoplasia primaria y de la extensión tumoral. Dichos procedimientos pueden incluir esplenectomía, pancreatectomía, colecistectomía, apendicectomía, linfadenectomías y resecciones viscerales gastrointestinales o colorrectales. Habitualmente se asocia la quimioterapia intraperitoneal intraoperatoria hipertérmica (HIPEC) y, en ocasiones, la quimioterapia intraperitoneal postoperatoria precoz (EPIC) a través de un catéter colocado en la cavidad abdominal422 .

Ante tal escenario, son numerosos los factores de riesgo asociados a la ILQ. Aparte de los relacionados con el paciente (edad, comorbilidad, inmunosupresión, neoplasia, desnutrición), los relacionados con la intervención quirúrgica y factores exógenos (duración, trauma quirúrgico, electrofulguración masiva, catéteres intraabdominales, drenajes abdomen-tórax, quimioterapia intraperitoneal, fluidoterapia elevada, transfusión sanguínea, estancia hospitalaria)422 .

Entre los microorganismos más frecuentemente aislados se encuentran enterobacterias, con predominio de *Escherichia coli*, *Enterococcus* spp., *Staphylococcus* spp., *Streptococcus* spp., *Bacteroides* spp., *Clostridium* spp., y en ocasiones *Candida* spp.422–424.

No existen estudios prospectivos, pero parece indicado administrar un antibiótico con capacidad anaerobicida, por lo que amoxicilina-ácido clavulánico podría ser mejor elección que cefazolina de forma aislada, salvo que se le añadiese metronidazol.

***Recomendaciones de profilaxis***

***Indicación:*** *Recomendada en cirugía oncológica peritoneal avanzada (A-II)*

***Antibiótico:*** *cefazolina más metronidazol o amoxicilina-ácido clavulánico (A-III). Añadir gentamicina si riesgo de infección por BGN resistentes (B-III)*

***Alérgicos:*** *metronidazol más gentamicina (B-III)*

***Duración:*** *una dosis preoperatoria (A-II)*

- 1. **Cirugía urológica**

La cirugía urológica, abierta o laparoscópica, está clasificada como limpia-contaminada10 y es tributaria de profilaxis antibiótica9. La cistoscopia simple y la litotricia extracorpórea son procedimientos invasivos no tributarios de profilaxis, salvo que exista algún factor de riesgo específico. La recomendación de profilaxis en procedimientos urológicos abiertos o laparoscópicos como la nefrectomía, se basa en las recomendaciones generales de profilaxis según el grado de contaminación.

Además del grado de contaminación de la herida, se han descrito como factores de riesgo de infección quirúrgica y de infección del tracto urinario (ITU) tras la cirugía y los procedimientos urológicos, las anomalías anatómicas de la vía urinaria, la obstrucción urinaria, la litiasis urinaria, el sondaje uretral o los catéteres externos58. La ITU preoperatoria es uno de los principales factores de riesgo de infección postquirúrgica. Otros factores descritos son la duración de la cateterización, los sistemas de lavado abiertos sobre los cerradas y la piuria postoperatoria58. La American Urologic Association (AUA)425, considera que determinadas condiciones del huésped (Tabla 7) pueden alterar la respuesta frente a las infecciones y por tanto ser tributarios de profilaxis antibiótica algunos procedimientos en los que no está habitualmente aconsejada.

Los microorganismos más frecuentemente implicados en las infecciones urinarias son los bacilos gramnegativos, fundamentalmente *E. coli*, pero también los enterococos. En aquellos procedimientos en los que se hace incisión sobre la piel, implique o no la vía urinaria, también pueden producirse infecciones por *S. aureus*, estafilococos coagulasa-negativa, y especies de estreptococos, y si hay implantación protésica, *S. epidermidis* y *P. aeruginosa*9.

Se han utilizado diferentes regímenes antibióticos en la profilaxis urológica sin encontarse ninguna superior: cefalosporinas, aminoglucósidos, cotrimoxazol, nitrofurantoína, fluorquinolonas y piperacilina-tazobactam, y aunque las fluorquinolonas se han mostrado superiores en algunos estudios, con la ventaja de poder administrase vía oral, la emergencia de resistencias la hacen desaconsejable en la actualidad. Las cefalosporinas de 3ª generación y las carbapenemas no han demostrado ser más efectivas que las cefalosporinas de 1ª y 2ª generación, aminoglucósidos, y antibióticos orales como cotrimoxazol, nitrofurantoína y fluorquinolonas, y no se aconsejan por la potencial aparición de resistencias9.

Tabla 7. Factores que alteran la respuesta del huésped frente a las infecciones asociadas a la cirugía urológica.

- - Edad avanzada,
- - Anomalías anatómicas del tracto urinario,
- - Situación nutricional deficiente
- - Tabaquismo
- - Uso crónico de corticosteroides
- - Inmunodeficiencias
- - Catéteres externos
- - Material endógeno o exógeno colonizado
- - Infección distante
- - Hospitalización prolongada
  - 1. **Cistoscopia simple (sin manipulación)**

*Términos de búsqueda: “Antimicrobial prophylaxis” AND “Urethrocystoscopy” OR “Urodynamic study” OR “Urethrocystography”.*

La utilización de antibióticos profilácticos en la cistoscopia flexible es un tema muy debatido. Los estudios aleatorizados y metaanálisis muestran tendencia a reducción de la bacteriuria post-procedimiento con la profilaxis antibiótica426–428. Sin embargo, el número de tratamientos necesarios para obtener un beneficio es elevado428. Algunas guías de práctica clínica (Canadian Urological Association)429 recomiendan la profilaxis antibiótica en pacientes de riesgo (Tabla 7).

Otros estudios prospectivos430–433 y ECC434–438 no han demostrado beneficios en la profilaxis antibiótica en estos procedimientos.

En los estudios mencionados se han utilizado diferentes antimicrobianos, pero no existen estudios comparativos. Cuando sea necesaria la administración de profilaxis antibiótica, la elevada tasa de resistencias de *E. coli* en nuestro entorno desaconseja el uso de fluroquinolonas y trimetoprim-sulfametoxazol. Podría utilizarse cefalosporinas de 2ª generación, amoxicilina-ácido clavulánico o fosfomicina-trometamol, en dosis única preoperatoria. Si se utiliza fosfomicina, debe administrarse al menos 3 horas antes de la intervención.

No existe evidencia para la profilaxis en estudios urodinámicos, pero por inferencia de la citoscopia, no estaría recomendada.

***Recomendaciones de profilaxis***

***Indicación:***

- *No recomendada en la cistoscopia simple o urodinamia sin factores de riesgo (D-I).*
- *Recomendada si existen factores de riesgo (B-III)*

***Antibiótico:****fosfomicina trometamol o cefuroxima o amoxicilina-ácido clavulánico (A-II)*

***Alérgicos:****Fosfomicina trometamol (A-II)*

***Duración:*** *una dosis preoperatoria (A-I)*

- - 1. **Resección transuretral de próstata.**

*Términos de búsqueda: “Antimicrobial prophylaxis” AND “Transurethral prostatic resection”.*

La resección transuretral de próstata está clasificada como cirugía limpia contaminada. Los estudios aleatorizados aconsejan la administración de profilaxis antibiótica en todos los pacientes sometidos a este procedimiento439–442. La mayoría de los estudios están realizados con quinolonas y cotrimoxazol, pero hoy día se desaconsejan por el alto porcentaje de resistencias. En una revisión reciente de 9 estudios en los que se realizaba la profilaxis antibiótica con fosfomicina trometamol (3 g antes y 24 horas después), en 8 se mostró beneficio en la prevención de infección urinaria443. Una revisión sistemática de la literatura comparando profilaxis combinada vs 1 sólo antibiótico (8 estudios) encuentran menos infecciones con la profilaxis combinada, pero en todas las pautas utilizaron ciprofloxacino que combinaron mayoritariamente con un aminoglucósido444.

***Recomendaciones de profilaxis***

***Indicación:*** *Recomendada en* *resección transuretral de próstata (A-I)*

***Antibiótico:*** *fosfomicina-trometamol (A-II) o cefuroxima o amoxicilina-ácido clavulánico (A-III).*

***Alérgicos:****fosfomicina-trometamol (A-II) o gentamicina (A-III)*

***Duración:*** *una dosis preoperatoria (A-I)*

- - 1. **Resección transuretral de tumor vesical.**

*Términos de búsqueda: “Antimicrobial prophylaxis” AND “Transurethral resection of bladder tumor”.*

No existen datos concluyentes respecto a la utilidad de la profilaxis en la resección transuretral de tumor vesical445–447. Algunas guías sugieren la administración de profilaxis antibiótica si existen factores de riesgo (tabla 7) o en tumores de gran tamaño9,429.

***Recomendaciones de profilaxis***

***Indicación:***

- *No recomendada en* *resección transuretral de tumor vesical (D-III)*
- *Recomendada en* *resección transuretral de tumor vesical si factores de riesgo o tumores de gran tamaño (B-III)*

***Antibiótico:*** *fosfomicina trometamol (A-II) o cefuroxima o amoxicilina-ácido clavulánico (A-III).*

***Alérgicos:*** *Fosfomicina trometamol (A-II) o gentamicina (A-III)*

***Duración:*** *una dosis preoperatoria (A-I)*

- - 1. **Inserción/retirada de stent ureteral. Cirugía endourológica ambulatoria.**

*Términos de búsqueda: “Antimicrobial prophylaxis” AND “Cystoscopic stent removal” OR “Outpatient endourologic surgery”.*

No existen estudios concluyentes a favor de la utilización rutinaria de profilaxis448,449.La administración de profilaxis está indicada en pacientes con factores de riesgo (Tabla 7).

***Recomendaciones de profilaxis***

***Indicación:*** *Recomendada en inserción/retirada de stent ureteral y cirugía endourológica ambulatoria en pacientes con factores de riesgo (B-III)*

***Antibiótico:*** *fosfomicina trometamol (A-II) o cefuroxima o amoxicilina-ácido clavulánico (A-III)*

*En pacientes con infección previa o colonización de catéteres es preciso adaptar la profilaxis antibiótica en base a urocultivos previos (B-II)*

***Alérgicos:*** *fosfomicina trometamol (A-II) o gentamicina (A-III)*

***Duración:*** *una dosis preoperatoria (A-I)*

- - 1. **Ureteroscopia con extracción de cálculos**

*Términos de búsqueda: “Antimicrobial prophylaxis” AND “Ureteroscopic stone removal” OR “Endoscopic extraction of upper urinary tract stones”.*

Los estudios disponibles no son concluyentes450–453. Dos metaanálisis recientes concluyeron que el antibiótico preoperatorio no disminuye el riesgo de ITU, pero reduce la incidencia de piuria y bacteriuria454,455. No se pudo evaluar la eficacia de diferentes regimens de antibióticos. Una sóla dosis parece suficiente454,456.

Algunas guías sugieren que la administración de profilaxis en la ureteroscopia con extracción de cálculos se limite a la litiasis ureteral no complicada en pacientes con factores de riesgo (Tabla 7) o en pacientes con litiasis ureteral complicada o impactada429,457. Otras guías recomiendan que se administre profilaxis a todos los pacientes con manipulación de la vía urinaria y extracción de cálculos116.

***Recomendaciones de profilaxis***

***Indicación:*** *Recomendada en* *ureteroscopia con extracción de cálculos (C-III), fundamentalmente en pacientes con factores de riesgo (B-III).*

***Antibiótico:*** *fosfomicina trometamol (A-II), cefuroxima o amoxicilina-ácido clavulánico (A-III)*

*En pacientes con infección previa o colonización de catéteres es preciso adaptar la profilaxis antibiótica en base a urocultivos previos (B-II)*

***Alérgicos:*** *fosfomicina trometamol (A-II) o gentamicina (A-III)*

***Duración:*** *una dosis preoperatoria (A-I)*

- - 1. **Litotricia extracorpórea**

*Términos de búsqueda: “Antimicrobial prophylaxis” AND “Extracorporeal shock wave lithotripsy”.*

ECC458,459, estudios prospectivos460 y metaanálisis461 han demostrado que en presencia de orina estéril no es necesaria la profilaxis antibiótica para prevenir infecciones tras la litotricia extracorpórea. La administración de profilaxis antibiótica podría estar indicada exclusivamente en pacientes con factores de riesgo (Tabla7).

***Recomendaciones de profilaxis***

***Indicación:***

- *No recomendada en la litotricia extracorpórea sin factores de riesgo (D-I)*
- *Recomendada en la litotricia extracorpórea con factores de riesgo (B-III)*

***Antibiótico:*** *fosfomicina trometamol (A-II), cefuroxima o amoxicilina-ácido clavulánico (A-III)*

*En pacientes con infección previa o colonización de catéteres es preciso adaptar la profilaxis antibiótica en base a urocultivos previos (B-II)*

***Alérgicos:*** *fosfomicina trometamol (A-II) o gentamicina (A-III)*

***Duración:*** *una dosis preoperatoria (A-I)*

- - 1. **Nefrectomía abierta o laparoscópica**.

*Términos de búsqueda: “Antimicrobial prophylaxis” AND* *“Transperitoneal nephrectomy” OR “Laparoscopic nephrectomy”.*

La nefrectomía transabdominal abierta o laparoscópica se clasifica como cirugía limpia, aunque dependiendo de la causa de la cirugía puede tratarse de una limpia-contaminada. Esto se aplica a los pacientes sometidos a biopsia renal o colocación de drenaje percutáneo. No existen estudios aleatorizados de calidad462,463, la mayoría son estudios de cohortes464–467. Con la evidencia disponible no está indicada la profilaxis, excepto en pacientes de alto riesgo.

***Recomendaciones de profilaxis***

***Indicación:*** *No recomendada en* *nefrectomía abierta o laparoscópica (D-II), excepto si se considera* *cirugía limpia contaminada o pacientes de alto riesgo (B-II).*

***Antibiótico:*** *cefuroxima o amoxicilina-ácido clavulánico (A-III)*

*En pacientes con infección previa o colonización de catéteres es preciso adaptar la profilaxis antibiótica en base a urocultivos previos (B-II)*

***Alérgicos:*** *gentamicina (A-III)*

***Duración:*** *una dosis preoperatoria (A-I)*

- - 1. **Nefrolitotomía percutánea**

*Términos de búsqueda: “Antimicrobial prophylaxis” AND* *“Percutaneous nephrolithotomy” OR “Percutaneous surgical interventions in patients with urolithiasis”.*

La nefrolitotomía percutánea con orina estéril es un procedimiento de cirugía limpia-contaminada y tributario de profilaxis antibiótica. El microorganismo más frecuente es *E. coli*. La administración de antibióticos profilácticos en pacientes con urocultivo previo negativo disminuye de forma significativa la frecuencia de complicaciones468–472. Una única dosis en la inducción anestésica es suficiente469,473,474. Ninguna pauta se ha demostrado mejor que otra473,475; el tipo de antibiótico ha de adaptarse al patrón de sensibilidad local.

***Recomendaciones de profilaxis***

***Indicación:*** *Recomendada en* *nefrolitotomía percutánea (A-II)*

***Antibiótico:*** *cefuroxima o amoxicilina-ácido clavulánico (A-II)*

*En pacientes con antecedentes de ITU por BGN productores de BLEE es preciso adaptar la profilaxis antibiótica (A-III)*

***Alérgicos:*** *gentamicina (A-III)*

***Duración:*** *una dosis preoperatoria (A-I)*

- - 1. **Prostatectomía simple (vía abdominal y laparoscópica)**

*Términos de búsqueda: “Antimicrobial prophylaxis” AND “Laparoscopic radical prostatectomy” OR “Radical retropubic prostatectomy”.*

La prostatectomía por vía abdominal o laparoscópica es de una cirugía limpia-contaminada sin penetrar en el tracto digestivo. La profilaxis antibiótica disminuye la incidencia de bacteriuria y sepsis urológica en la prostactectomía abdominal y laparoscópica476. Una dosis de antibiótico preoperatoria previene la infección476–480. El tipo de antibiótico ha de adaptarse al patrón de sensibilidad local y programas de optimización de antimicrobianos del centro.

***Recomendaciones de profilaxis***

***Indicación:*** *Recomendada en* *prostatectomía simple (abdominal y laparoscópica) (A-II)*

***Antibiótico:*** *cefuroxima o amoxicilina-ácido clavulánico (A-III)*

***Alérgicos:*** *gentamicina más vancomicina (B-III)*

***Duración:*** *una dosis preoperatoria (A-I)*

- - 1. **Cistectomía radical con entrada en el tracto intestinal. Derivaciones urinarias.**

*Términos de búsqueda: “Antimicrobial prophylaxis” AND “Radical cystectomy”.*

No existen estudios aleatorizados en relación con la utilización de profilaxis en cirugía de cistectomía con derivación urinaria y construcción de neo-vejigas con resección intestinal. Este procedimiento quirúrgico se considera cirugía limpia-contaminada con resección intestinal, con alta tasa de infección postquirúrgica. Los estudios observacionales y los realizados en el entorno de la cirugía colorrectal confirman el beneficio de la administración de antibióticos con cobertura de aerobios/anaerobios481–483. Un estudio prospectivo aleatorizado demostró que una dosis única fue tan eficaz como la de 3 días484.

***Recomendaciones de profilaxis***

***Indicación:*** *Recomendada en la cistectomía radical con entrada en tracto intestinal y derivaciones urinarias (A-II)*

***Antibiótico:*** *cefuroxima más metronidazol o amoxicilina-ácido clavulánico (A-II) (añadir gentamicina en caso de alta prevalencia de BGN resistentes) (B-III)*

***Alérgicos:*** *gentamicina más metronidazol (B-III)*

***Duración:*** *una dosis preoperatoria (A-II)*

- - 1. **Biopsia transrectal de próstata**

*Términos de búsqueda: “Antimicrobial prophylaxis” AND “Prostate Biopsy” OR “Transrectal prostate biopsy”.*

Dos metaanálisis de estudios aleatorizados han demostrado el beneficio de la profilaxis antibiótica frente a placebo en la prevención de las complicaciones infecciosas tras la biopsia transrectal de próstata442,485. Aunque inicialmente se utilizaron profilaxis de un día o más442,486, estudios recientes han demostrado que una dosis preoperatoria es igual de efectiva que una profilaxis antibiótica más prolongada485,487 y que la administración oral es tan efectiva como la intravenosa e intramuscular. Se han comparado diferentes clases de antibióticos (fluoroquinolonas, cotrimoxazol, cefalosporinas, amoxicilina-ácido clavulánico y piperacilina-tazobactam entre otros) sin encontrarse superioridad en ninguna485. La mayor evidencia existe con fluorquinolonas, y la mayoría de las guías recomiendan la administración de profilaxis con fluoroquinolonas o cotrimoxazol. Debido a la emergencia de resistencias a estos antimicrobianos, no se recomiendan como profilaxis en nuestro entorno. Fosfomicina trometamol administrada 1-4 horas antes de la biopsia alcanza concentraciones en suero y sangre suficiente para cubrir más del 90% de los microrganismos con CMI ≤4 mg/L488. Una revisión sistemática de 5 estudios en los que se compara fosfomicina trometamol oral con ciprofloxacino en la profilaxis de la biopsia transrectal encuentra una menor incidencia de ITU y menor tasa de resistencias en el grupo de fosfomicina489. De hecho, un metaanálisis reciente de 15 estudios (8 retrospectivos y 7 prospectivos) con 12.320 pacientes demostró que la profilaxis dirigida según el resultado del cultivo de un frotis rectal para descartar resistencia a fluorquinolonas versus la profilaxis empírica redujo significativamente las complicaciones infecciosas (3,4% vs 0,8%, NNT de 39 en el grupo de profilaxis dirigida)490. Por tanto, en nuestro medio es preferible utilizar una dosis única de fosfomicina trometamol o una dosis de cefalosporina de 2ª generación oral o amoxicilina-ácido clavulánico. Debe ajustarse la profilaxis a la epidemiología local. Debido a la alta tasa de resistencias sería recomendable la profilaxis dirigida según resultados de frotis rectal previo.

***Recomendaciones de profilaxis***

***Indicación******:*** *Recomendada en la biopsia transrectal de próstata (A-I)*

***Antibiótico:****fosfomicina trometamol (A-I) o cefuroxima oral antes del procedimiento o amoxicilina-ácido clavulánico (A-II) (añadir gentamicina si alta prevalencia de BGN resistentes (B-III)*

*Si antecedentes de ITU por microorganismos multiresistentes es recomendable la profilaxis dirigida (A-II).*

***Alérgicos:****fosfomicina trometamol (A-I) o gentamicina (A-III)*

***Duración:****una dosis preoperatoria 1-3 horas antes del procedimiento (A-I)*

- - 1. **Cirugía limpia: testicular, fimosis y otras cirugías de pene sin implantación de prótesis, biopsia renal abierta.**

*Términos de búsqueda: “Antimicrobial prophylaxis” AND “Scrotal surgery” OR “Vasectomy” OR “Varicocele surgery” OR “Phimosis”.*

En los procedimientos clasificados como cirugía limpia, como en los anteriormente reseñados, la profilaxis antibiótica no reduce la tasa de infecciones 58,457,491.

***Recomendaciones de profilaxis***

***Indicación:*** *No recomendada en cirugía limpia (testicular, fimosis y otras cirugías de pene sin implantación de prótesis, biopsia renal abierta) (D-II)*

- - 1. **Prótesis de pene**

*Términos de búsqueda:* *“Antimicrobial prophylaxis” AND “Penile prosthesis implantation”.*

La evidencia de la profilaxis en este procedimiento quirúrgico se basa en la de la inserción de material protésico en otros procedimientos como la cirugía ortopédica151,457, no existen estudios aleatorizados ni comparativos. La duración de 24 horas o más corta parece la más adecuada492–495.

***Recomendaciones de profilaxis***

***Indicación:*** *Recomendada en la implantación de prótesis de pene (A-III)*

***Antibiótico******:*** *cefalosporina de 1ª o 2ª generación (A-III)*

***Alérgicos:****gentamicina más vancomicina (B-III)*

***Duración:*** *una dosis preoperatoria (A-I)*

- 1. **Cirugía ginecológica**
     1. **Cesárea**

*Términos de búsqueda:* *“Antimicrobial prophylaxis” AND “Cesarean delivery” OR “Cesarean section”.*

A pesar de que algunos ensayos clínicos aleatorizados y controlados con placebo han cuestionado la eficacia del uso de profilaxis antibiótica en las cesáreas de bajo riesgo496–498, su eficacia ha sido demostrada en múltiples estudios y metaanálisis499–503. Hay suficiente evidencia para recomendar una profilaxis antibiótica en cesárea urgente y electiva9,504,505.

La American College of Obstetricians and Gynecologists (ACOG) y la American Academy of Pediatrics (AAP) recomiendan el uso de cefalosporinas de 1ª generación, por su eficacia, su espectro de actividad y su bajo coste505 12. Esta recomendación se basa en un metaanálisis de 51 ensayos clínicos aleatorizados que comparaban al menos dos regímenes antibióticos, concluyendo que ampicilina y cefalosporinas de 1ª generación tenían una eficacia similar506. Ensayos clínicos aleatorizados más recientes han demostrado una reducción de la tasa de infecciones ampliando el espectro antibiótico, especialmente para *U. urealyticum* y *Mycoplasma,* al añadir metronidazol, azitromicina o doxiciclina a la profilaxis convencional507–511. Un ensayo clínico reciente realizado en cesárea no electiva509 mostró una reducción de ILQ, sobre todo en endometritis, cuando se añadió azitromicina a cefazolina antes de la incisión. El uso de azitromicina podría jugar un papel en las cesáreas urgentes, sobre todo en mujeres con colonización o infección subclínica por clamidias o micoplasmas. Se necesitan más estudios para poner en práctica esta estrategia.

El momento clásico de la administración de los antimicrobianos profilácticos en las cesáreas ha sido tras el clampaje del cordón506,512,513 para no modificar la flora del neonato y no enmascar una posible sepsis neonatal. Sin embargo, varios estudios y metaanálisis, y las guías de los CDC y OMS apoyan la administración de la profilaxis antes de la incisión1,2,512–514.

En cuanto a la duración de la profilaxis antibiótica, varios estudios han demostrado que una dosis única previa a la cirugía no resulta inferior a múltiples dosis posteriores en la prevención de las infecciones postoperatorias515–517.

***Recomendaciones de profilaxis***

***Indicación:*** *Recomendada en cesárea electiva y urgente* (A-I)

***Antibiótico:***

- *En cesárea electiva cefazolina (A-I)*
- *En cesárea no electiva: cefazolina más azitromicina (A-I)*

***Alérgicos:*** *clindamicina más gentamicina (B-III)*

***Duración:*** *una dosis preoperatoria antes de la incisión (A-I)*

- - 1. **Histerectomía**

*Términos de búsqueda:* *“Antimicrobial prophylaxis” AND “Hysterectomy”.*

La histerectomía, vaginal y abdominal, se considera una cirugía limpia-contaminada518 tributaria de profilaxis preoperatoria519–521. Varios metaanálisis han demostrado la eficacia de la administración de cefalosporinas de 1ª y 2ª generación, principalmente cefazolina y cefoxitina522–524. No existen estudios controlados con placebo para evaluar la eficacia de la profilaxis en la histerectomía laparoscópica.

El régimen más recomendado es una dosis única de cefazolina. Pautas alternativas a cefazolina podrían ser cefoxitina, cefuroxima o amoxicilina-ácido clavulánico525,526. Los estudios que compararon pautas con diferentes cefalosporinas demostraron que las de 1ª generación (principalmente cefazolina) eran equivalentes a las de 2ª y 3ª generación en histerectomía vaginal527–536. En histerectomía abdominal no se han objetivado diferencias en cuanto a tasa de ILQ comparando cefalosporinas de 2ª y 3ª generación533,536–540 y cefazolina no fue inferior a cefalosporinas de 2ª y 3ª generación528,541–543. Aun así, un ensayo clínico aleatorizado y doble ciego en 511 histerectomías vaginales, observó una mayor tasa de ILQ en las pacientes que recibieron cefazolina comparado con cefotetan544.

No existe evidencia de que un régimen de profilaxis más allá de una única dosis disminuya la tasa de infecciones de la herida quirúrgica, infecciones urinarias, episodios febriles o estancia hospitalaria545. Los estudios que comparan una única dosis de un antibiótico vs regímenes de múltiples dosis de otro antibiótico, muestran que ambos regímenes son efectivos en la reducción de la tasa de infección postoperatoria en histerectomía vaginal y abdominal536–541,546. Existen pocos estudios que incluyan una dosis única de cefazolina525,529,546,547 o amoxicilina—acido clavulánico525,547, pero estos indican que una única dosis de antibiótico sería suficiente como profilaxis en cirugía ginecológica.

***Recomendaciones de profilaxis***

***Indicación:*** *Recomendada en histerectomía abdominal y vaginal (A-I)*

***Antibiótico:****cefazolina o cefoxitina o amoxicilina-ácido clavulánico (A-I)*

***Alérgicos******:*** *clindamicina más gentamicina (B-III) o vancomicina más gentamicina (B-III)*

***Duración:*** *una dosis preoperatoria (A-I)*

- - 1. **Anexectomía y ligadura de trompas**

*Términos de búsqueda:* *“Antimicrobial prophylaxis” AND “Anexectomy” OR “Tubal ligation” OR “Tubal esterilization”.*

La anexectomía u ovariectomía sin histerectomía, es considerada una cirugía de clase I o limpia, con bajo riesgo de infección, que no precisa profilaxis antibiótica548,549. La esterilización tubárica o ligadura de trompas, por vía laparoscópica o minilaparotomía, es también una cirugía limpia que no precisa de profilaxis antibiótica548–550.

***Recomendaciones de profilaxis***

***Indicación:****No recomendada en anexectomía y ligadura de trompas (D-III)*

- - 1. **Aborto inducido o legrados puerperales**

*Términos de búsqueda: “Antimicrobial prophylaxis” AND “Abortion” OR “Uterine evacuation”.*

Las tasas de infección del tracto genital superior en el contexto del aborto legal inducido suelen ser inferiores al 1%, el riesgo es mayor en caso de infección por gonococo o chlamydia no tratadas551. Un metaanálisis de 17 ensayos clínicos apoyan el uso de antibióticos profilácticos para el aborto quirúrgico en el primer trimestre552. Para el aborto con medicamentos, la evidencia es menor; en base a 6 estudios prospectivos se ha estimado un riesgo de infección del 0,32%, y dado que la tendencia con los nuevos tratamientos orales es una menor incidencia, se ha estimado que el número de pacientes necesario tratar (NNT) para prevenir una infección en 5.000553.

Los antibióticos estudiados más efectivos han sido nitromidazol, betalactámicos y tetraciclinas cuando se han comparado con placebo (RR 0,54, IC 95% 0,37-0,77; RR 0,46, IC 95% 0,27-0,80; y RR 0,37, IC 95% 0,14-0,98, respectivamente). Una dosis única preoperatoria fue tan efectiva como pautas de varios días.

En un ensayo clínico se comparó la efectividad de la administración de profilaxis antibiótica universal (1 g de metronidazol rectal más doxiciclina cada 12 horas 1 semana) o según el resultado del screening para *Chlamydia*, gonococo y vaginosis bacteriana554; las que tuvieron un test positivo recibieron tratamiento según la infección diagnosticada (doxiciclina, ciprofloxacino y metronidazol, respectivamente) y se las envío a consultas para seguimiento de las parejas, y las negativas no recibieron tratamiento. Las infecciones genitales tras el aborto fueron más frecuentes en las tratadas con el test positivo (la mayoría no fueron a las consultas). Posiblemente la profilaxis no sea generalizable a toda la población, y sea más efectiva en la interrupción voluntaria del embarazo que en el aborto terapéutico.

Para el aborto en el segundo trimestre no existen estudios controlados, pero posiblemente sean eficaces las mismas pautas utilizadas en el aborto del primer trimestre.

En ausencia de nuevos estudios controlados, se recomienda la profilaxis en todos los procedimientos de aborto quirúrgico.

Doxiciclina en monodosis por via oral con el estómago vacío, es la pauta más estudiada y recomendada 521. Metronidazol se considera una opción alternativa 521, aunque la eficacia de la adición de metronidazol en mujeres con vaginosis no está del todo demostrada553. Azitromicina 1 g en dosis única también puede ser una alternativa razonable, asociada a metronidazol555.

***Recomendaciones de profilaxis***

***Indicación:***

- *Recomendada en el aborto quirúrgico inducido del primer trimestre (A-I) y del 2º trimestre o legrados puerperales (A-III)*
- *No recomendado en el aborto médico (D-III)*

***Antibiótico:****doxiciclina 100 mg via oral 2 horas antes o iv antes del procedimiento (A-I) o azitromicina 1 g vo o iv más metronidazol 500 mg vo (B-III)*

***Duración:*** *una dosis preoperatoria (A-II)*

- - 1. **Reparación de desgarros vaginales postparto (III/IV)**

*Términos de búsqueda: “Antimicrobial prophylaxis” AND “Perineal tears” OR “Postpartum”.*

A pesar de que solo existe un ensayo clínico en esta cirugía556, se recomienda administrar profilaxis antibiótica con una cefalosporina de segunda generación (cefoxitina) o amoxicilina-ácido clavulánico en los desgarros vaginales post-parto grados III y IV (los que afectan a ano o recto, respectivamente).

***Recomendaciones de profilaxis***

***Indicación:***

*Recomendada en la cirugía de desgarros vaginales postparto (III/IV) (A-I).*

***Antibiótico:****cefoxitina o amoxicilina-ácido clavulánico (A-I).*

***Alérgicos:****clindamicina más gentamicina (B-III)*

***Duración:*** *una dosis preoperatoria (A-I)*

- 1. **Trasplantes**
     1. **Riñón**

*Términos de búsqueda: “Antimicrobial prophylaxis” AND “Kidney transplantation” OR “Renal transplant recipients”.*

El transplante renal es una cirugía limpia-contaminada sin penetrar en el tracto digestivo. Se ha asociado a una tasa de infección postoperatoria que oscila desde 10% a 56%, siendo la ITU (infección del tracto urinario) y la ILQ sus dos manifestaciones más comunes. La morbilidad relacionada con la pérdida del injerto debido a la infección se produjo hasta en un 33% de casos, según algunos estudios. La mortalidad asociada con infecciones postoperatorias en el paciente trasplantado de riñón es sustancial y oscila entre el 5 y el 30%9 .

Con profilaxis antimicrobiana, las ILQ en receptores de trasplante renal oscilan entre el 0 y el 11%, siendo la mayoría de estas infecciones de carácter superficial, y producidas dentro de los 30 días posteriores al trasplante. Los factores de riesgo de ILQ en el trasplante renal incluyen la contaminación de la perfusión de órganos, factores específicos del paciente como la diabetes, glomerulonefritis u obesidad; así como factores relacionados con el procedimiento, tales como la fuga ureteral o la formación de hematomas, la terapia inmunosupresora, y por último, las complicaciones postoperatorias como el rechazo agudo, reintervención y retraso de la función del injerto9. Se ha observado una diferencia significativa en las tasas de ILQ del trasplante renal en regímenes de inmunosupresión que incluyían micofenolato mofetilo frente a sirolimus, siendo este último un factor de riesgo independiente para ILQ9.

La ILQ en receptores de trasplante renal está causada por microorganismos grampositivos, en particular *Staphylococcus* spp. (incluyendo *S. aureus* y *S. epidermidis*) y *Enterococcus* spp., bacilos gramnegativos entre los que destacan *E. coli*, *Enterobacter* spp., *Klebsiella* spp., *Pseudomona aeruginosa* y, por otra parte, levaduras con *Candida* spp. La presencia de patógenos multirresistentes incluyeron SARM, *Staphylococcus* coagulasa negativos meticilin resistentes, *K. pneumoniae* productoras de betalactamasas de expectro extendido y *P. aeruginosa* resistentes a carbapenemasas. Estas resistencias podían estar en relación con el tratamiento antibiótico previo y el uso de profilaxis antibiótica de las ITU o para la neumonía por *Pneumocystis jiroveci* 9.

Con los estudios publicados hasta ahora acerca de la profilaxis antibiótica en pacientes receptores de un injerto renal es difícil establecer recomendaciones557–563. Un ensayo clínico controlado aleatorizado comparó la profilaxis antimicrobiana frente a no profilaxis, con beneficios en la prevención de la ILQ en el grupo de profilaxis, si bien presentó sesgos que limitan la máxima recomendación científica558. Sin embargo, en base a la literatura disponible, está justificado el uso rutinario de la profilaxis antimicrobiana sistémica en los pacientes sometidos a trasplante renal. En este sentido, son numerosos los estudios que clásicamente mostraron menores tasas de infección postoperatoria en pacientes con profilaxis antimicrobiana frente a no profilaxis, tanto en trasplante de donante vivo relacionado como en donante cadáver9.

Otro estudio aleatorizado controlado y multicéntrico comparó una dosis única de antibiótico frente a múltiples dosis, sin encontrar diferencias en la tasa de ILQ, aunque también presentó sesgos559. Cefazolina ha sido el agente más utilizado en la profilaxis antimicrobiana de la ILQ en el trasplante renal559,560. Un estudio aleatorizado y controlado que valoraba la posible necesidad o no de utilizar profilaxis quirúrgica con vancomicina, mostró que no parece disminuir las infecciones por grampositivos, aunque tampoco tuvo un efecto sobre la colonización o infección por *Enterococcus* resistentes a vancomicina561. En un estudio retrospectivo amikacina fue mejor que las cefalosporinas en la prevención de la infección quirúrgica, pero los principales microorganismos causantes de infección fueron enterobacterias productoras de BLEE564.

No hay evidencias sobre la necesidad de cambiar la profilaxis cuando existe colonización por microorganismos multirresistentes o bacteriuria pretrasplante en el donante o el receptor. El riesgo de candidiasis invasiva después del trasplante renal, a diferencia de lo que ocurre en el trasplante de páncreas, es demasiado bajo para justificar su profilaxis sistemática565 .

***Recomendaciones de profilaxis***

***Indicación:*** *Recomendada en el trasplante renal (A-II).*

***Antibiótico:*** *cefazolina (A-II), considerar añadir gentamicina si alta prevalencia de BGN resistentes (B-III).*

***Alérgicos:*** *vancomicina ± gentamicina (B-III).*

***Duración:*** *una dosis preoperatoria (A-II).*

- - 1. **Páncreas – Combinado páncreas/riñón**

*Términos de búsqueda: “Antimicrobial prophylaxis” AND “Pancreatic transplantation” OR “Simultaneous OR combined pancreas-kidney transplantation”.*

Las complicaciones infecciosas son la principal causa de morbilidad y mortalidad en pacientes sometidos a trasplante de páncreas o trasplante simultáneo de páncreas-riñón (SPK). La frecuencia de ILQ oscila entre el 7-50% de los pacientes trasplantados con profilaxis antimicrobiana, y la mayoría se producen en los primeros 30-90 días del trasplante. Las ITU son también frecuentes en este periodo, con tasas que van del 10,6% al 49% en receptores de trasplante de páncreas que recibieron profilaxis antimicrobiana, siendo mucho más comunes en los receptores con drenaje exocrino vesical en comparación con el drenaje entérico9.

El trasplante de páncreas y SPK se asocia a un mayor riesgo de ILQ y otras infecciones debido a la inmunosupresión de la propia diabetes mellitus combinada con los fármacos inmunosupresores utilizados para prevenir el rechazo del injerto, también con la prolongación de la cirugía y los tiempos de isquemia, la edad mayor de 55 años de los donantes, y el drenaje exocrino entérico frente al vesical. Los microorganismos implicados en las ILQ profundas suelen ser grampositivos (*Enterococcus* spp., *Streptococcus* spp., *Peptostreptococcus* spp.) y gramnegativos (*Enterobacter* spp., *Morganella* spp. y *B. fragilis*), pero también *Candida* spp. Rara vez están implicados anaerobios9.

Sólo un ensayo clinico controlado, no ciego, ha evaluado la profilaxis antibiótica en el trasplante de páncreas, pero no existe ninguno en trasplante SPK. Este ensayo, comentado en el apartado anterior de trasplante renal, se realizó principalmente en trasplantados renales, aunque incluyó también a 24 trasplantados de páncreas, y no se encontraró diferencia en la incidencia de infección postoperatoria con la utilización de vancomicina más gentamicina comparada con cefazolina más gentamicina561. El resto de estudios publicados son retrospectivos, y encuentran una reducción de la tasa de ILQ con el uso de la profilaxis del 7%-50% frente a controles históricos del 7%-33%561,566–572, pudiendo ser explicado por la variabilidad en las definiciones de ILQ, los diferentes regímenes de profilaxis antimicrobiana, los protocolos de inmunosupresión, y de las técnicas quirúrgicas. Se han utilizado una gran variedad de antimicrobianos, pero puesto que se tratan con frecuencia de infecciones incisionales y cefazolina parece ser tan efectiva como otras pautas en estudios observacionales, se recomienda la utilización de cafazolina9. De hecho, en un estudio retrospectivo570 en el trasplante de páncreas y combinado páncreas-riñon en el que utilizaron una dosis única preoperatoria de cefazolina, encontraron una tasa de ILQ superficial del 5% y de ILQ profundas del 11%, lo que llama la atención teniendo en cuenta las altas tasas de infección de trabajos posteriores utilizando profilaxis de mayor espectro y duración, en ocasiones producidas por hongos y microorganismos multirresistentes. Esto en parte pudo ser debido a la profilaxis prolongada y a la inclusión de infecciones no ILQ.

Es práctica habitual en muchos centros la profilaxis de amplio espectro en estos trasplantes, incluida la antifúngica y antiviral. Debido a la frecuente colonización duodenal de especies de *Candida* y a su aislamiento en ILQ, es habitual su administración en profilaxis quirúrgica. Se han descrito como factores de riesgo el drenaje entérico, la trombosis vascular y la pancreatitis postreperfusión571, claro que estos son factores postoperatorios que rara vez se pueden preveer antes de la cirugía. En un estudio observacional la profilaxis con fluconazol no redujo de forma significatica la ILQ por *Candida* spp.571, aunque en los pacientes con infección fúngica más bacteriana fue más frecuente el rechazo del trasplante y la mortalidad comparado con los pacientes con infección bacteriana sóla.

En resumen, no existen estudios clínicos controlados aleatorizados específicamente diseñados para evaluar la eficacia de la profilaxis antimicrobiana en el trasplante de páncreas y páncreas-riñón, lo que limita una recomendación de máxima evidencia. Sin embargo, el tipo de procedimiento quirúrgico, la susceptibilidad del huésped y la extrapolación de la alta evidencia disponible de la profilaxis antimicrobiana en la cirugía duodenal9,331, permite establecer su recomendación. El régimen recomendado es cefazolina, siendo una alternativa razonable en alérgicos a betalactámicos la utilización de clindamicina o vancomicina en combinación con un aminoglucósido (gentamicina). La duración de la profilaxis debe restringirse a 24 horas o menos. Para los pacientes con alto riesgo de infección por *Candida* (drenaje entérico, trombosis vascular, pancreatitis por reperfusión), fluconazol ajustado por la función renal podría ser considerado. Anfotericina B liposomal es preferible en centros con alta prevalencia en especies no albicans565.

***Recomendaciones de profilaxis***

***Indicación:*** *Recomendada en trasplante páncreas, páncreas-riñón (A-II)*

***Antibiótico:*** *cefazolina (A-II), o amoxicilina-ácido clavulánico (B-II) (por la frecuente implicación de enterococos).*

*Considerar añadir un aminoglucósido según la epidemiología local o la colonización previa por microorganismos multirresistentes (B-III).*

*Considerar añadir fluconazol si existe un riesgo alto de infección por Candida (drenaje entérico, trombosis vascular, pancreatitis por reperfusión) (C-III).*

***Alérgicos:*** *vancomicina más gentamicina (B-III)*

***Duración:*** *una dosis preoperatoria (A-II), dosis intraoperatorias adicionales si se prolonga la cirugía o hay grandes pérdidas sanguíneas (B-II).*

- - 1. **Hígado**

*Términos de búsqueda: “Antimicrobial prophylaxis” AND” Liver transplantation”.*

Más de 25.000 pacientes reciben en el mundo anualmente un trasplante hepático573. Este procedimiento se está incrementando cada vez más con buenos resultados y supervivencias al primer año superiores al 80%. La prevención de infecciones es un objetivo muy importante en este grupo de pacientes ya que son especialmente vulnerables al desarrollo de infecciones perioperatorias por la inmunosupresión, no solo por los fármacos, sino también por la cirrosis, la malnutrición, la duración prolongada de la cirugía y la transfusión de hemoderivados. La incidencia global de infección tras el trasplante hepático oscila entre el 53 y el 79%, la mayoría durante el primer mes postoperatorio574; entre el 10-37% son infecciones de la herida quirúrgica, y se han asociado a la pérdida del injerto y a una mayor mortalidad575. En una serie española de 1222 trasplantados hepáticos la incidencia de ILQ fue del 8,8% (10,3% la incidencia acumulada)576. Por lo tanto, aunque no existen estudios controlados prospectivos que evalúen la eficacia de la profilaxis antibiótica en esta cirugía, se recomiendan de forma rutinaria. Aunque hay estudios que cuestionan su eficacia, es usada globalmente, aunque la calidad de la evidencia de los estudios es muy variable577. En la actualidad, no hay ninguna recomendación formal en la profilaxis perioperatoria en los trasplantes de órgano sólido fuera de las guías de ISDA/ASHP/SIS/SHEA, aunque no es utilizada por muchos centros en EEUU9.

Se han descrito múltiples factores de riesgo asociados a la IHQ postrasplante hepático, tanto dependientes del huésped (estancia prolongada hospitalaria o en UCI, antibioterapia en los 3-4 meses previos, DM, hemocromatosis, categoría pronóstica elevada, ascitis, obesidad, cirugía hepática previa, trasplante hepático o renal previo), como relacionados con la cirugía (cirugía prolongada, entrada en tracto intestinal, anastomosis en Y de Roux, transfusión de más de 4 unidades de hematíes, fuga de la anastomosis), como del donante, o relacionados con el trasplante (rechazo, necesidad de diálisis, fármacos inmunosupresores)575,576,578.

Los microorganismos causantes de la infección de sitio quirúrgico en el trasplante hepático son fundamentalmente bacilos gramnegativos (principalmente enterobacterias y más raramente especies de *Acinetobacter* o *Pseudomonas*); seguidos de enterococos; *S. aureus* y estafilococos coagulasa negativa y *Candida* spp.576,579,580. Estos pacientes tienen tasas más altas de infecciones por microorganismos multirresistentes, sobre todo enterococos resistentes a vancomicina y enterobacterias productoras de betalactamasas de espectro extendido, y se ha asociado fundamentalmente al uso de antibioterapia previa al trasplante575 .

Como se ha comentado, no hay ensayos clínicos que evalúen la eficacia de diferentes tipos de antimicrobianos, y los estudios observacionales publicados suelen comparar antimicrobianos de amplio espectro (amoxicilina-ácido clavulánico, ampicilina-sulbactam, glucopéptido con cefalosporina de 3ª) con cefalosporinas de 1ª y 2ª generación con resultados diversos. Asensio et al, en su serie prospectiva de 1222 trasplantados hepáticos observaron más de 8 pautas de profilaxis quirúrgica, siendo las más frecuentes amoxicilina-ácido clavulánico y las combinaciones de glucopéptidos con penicilina antipseudomónica o glucopéptido con aztreonam576. Aunque cefazolina se asoció a mayor frecuencia de ILQ, no lo fue en el análisis ajustado. Los autores recomiendan amoxicilina-ácido clavulánico o la combinación de una cefalosporina de 3ª generación más amoxicilina en centros con baja incidencia de bacterias resistentes a penicilinas y de enterococos resistentes a vancomicina, sugiriendo vancomicina como profilaxis en los hospitales con alta prevalencia de SARM. Además, sugieren la utilidad de los cultivos de orina y heces pretrasplante para detectar enterococos multirresistentes, dado que son un serio problema en las unidades de trasplante576, pudiendo ser útiles también para la detección de otros microorganismos multirresistentes. Las guías americanas recomiendan la combinación cefalosporina de 3ª generación más ampicilina o piperacilina-tazobactam con una duración menor a 24 horas9, y una revisión reciente recomienda ampicilina-sulbactam no más de 48 horas. No existe evidencia que apoye un uso mayor de 24 horas, y la recomendación habría que hacerla por inferencia de la cirugía hepatobiliopancreática. Frenette et al, después de la aplicación de un programa de intervención para reducir la incidencia de ILQ en trasplante de hígado, riñón, páncreas, e intestino-páncreas-riñón, que incluía una series de medidas preventivas (rasurado, ducha preoperatoria y antisepsia de piel, ventilación en quirófano, lavado quirúrgico y uso de guantes) y en el caso del trasplante hepático, la profilaxis con ceftriaxona y vancomicina 30 min antes de la cirugía, lograron reducir la ILQ en esta cirugía de un 25% a un 10,7% (reducción del 58%, p=0,005)419.

Se ha sugerido que determinados agentes inmunosupresores harían más susceptible al paciente a determinadas infecciones, aunque Hadley et al. no hallaron diferencias entre tacrolimus y ciclosporina581 .

Muchos centros utilizan profilaxis antifúngica, aunque no hay estudios que avalen su uso. Los factores de riesgo asociados a la infección por *Candida* son el tiempo quirúrgico prolongado, la excesiva pérdida sanguínea, la colonización en el pretrasplante, la insuficiencia renal que requiera hemodiálisis, y la reintervención9,575,576. No hay evidencia que avale su utilización en pacientes previamente colonizados. No debe confundirse la profilaxis quirúrgica con la profilaxis antifúngica postrasplante.

Tampoco se han encontrado claros beneficios en la descontaminación intestinal selectiva ni en el uso de probióticos antes del trasplante9,575.

En resumen, no existen estudios comparativos de calidad que evalúen la eficacia de la profilaxis en el trasplante hepático y la mejor pauta de antibiótico. Las recomendaciones se basan en estudios observacionales y en la inferencia de la cirugía hepatobiliopancreática. Tampoco existe evidencia para recomendar la profilaxis antifúngica, ni una duración mayor de 24 horas. Dada la elevada prevalencia de ILQ por enterococos debería considerarse su cobertura a la hora de elegir la profilaxis.

***Recomendaciones de profilaxis***

***Indicación:*** *Recomendada en el trasplante hepático (A-II)*

***Antibiótico:*** *Amoxicilina-ácido clavulánico (A-III).*

*Considerar añadir un aminoglucósido según la epidemiología o la colonización previa por microorganismos multirresistentes (B-III).*

*Individualizar la profilaxis según la colonización o la infección previa al transplante (B-III).*

***Alérgicos:*** *vancomicina más gentamicina (B-III).*

***Duración:****≤ 24 horas (A-II), considerar dosis adicionales si se prolonga la cirugía o hay grandes pérdidas sanguíneas (B-II).*

- - 1. **Intestino delgado**

*Términos de búsqueda: “Antimicrobial prophylaxis” AND “Intestinal transplantation”.*

La incidencia de ILQ tras el trasplante de intestino delgado es muy alta, entre el 14% y el 53%, que puede llegar al 25,7-100% cuando se utilizan mallas para el cierre de la herida. La infección en el primer mes postrasplante se asocia a una elevada mortalidad. Se ha asociado el riesgo de infección con la edad, trasplante previo, hospitalización previa, necesidad de malla, reintervenciones, fístulas enterocutáneas, necesidad de colgajos, radioterapia e inmunosupresores575.

Las ILQ en esta cirugía suelen ser polimicrobianas, predominando los bacilos gramnegativos, especialmente enterobacterias y especies de pseudomonas. Le siguen los cocos grampositivos (enterococos y estafilococos), pero también son frecuentes anaerobios y levaduras, especialmente *Candida* spp. Se han descrito infecciones por microorganismos multirresistentes, como enterobacterias productoras de BLEE, *P. aeruginosa*, SARM y enterococos resistentes a vancomicina, posiblemente relacionados con la hospitalización y el tratamiento antimicrobiano previo a la infección.

La profilaxis antimicrobiana se utiliza de forma rutinaria, pero no existen estudios específicos, y las guías tampoco hacen recomendaciones al respecto. Se han utilizado pautas de amplio espectro con combinaciones que cubren grampositivos (incluyendo enterococos), gramnegativos (incluyendo *Pseudomonas*), anaerobios y hongos. Muchos pacientes tienen infecciones por los microorganismos que se han cubierto en la profilaxis, lo que sugiere que ésta no es suficiente para prevenir la infección en estos pacientes. Tampoco existe consenso sobre la duración, recomendándose pautas de hasta 72 horas. Posiblemente sea más adecuado mantener unos niveles óptimos de antibióticos durante toda la cirugía que prolongarla.

El régimen de profilaxis dependerá de los cultivos previos y de los factores de riesgo previos para tener una infección por un microorganismo multirresistente575.

Por tanto, estaría recomendada la profilaxis por inferencia de otras cirugías de trasplantes y el alto riesgo de infección postquirúrgica. Si no existen factores de riesgo de infección por microorganismos multirresistentes la profilaxis podría ser similar a la de la cirugía de colon: amoxicilina-ácido clavulánico más gentamicina, y si existe alergia a betalactámicos vancomicina más gentamicina más metronidazol. Habrá que ajustar la profilaxis según la microbiología previa y valorar añadir fluconazol si factores de riesgo de *Candida* spp. En este sentido, podrían utilizarse como predictores de infección por *Candida* los descritos en la literatura para infección quirúrgica en pacientes críticos: colonización por *Candida* en al menos 3 sitios en 2 screening consecutivos, o tener un índice de colonización >5 (nº de sitios positivos/nº de sitios cultivados), o infección previa por *Candida*582. Los cultivos de faringe, perineo y orina son los que tienen un mayor valor predictivo positivo (VPP), de tal forma que los 3 positivos en un solo screening aumenta el VPP al 99-100%583. Respecto a la duración de la profilaxis, no estaría recomendada más de 24 horas, y es recomendable redosificar cada 3 horas y si existen pérdidas de sangre importantes.

***Recomendaciones de profilaxis***

***Indicación:*** *Recomendada en trasplante de intestino delgado (A-II).*

***Antibiótico:*** *Si no factores de riesgo de infección por microorganismos multirresistentes: amoxicilina-ácido clavulánico más gentamicina (A-III).*

*Considerar ajustar la profilaxis a la microbiología previa, añadir fluconazol si factores de riesgo de Candida spp (B-III).*

***Alérgicos:*** *Vancomicina más gentamicina más metronidazol (B-III).*

***Duración:*** *≤ 24 horas (A-II), considerar dosis adicionales si se prolonga la cirugía o hay grandes pérdidas sanguíneas (A-III).*

- - 1. **Trasplante de corazón, pulmón y combinado corazón-pulmón**

*Términos de búsqueda: “Antimicrobial prophylaxis” AND “Solid organ transplantation” AND “Heart transplantation” OR “Lung transplantation”.*

Existen muy pocos estudios comparativos bien diseñados en profilaxis prequirúrgica en el trasplante de corazón, pulmón o de corazón-pulmón. En los diversos estudios, la profilaxis varía según las infecciones existentes en el donante o en el receptor584.

**Trasplante de corazón:** La infección sigue siendo una complicación importante, siendo la causa de muerte en el 14% de los pacientes durante el primer año post-trasplante585. La mediana de supervivencia del injerto es del 49% a los 10 años. Los procedimientos cardio-torácicos se asocian a una incidencia de ILQ que oscila entre el 9 y el 55% en los procedimientos que se realizan sin profilaxis586. La prevalencia de ILQ es del 5-9% en los pacientes sometidos a trasplante cardíaco en los que se realiza profilaxis587. Se han descrito varios factores de riesgo para la infección post-trasplante cardíaco: edad, uso de ciprofloxacino en profilaxis, cultivos de marcapasos positivos, procedimientos cardíacos previos, IMC>30 kg/m2, sexo femenino, inestabilidad hemodinámica, o uso previo de un dispositivo de asistencia ventricular587. Otros factores de riesgo para infección incluyen infecciones activas en el donante, tiempo hasta la reperfusión y el tipo de inmunosupresión. Además, la infección en el post-trasplante inmediato se ha asociado con mayores tasas de disfunción del injerto588. Los patógenos más frecuentemente implicados en estas infecciones son los grampositivos (fundamentalmente estafilococos)587. Otros microorganismos que pueden ocasionalmente estar implicados son enterobacterias, *P. aeruginosa*, *Stenotrophomonas maltophilia* o *Candida* spp. La incidencia de SARM y de enterococos resistentes a vancomicina (EVR) depende de la epidemiología local.

A pesar de la escasa literatura al respecto, parece claro que la profilaxis es segura y eficaz en este contexto584. En un estudio, la prevalencia de ILQ fue del 4,5% en pacientes a los que se administró profilaxis con cefotaxima y flucloxacilina589. Las cefalosporinas de 1ª y 2ª generación se consideran igualmente eficaces y son los antibióticos de elección590. No existe consenso en cuanto a la duración óptima de la profilaxis. Hay varios estudios que demuestran la utilidad de 24-48 horas de profilaxis con cefazolina o vancomicina591. Vancomicina (con o sin gentamicina) es una alternativa razonable en instituciones con una elevada prevalencia de SARM (ver punto 4.5), en pacientes colonizados por este microorganismo o en pacientes alérgicos a betalactámicos. Puede ser necesario administrar más dosis extras intraquirúrgicas si el procedimiento se prolonga más de 3 horas o si se produce una gran pérdida de sangre. Los pacientes con una infección asociada a un dispositivo de asistencia ventricular externa deben recibir una profilaxis adecuada al microorganismo implicado en dicha infección. Los pacientes que requieren ECMO (Extra-Corporeal Membrane Oxygenation) previo al trasplante se deben tratar de la misma manera.

**Trasplante de pulmón y de corazón-pulmón:** La supervivencia media a los 10 años es del 29% en los trasplantes de los dos pulmones, del 17% en los unipulmonares y del 26% en los cardio-pulmonares585. La infección es la complicación más frecuente después de un trasplante de pulmón y pulmón-corazón, siendo de hecho la primera causa de muerte durante el primer año post-trasplante (24,8% en pulmón y 18,3% en corazón-pulmón)585. La frecuencia de ILQ fue del 13%, siendo la mayoría de las infecciones de órgano-espacio (72%), con una tasa global de mediatinitis del 2,7% en un estudio592. Las infecciones de la anastomosis bronquial (especialmente las infecciones fúngicas) son potencialmente fatales en estos pacientes593. Los factores de riesgo más importantes para sufrir una infección son el grado de deterioro clínico en el momento del trasplante, el déficit de α-1 antitripsina y el retrasplante. Los factores de riesgo para desarrollar una neumonía incluyen la colonización o infección previa del donante por bacilos gramnegativos. Los factores predictores de mortalidad son la fibrosis quística, la infección nosocomial y la necesidad de ventilación mecánica antes del trasplante592. Los factores de riesgo para desarrollar una mediastinitis son el grado de inmunosupresión, la disfunción renal, la esternotomía previa y la reintervención debido a sangrado. Debemos tener en cuenta que el trasplante altera el aclaramiento mucociliar y suprime el reflejo de la tos, por lo que estos pacientes van a tener un riesgo elevado de desarrollar una neumonía584 .

Los microorganismos más relevantes en la infección asociada al trasplante de pulmón son los bacilos gramnegativos y los hongos, sin olvidar que los cocos grampositivos pueden estar implicados en casos mediastinitis. Los microorganismos más frecuentemente aislados en pacientes con ILQ son *P. aeruginosa*, *Candida* species, *S. aureus*, enterococos, *S. epidermidis*, *Burkholderia cepacia*, *E. coli* y *Klebsiella* species592 . El pulmón del donante juega un papel muy importante en la transmisión de patógenos al receptor. Casi el 90% de los cepillados bronquiales del donante son positivos para al menos un microorganismo. A su vez, el receptor también puede ser el foco de infección para el pulmón donante, como ocurre en los pacientes con fibrosis quística. En estos pacientes, además, los patógenos suelen ser multiresistentes.

No existen ensayos clínicos aleatorizados que definan la profilaxis más adecuada en esta población, sin embargo, la profilaxis en esta situación está universalmente aceptada584. El objetivo de la profilaxis en estos pacientes es evitar la ILQ además de la neumonía. De hecho, la frecuencia de neumonía post-trasplante disminuyó en un estudio de un 35 a un 10% gracias al uso de profilaxis594. Las cefalosporinas de 1ª y 2ª generación son los antimicrobianos más utilizados, sin embargo, la profilaxis debería modificarse para dar cobertura a cualquier patógeno que se haya aislado del tracto respiratorio del donante o del receptor. Los pacientes con fibrosis quística deberían recibir una profilaxis basada en los aislamientos (generalmente multiresistentes) previos. Los pacientes que requieran un ECMO como puente al trasplante y que tengan antecedentes de colonización o infección deberían recibir una profilaxis que incluya a los patógenos implicados.

Se han utilizado diferentes regímenes en estudios con utilización de ceftazidima, floxacilina, tobramicina e itraconazol además de anfotericina B inhalada592; cefepime en pacientes sin aislamientos previos595 o metronidazol y aztreonam596. La profilaxis antifúngica se debería considerar cuando los cultivos del pulmón donante o receptor son positivos para *Aspergillus* spp. o *Candida* spp.597. Respecto a la duración de la profilaxis hay trabajos que han evaluado duraciones desde 24-48 horas hasta 14 días. En los casos en los que se prolonga la profilaxis hasta 7-14 días, ésta se considera tratamiento en pacientes de riesgo y no profilaxis propiamente dicha.

***Recomendaciones de profilaxis***

***Indicación:*** *Recomendada en trasplante cardíaco (A-II).*

***Antibiótico:*** *cefazolina (A-II).*

*Aquellos pacientes diagnosticados de una infección asociada a un dispositivo de asistencia ventricular y que vayan a ser sometidos a un trasplante cardíaco deberían recibir profilaxis que incluya al microorganismo implicado (B-III).*

***Alérgicos:*** *vancomicina. Considerar añadir gentamicina según epidemiología local y el riesgo de infección por BGN (B-III).*

***Duración:*** *una dosis preoperatoria (A-II).*

***Recomendaciones de profilaxis***

***Indicación:*** *Recomendada en trasplante de pulmón y de corazón-pulmón (A-II).*

***Antibiótico:*** *cefazolina (A-II). Este régimen debe modificarse en aquellos pacientes con cultivos previos o con cultivos del donante positivos (B-III).*

*Aquellos pacientes diagnosticados de una infección asociada a un dispositivo de asistencia ventricular y que vayan a ser sometidos a un trasplante cardíaco deberían recibir profilaxis que incluya al microorganismo implicado (B-III).*

*La profilaxis puede incluir en algunas ocasiones antifúngicos con actividad frente a Candida o Aspergillus spp. en determinados pacientes (fibrosis quística, donante o receptor colonizados pretrasplante) (B-III).*

***Alérgicos:*** *vancomicina, considerar añadir gentamicina según epidemiología y riesgo de infección por BGN (B-III)*

***Duración:*** *≤24 h (A-II). No hay evidencia de que sea beneficioso mantener la profilaxis hasta la retirada de los drenajes.*

*Los pacientes trasplantados debido a una fibrosis quística deberían recibir tratamiento durante al menos 7 días que incluyan cobertura frente a los microorganismos aislados pretrasplante (B-II).*

1. **Conclusiones**

La profilaxis antibiótica es una de las principales medidas de prevención de la infección en cirugía. Su objetivo es asegurar la presencia de una alta concentración de antibiótico en los tejidos que van a ser intervenidos antes del inicio del procedimiento y durante toda su extensión. En general, está recomendada cuando las probabilidades de infección postoperatoria son elevadas o cuando sus consecuencias son potencialmente graves. Ello incluye, como mínimo, las intervenciones clasificadas como limpia-contaminada y contaminada y aquellas operaciones de cirugía limpia con implantación de material protésico.

Los antibióticos seleccionados deben ser activos frente a los microorganismos aislados con más frecuencia en cada tipo de procedimiento quirúrgico y suelen ser cefalosporinas de primera o segunda generación. Los fármacos deben administrarse por vía intravenosa en el intervalo de los 120 minutos previos a la incisión quirúrgica, a dosis máximas terapéuticas, con modificación en los pacientes obesos.

Para la mayoría de los procedimientos se recomienda una dosis única preoperatoria y nunca debe prolongarse más allá de las primeras 24 horas del postoperatorio. La redosificación intraoperatoria es más importante que la administración de dosis postoperatorias cuando la herida está ya cerrada y está indicada cuando el procedimiento quirúrgico excede dos veces la semivida del antibiótico.

Todo protocolo de profilaxis antibiótica en cirugía debería incluir el registro de los indicadores de su cumplimiento, el análisis de los resultados y el feed-back de los mismos a los miembros de los equipos quirúrgicos.

**Referencias**

1. Allegranzi B, Zayed B, Bischoff P, Kubilay NZ, de Jonge S, de Vries F, et al. New WHO recommendations on intraoperative and postoperative measures for surgical site infection prevention: an evidence-based global perspective. Lancet Infect Dis. 2016;16(12):e288-303.

2. Allegranzi B, Bischoff P, de Jonge S, Kubilay NZ, Zayed B, Gomes SM, et al. New WHO recommendations on preoperative measures for surgical site infection prevention: an evidence-based global perspective. Lancet Infect Dis. 2016;16(12):e276-87.

3. Badia JM, Casey AL, Petrosillo N, Hudson PM, Mitchell SA, Crosby C. Impact of surgical site infection on healthcare costs and patient outcomes: a systematic review in six European countries. J Hosp Infect. 2017;96(1):1-15.

4. Koek MBG, Hopmans TEM, Soetens LC, Wille JC, Geerlings SE, Vos MC, et al. Adhering to a national surgical care bundle reduces the risk of surgical site infections. PLoS ONE. 2017;12(9):e0184200.

5. Berríos-Torres SI, Umscheid CA, Bratzler DW, Leas B, Stone EC, Kelz RR, et al. Centers for Disease Control and Prevention Guideline for the Prevention of Surgical Site Infection, 2017. JAMA Surg. 2017;152(8):784-91.

6. Ozgun H, Ertugrul BM, Soyder A, Ozturk B, Aydemir M. Peri-operative antibiotic prophylaxis: adherence to guidelines and effects of educational intervention. Int J Surg. 2010;8(2):159-63.

7. Tourmousoglou CE, Yiannakopoulou EC, Kalapothaki V, Bramis J, St Papadopoulos J. Adherence to guidelines for antibiotic prophylaxis in general surgery: a critical appraisal. J Antimicrob Chemother. 2008;61(1):214-8.

8. Plachouras D, Kärki T, Hansen S, Hopkins S, Lyytikäinen O, Moro ML, et al. Antimicrobial use in European acute care hospitals: results from the second point prevalence survey (PPS) of healthcare-associated infections and antimicrobial use, 2016 to 2017. Eurosurveillance. 2018;23(46):1800393.

9. Bratzler DW, Dellinger EP, Olsen KM, Perl TM, Auwaerter PG, Bolon MK, et al. Clinical practice guidelines for antimicrobial prophylaxis in surgery. Am J Health Syst Pharm. 2013;70(3):195-283.

10. Surgical wound classification revision. BC Patient Safety & Quality Council, 2012. https://bcpsqc.ca/documents/2012/11/surgical-wound-classification-revision-2012.pdf.

11. Asensio A. [Surgical site infections: antibiotic prophylaxis in surgery]. Enferm Infecc Microbiol Clin. 2014;32(1):48-53.

12. Antimicrobial resistance and healthcare-associated infections - Annual epidemiological report 2014 [2012 data] [Internet]. European Centre for Disease Prevention and Control. 2015 [citado 27 de enero de 2019]. Disponible en: http://ecdc.europa.eu/en/publications-data/antimicrobial-resistance-and-healthcare-associated-infections-annual

13. Townsend TR, Reitz BA, Bilker WB, Bartlett JG. Clinical trial of cefamandole, cefazolin, and cefuroxime for antibiotic prophylaxis in cardiac operations. J Thorac Cardiovasc Surg. 1993;106(4):664-70.

14. Kreter B, Woods M. Antibiotic prophylaxis for cardiothoracic operations. Meta-analysis of thirty years of clinical trials. J Thorac Cardiovasc Surg. 1992;104(3):590-9.

15. Bratzler DW, Houck PM, Surgical Infection Prevention Guidelines Writers Workgroup, American Academy of Orthopaedic Surgeons, American Association of Critical Care Nurses, American Association of Nurse Anesthetists, et al. Antimicrobial prophylaxis for surgery: an advisory statement from the National Surgical Infection Prevention Project. Clin Infect Dis. 2004;38(12):1706-15.

16. Engelman R, Shahian D, Shemin R, Guy TS, Bratzler D, Edwards F, et al. The Society of Thoracic Surgeons practice guideline series: Antibiotic prophylaxis in cardiac surgery, part II: Antibiotic choice. Ann Thorac Surg. 2007;83(4):1569-76.

17. Mui LM, Ng CSH, Wong SKH, Lam Y-H, Fung TMK, Fok K-L, et al. Optimum duration of prophylactic antibiotics in acute non-perforated appendicitis. ANZ J Surg. 2005;75(6):425-8.

18. Bolon MK, Morlote M, Weber SG, Koplan B, Carmeli Y, Wright SB. Glycopeptides are no more effective than beta-lactam agents for prevention of surgical site infection after cardiac surgery: a meta-analysis. Clin Infect Dis. 2004;38(10):1357-63.

19. Chambers D, Worthy G, Myers L, Weatherly H, Elliott R, Hawkins N, et al. Glycopeptide vs. non-glycopeptide antibiotics for prophylaxis of surgical site infections: a systematic review. Surg Infect (Larchmt). 2010;11(5):455-62.

20. Voigt J, Mosier M, Darouiche R. Systematic review and meta-analysis of randomized controlled trials of antibiotics and antiseptics for preventing infection in people receiving primary total hip and knee prostheses. Antimicrob Agents Chemother. 2015;59(11):6696-707.

21. Nelson RL, Gladman E, Barbateskovic M. Antimicrobial prophylaxis for colorectal surgery. Cochrane Database Syst Rev. 2014;(5):CD001181.

22. de Jonge SW, Gans SL, Atema JJ, Solomkin JS, Dellinger PE, Boermeester MA. Timing of preoperative antibiotic prophylaxis in 54,552 patients and the risk of surgical site infection: A systematic review and meta-analysis. Medicine (Baltimore). 2017;96(29):e6903.

23. Classen DC, Evans RS, Pestotnik SL, Horn SD, Menlove RL, Burke JP. The timing of prophylactic administration of antibiotics and the risk of surgical-wound infection. N Engl J Med. 1992;326(5):281-6.

24. Muñoz Platón E, Jiménez Antolín JA, Brea Zubigaray S, Bravo García P. [The effect of surgical antibiotic prophylaxis and the timing of its administration on the risk of surgical wound infection]. Rev Clin Esp. 1995;195(10):669-73.

25. Lizán-García M, García-Caballero J, Asensio-Vegas A. Risk factors for surgical-wound infection in general surgery: a prospective study. Infect Control Hosp Epidemiol. 1997;18(5):310-5.

26. Garey KW, Dao T, Chen H, Amrutkar P, Kumar N, Reiter M, et al. Timing of vancomycin prophylaxis for cardiac surgery patients and the risk of surgical site infections. J Antimicrob Chemother. 2006;58(3):645-50.

27. Kasatpibal N, Nørgaard M, Sørensen HT, Schønheyder HC, Jamulitrat S, Chongsuvivatwong V. Risk of surgical site infection and efficacy of antibiotic prophylaxis: a cohort study of appendectomy patients in Thailand. BMC Infect Dis. 2006;6:111.

28. van Kasteren MEE, Manniën J, Ott A, Kullberg B-J, de Boer AS, Gyssens IC. Antibiotic prophylaxis and the risk of surgical site infections following total hip arthroplasty: timely administration is the most important factor. Clin Infect Dis. 2007;44(7):921-7.

29. Weber WP, Mujagic E, Zwahlen M, Bundi M, Hoffmann H, Soysal SD, et al. Timing of surgical antimicrobial prophylaxis: a phase 3 randomised controlled trial. Lancet Infect Dis. 2017;17(6):605-14.

30. Steinberg JP, Braun BI, Hellinger WC, Kusek L, Bozikis MR, Bush AJ, et al. Timing of antimicrobial prophylaxis and the risk of surgical site infections: results from the Trial to Reduce Antimicrobial Prophylaxis Errors. Ann Surg. 2009;250(1):10-6.

31. Ho VP, Barie PS, Stein SL, Trencheva K, Milsom JW, Lee SW, et al. Antibiotic regimen and the timing of prophylaxis are important for reducing surgical site infection after elective abdominal colorectal surgery. Surg Infect (Larchmt). 2011;12(4):255-60.

32. Koch CG, Nowicki ER, Rajeswaran J, Gordon SM, Sabik JF, Blackstone EH. When the timing is right: Antibiotic timing and infection after cardiac surgery. J Thorac Cardiovasc Surg. 2012;144(4):931-937.e4.

33. El-Mahallawy HA, Hassan SS, Khalifa HI, El-Sayed Safa MM, Khafagy MM. Comparing a combination of penicillin G and gentamicin to a combination of clindamycin and amikacin as prophylactic antibiotic regimens in prevention of clean contaminated wound infections in cancer surgery. J Egypt Natl Canc Inst. 2013;25(1):31-5.

34. Koch CG, Li L, Hixson E, Tang A, Gordon S, Longworth D, et al. Is it time to refine? An exploration and simulation of optimal antibiotic timing in general surgery. J Am Coll Surg. 2013;217(4):628-35.

35. Wu W-T, Tai F-C, Wang P-C, Tsai M-L. Surgical site infection and timing of prophylactic antibiotics for appendectomy. Surg Infect (Larchmt). 2014;15(6):781-5.

36. Trick WE, Scheckler WE, Tokars JI, Jones KC, Reppen ML, Smith EM, et al. Modifiable risk factors associated with deep sternal site infection after coronary artery bypass grafting. J Thorac Cardiovasc Surg. 2000;119(1):108-14.

37. Akinyoola AL, Adegbehingbe OO, Odunsi A. Timing of antibiotic prophylaxis in tourniquet surgery. J Foot Ankle Surg. 2011;50(4):374-6.

38. Soriano A, Bori G, García-Ramiro S, Martinez-Pastor JC, Miana T, Codina C, et al. Timing of antibiotic prophylaxis for primary total knee arthroplasty performed during ischemia. Clin Infect Dis. 2008;46(7):1009-14.

39. Prats L, Valls J, Ros J, Jover A, Pérez-Villar F, Fernández-Martínez JJ. Influence of the ischaemic tourniquet in antibiotic prophylaxis in total knee replacement. Rev Esp Cir Ortop Traumatol. 2015;59(4):275-80.

40. Crawford T, Rodvold KA, Solomkin JS. Vancomycin for surgical prophylaxis? Clin Infect Dis. 2012;54(10):1474-9.

41. Pai MP. Treatment of bacterial infections in obese adult patients: how to appropriately manage antimicrobial dosage. Curr Opin Pharmacol. 2015;24:12-7.

42. Hites M, Deprez G, Wolff F, Ickx B, Verleije A, Closset J, et al. Evaluation of total body weight and body mass index cut-offs for increased cefazolin dose for surgical prophylaxis. Int J Antimicrob Agents. 2016;48(6):633-40.

43. Hong J, Krop LC, Johns T, Pai MP. Individualized vancomycin dosing in obese patients: a two-sample measurement approach improves target attainment. Pharmacotherapy. 2015;35(5):455-63.

44. Hidayat LK, Hsu DI, Quist R, Shriner KA, Wong-Beringer A. High-dose vancomycin therapy for methicillin-resistant Staphylococcus aureus infections: efficacy and toxicity. Arch Intern Med. 2006;166(19):2138-44.

45. Pea F, Furlanut M, Stellini R, Bonardelli S, Signorini L, Pavan F, et al. Pharmacokinetic-pharmacodynamic aspects of antimicrobial prophylaxis with teicoplanin in patients undergoing major vascular surgery. Int J Antimicrob Agents. 2006;27(1):15-9.

46. How should antibiotics be dosed in obesity? – SPS - Specialist Pharmacy Service – The first stop for professional medicines advice [Internet]. [citado 12 de febrero de 2019]. Disponible en: https://www.sps.nhs.uk/articles/how-should-antibiotics-be-dosed-in-obesity/

47. Pai MP, Rodvold KA. Aminoglycoside dosing in patients by kidney function and area under the curve: the Sawchuk-Zaske dosing method revisited in the era of obesity. Diagn Microbiol Infect Dis. 2014;78(2):178-87.

48. Pai MP, Cojutti P, Pea F. Levofloxacin dosing regimen in severely morbidly obese patients (BMI ≥40 kg/m(2)) should be guided by creatinine clearance estimates based on ideal body weight and optimized by therapeutic drug monitoring. Clin Pharmacokinet. 2014;53(8):753-62.

49. Voigt J, Mosier M, Darouiche R. Systematic review and meta-analysis of randomized controlled trials of antibiotics and antiseptics for preventing infection in people receiving primary total hip and knee prostheses. Antimicrob Agents Chemother. 2015;59(11):6696-707.

50. Torres MJ, Moreno E, Moya MC, Blanca N, Audicana M. Alergia a los antibióticos betalactámicos. En: Tratado de Alergología de la SEAIC TOMO IV. 2a. Madrid: Ergon; 2016. p. 1495-513.

51. Zanetti G, Giardina R, Platt R. Intraoperative redosing of cefazolin and risk for surgical site infection in cardiac surgery. Emerging Infect Dis. 2001;7(5):828-31.

52. Isla A, Trocóniz IF, de Tejada IL, Vázquez S, Canut A, López JM, et al. Population pharmacokinetics of prophylactic cefoxitin in patients undergoing colorectal surgery. Eur J Clin Pharmacol. 2012;68(5):735-45.

53. Asín-Prieto E, Soraluce A, Trocóniz IF, Campo Cimarras E, Sáenz de Ugarte Sobrón J, Rodríguez-Gascón A, et al. Population pharmacokinetic models for cefuroxime and metronidazole used in combination as prophylactic agents in colorectal surgery: Model-based evaluation of standard dosing regimens. Int J Antimicrob Agents. 2015;45(5):504-11.

54. De Cock PAJG, Mulla H, Desmet S, De Somer F, McWhinney BC, Ungerer JPJ, et al. Population pharmacokinetics of cefazolin before, during and after cardiopulmonary bypass to optimize dosing regimens for children undergoing cardiac surgery. J Antimicrob Chemother. 2017;72(3):791-800.

55. Calic D, Ariano RE, Arora RC, Grocott HP, Lakowski TM, Lillico R, et al. Evaluation of cefazolin antimicrobial prophylaxis during cardiac surgery with cardiopulmonary bypass. J Antimicrob Chemother. 2017;

56. Swoboda SM, Merz C, Kostuik J, Trentler B, Lipsett PA. Does intraoperative blood loss affect antibiotic serum and tissue concentrations? Arch Surg. 1996;131(11):1165-71; discussion 1171-1172.

57. Levy M, Egersegi P, Strong A, Tessoro A, Spino M, Bannatyne R, et al. Pharmacokinetic analysis of cloxacillin loss in children undergoing major surgery with massive bleeding. Antimicrob Agents Chemother. 1990;34(6):1150-3.

58. Bratzler DW, Dellinger EP, Olsen KM, Perl TM, Auwaerter PG, Bolon MK, et al. Clinical practice guidelines for antimicrobial prophylaxis in surgery. Am J Health Syst Pharm. 2013;70(3):195-283.

59. Mensa J, Gatell JM, García-Sánchez JE, Letang E, López-Suñé E, Marco F. Guía de Terapéutica Antimicrobiana 2017. Barcelona: Antares; 2017.

60. Song F, Glenny AM. Antimicrobial prophylaxis in colorectal surgery: a systematic review of randomised controlled trials. Health Technol Assess. 1998;2(7):1-110.

61. Velmahos GC, Toutouzas KG, Sarkisyan G, Chan LS, Jindal A, Karaiskakis M, et al. Severe trauma is not an excuse for prolonged antibiotic prophylaxis. Arch Surg. 2002;137(5):537-41; discussion 541-542.

62. Engesaeter LB, Lie SA, Espehaug B, Furnes O, Vollset SE, Havelin LI. Antibiotic prophylaxis in total hip arthroplasty: effects of antibiotic prophylaxis systemically and in bone cement on the revision rate of 22,170 primary hip replacements followed 0-14 years in the Norwegian Arthroplasty Register. Acta Orthop Scand. 2003;74(6):644-51.

63. Thornley P, Evaniew N, Riediger M, Winemaker M, Bhandari M, Ghert M. Postoperative antibiotic prophylaxis in total hip and knee arthroplasty: a systematic review and meta-analysis of randomized controlled trials. CMAJ Open. 2015;3(3):E338-343.

64. Blumenthal KG, Ryan EE, Li Y, Lee H, Kuhlen JL, Shenoy ES. The Impact of a Reported Penicillin Allergy on Surgical Site Infection Risk. Clin Infect Dis. 2018;66(3):329-36.

65. Audicana M, Bernaola G, Urrutia I, Echechipia S, Gastaminza G, Muñoz D, et al. Allergic reactions to betalactams: studies in a group of patients allergic to penicillin and evaluation of cross-reactivity with cephalosporin. Allergy. 1994;49(2):108-13.

66. Carignan A, Allard C, Pépin J, Cossette B, Nault V, Valiquette L. Risk of Clostridium difficile infection after perioperative antibacterial prophylaxis before and during an outbreak of infection due to a hypervirulent strain. Clin Infect Dis. 2008;46(12):1838-43.

67. Starks I, Ayub G, Walley G, Orendi J, Roberts P, Maffulli N. Single-dose cefuroxime with gentamicin reduces *Clostridium difficile*-associated disease in hip-fracture patients. J Hosp Infect. 2008;70(1):21-6.

68. Jenkins PJ, Teoh K, Simpson PM, Dave J, Simpson AHWR, Breusch S. *Clostridium difficile* in patients undergoing primary hip and knee replacement. J Bone Joint Surg Br. julio de 2010;92(7):994-8.

69. Branch-Elliman W, O’Brien W, Strymish J, Itani K, Wyatt C, Gupta K. Association of Duration and Type of Surgical Prophylaxis With Antimicrobial-Associated Adverse Events. JAMA Surg. 2019;154(7):590-8.

70. Avery CME, Ameerally P, Castling B, Swann RA. Infection of surgical wounds in the maxillofacial region and free flap donor sites with methicillin-resistant *Staphylococcus aureus*. Br J Oral Maxillofac Surg. 2006;44(3):217-21.

71. Harbarth S, Samore MH, Lichtenberg D, Carmeli Y. Prolonged antibiotic prophylaxis after cardiovascular surgery and its effect on surgical site infections and antimicrobial resistance. Circulation. 2000;101(25):2916-21.

72. Walker H, Patton A, Bayne G, Marwick C, Sneddon J, Davey P, et al. Reduction in post-operative acute kidney injury following a change in antibiotic prophylaxis policy for orthopaedic surgery: an observational study. J Antimicrob Chemother. 2016;71(9):2598-605.

73. Bell S, Dekker FW, Vadiveloo T, Marwick C, Deshmukh H, Donnan PT, et al. Risk of postoperative acute kidney injury in patients undergoing orthopaedic surgery--development and validation of a risk score and effect of acute kidney injury on survival: observational cohort study. BMJ. 2015;351:h5639.

74. Kellum JA, Lameire N, Aspelin P, Barsoum RS, Burdmann EA, Goldstein SL, et al. Kidney disease: Improving global outcomes (KDIGO) acute kidney injury work group. KDIGO clinical practice guideline for acute kidney injury. Kidney International Supplements. 2012;2(1):1-138.

75. Bell S, Davey P, Nathwani D, Marwick C, Vadiveloo T, Sneddon J, et al. Risk of AKI with gentamicin as surgical prophylaxis. J Am Soc Nephrol. 2014;25(11):2625-32.

76. Craxford S, Bayley E, Needoff M. Antibiotic-associated complications following lower limb arthroplasty: a comparison of two prophylactic regimes. Eur J Orthop Surg Traumatol. 2014;24(4):539-43.

77. Courtney PM, Melnic CM, Zimmer Z, Anari J, Lee G-C. Addition of Vancomycin to Cefazolin Prophylaxis Is Associated With Acute Kidney Injury After Primary Joint Arthroplasty. Clin Orthop Relat Res. 2015;473(7):2197-203.

78. Walsh TL, Querry AM, McCool S, Galdys AL, Shutt KA, Saul MI, et al. Risk Factors for Surgical Site Infections Following Neurosurgical Spinal Fusion Operations: A Case Control Study. Infect Control Hosp Epidemiol. 2017;38(3):340-7.

79. Ramirez MC, Marchessault M, Govednik-Horny C, Jupiter D, Papaconstantinou HT. The impact of MRSA colonization on surgical site infection following major gastrointestinal surgery. J Gastrointest Surg. 2013;17(1):144-52; discussion p.152.

80. Gupta K, Strymish J, Abi-Haidar Y, Williams SA, Itani KMF. Preoperative nasal methicillin-resistant *Staphylococcus aureus* status, surgical prophylaxis, and risk-adjusted postoperative outcomes in veterans. Infect Control Hosp Epidemiol. 2011;32(8):791-6.

81. Azarbal AF, Harris S, Mitchell EL, Liem TK, Landry GJ, McLafferty RB, et al. Nasal methicillin-resistant *Staphylococcus aureus* colonization is associated with increased wound occurrence after major lower extremity amputation. J Vasc Surg. 2015;62(2):401-5.

82. Thakkar V, Ghobrial GM, Maulucci CM, Singhal S, Prasad SK, Harrop JS, et al. Nasal MRSA colonization: impact on surgical site infection following spine surgery. Clin Neurol Neurosurg. 2014;125:94-7.

83. Levy P-Y, Ollivier M, Drancourt M, Raoult D, Argenson J-N. Relation between nasal carriage of *Staphylococcus aureus* and surgical site infection in orthopedic surgery: the role of nasal contamination. A systematic literature review and meta-analysis. Orthop Traumatol Surg Res. 2013;99(6):645-51.

84. Kalra L, Camacho F, Whitener CJ, Du P, Miller M, Zalonis C, et al. Risk of methicillin-resistant *Staphylococcus aureus* surgical site infection in patients with nasal MRSA colonization. Am J Infect Control. 2013;41(12):1253-7.

85. Dubinsky-Pertzov B, Temkin E, Harbarth S, Fankhauser-Rodriguez C, Carevic B, Radovanovic I, et al. Carriage of Extended-spectrum Beta-lactamase-producing Enterobacteriaceae and the Risk of Surgical Site Infection After Colorectal Surgery: A Prospective Cohort Study. Clin Infect Dis. 2019;68(10):1699-704.

86. Cheikh A, Belefquih B, Chajai Y, Cheikhaoui Y, El Hassani A, Benouda A. *Enterobacteriaceae* producing extended-spectrum β-lactamases (ESBLs) colonization as a risk factor for developing ESBL infections in pediatric cardiac surgery patients: «retrospective cohort study». BMC Infect Dis. 2017;17(1):237.

87. Moremi N, Claus H, Rutta L, Frosch M, Vogel U, Mshana SE. High carriage rate of extended-spectrum beta-lactamase-producing *Enterobacteriaceae* among patients admitted for surgery in Tanzanian hospitals with a low rate of endogenous surgical site infections. J Hosp Infect. 2018;100(1):47-53.

88. Stone PA, AbuRahma AF, Campbell JR, Hass SM, Mousa AY, Nanjundappa A, et al. Prospective randomized double-blinded trial comparing 2 anti-MRSA agents with supplemental coverage of cefazolin before lower extremity revascularization. Ann Surg. 2015;262(3):495-501; discussion 500-501.

89. Saleh A, Khanna A, Chagin KM, Klika AK, Johnston D, Barsoum WK. Glycopeptides versus β-lactams for the prevention of surgical site infections in cardiovascular and orthopedic surgery: a meta-analysis. Ann Surg. 2015;261(1):72-80.

90. Schweizer M, Perencevich E, McDanel J, Carson J, Formanek M, Hafner J, et al. Effectiveness of a bundled intervention of decolonization and prophylaxis to decrease Gram positive surgical site infections after cardiac or orthopedic surgery: systematic review and meta-analysis. BMJ. 2013;346:f2743.

91. Branch-Elliman W, Ripollone JE, O’Brien WJ, Itani KMF, Schweizer ML, Perencevich E, et al. Risk of surgical site infection, acute kidney injury, and *Clostridium difficile* infection following antibiotic prophylaxis with vancomycin plus a beta-lactam versus either drug alone: A national propensity-score-adjusted retrospective cohort study. PLoS Med. 2017;14(7):e1002340.

92. Schweizer ML, Chiang H-Y, Septimus E, Moody J, Braun B, Hafner J, et al. Association of a bundled intervention with surgical site infections among patients undergoing cardiac, hip, or knee surgery. JAMA. 2015;313(21):2162-71.

93. Phuphuakrat A, Choomai A, Kiertiburanakul S, Malathum K. Antibiotic prophylaxis for cardiac surgery in a setting with high prevalence of extended-spectrum beta-lactamase-producing Gram-negative bacteria. J Hosp Infect. 2016;93(4):362-3.

94. Nutman A, Temkin E, Harbarth S, Carevic B, Ris F, Fankhauser-Rodriguez C, et al. Personalized Ertapenem Prophylaxis for Carriers of Extended-spectrum β-Lactamase–producing *Enterobacteriaceae* Undergoing Colorectal Surgery. Clin Infect Dis [Internet]. [citado 8 de octubre de 2019]; Disponible en: https://academic.oup.com/cid/advance-article/doi/10.1093/cid/ciz524/5521656

95. Ariyan S, Martin J, Lal A, Cheng D, Borah GL, Chung KC, et al. Antibiotic prophylaxis for preventing surgical-site infection in plastic surgery: an evidence-based consensus conference statement from the American Association of Plastic Surgeons. Plast Reconstr Surg. 2015;135(6):1723-39.

96. Cherian P, Gunson T, Borchard K, Tai Y, Smith H, Vinciullo C. Oral antibiotics versus topical decolonization to prevent surgical site infection after Mohs micrographic surgery--a randomized, controlled trial. Dermatol Surg. 2013;39(10):1486-93.

97. Smack DP, Harrington AC, Dunn C, Howard RS, Szkutnik AJ, Krivda SJ, et al. Infection and allergy incidence in ambulatory surgery patients using white petrolatum vs bacitracin ointment. A randomized controlled trial. JAMA. 1996;276(12):972-7.

98. Rosengren H, Dixon A. Antibacterial prophylaxis in dermatologic surgery: an evidence-based review. Am J Clin Dermatol. 2010;11(1):35-44.

99. Dixon AJ, Dixon MP, Askew DA, Wilkinson D. Prospective study of wound infections in dermatologic surgery in the absence of prophylactic antibiotics. Dermatol Surg. 2006;32(6):819-26; discussion 826-827.

100. Wright TI, Baddour LM, Berbari EF, Roenigk RK, Phillips PK, Jacobs MA, et al. Antibiotic prophylaxis in dermatologic surgery: advisory statement 2008. J Am Acad Dermatol. 2008;59(3):464-73.

101. Sevin A, Senen D, Sevin K, Erdogan B, Orhan E. Antibiotic use in abdominoplasty: prospective analysis of 207 cases. J Plast Reconstr Aesthet Surg. 2007;60(4):379-82.

102. Sanabria A, Domínguez LC, Valdivieso E, Gómez G. Prophylactic antibiotics for mesh inguinal hernioplasty: a meta-analysis. Ann Surg. 2007;245(3):392-6.

103. Yin Y, Song T, Liao B, Luo Q, Zhou Z. Antibiotic prophylaxis in patients undergoing open mesh repair of inguinal hernia: a meta-analysis. Am Surg. 2012;78(3):359-65.

104. Mazaki T, Mado K, Masuda H, Shiono M. Antibiotic prophylaxis for the prevention of surgical site infection after tension-free hernia repair: a Bayesian and frequentist meta-analysis. J Am Coll Surg. 2013;217(5):788-801.e1-4.

105. Sanchez-Manuel FJ, Lozano-García J, Seco-Gil JL. Antibiotic prophylaxis for hernia repair. Cochrane Database Syst Rev. 2012;(2):CD003769.

106. Erdas E, Medas F, Pisano G, Nicolosi A, Calò PG. Antibiotic prophylaxis for open mesh repair of groin hernia: systematic review and meta-analysis. Hernia. 2016;20(6):765-76.

107. Boonchan T, Wilasrusmee C, McEvoy M, Attia J, Thakkinstian A. Network meta-analysis of antibiotic prophylaxis for prevention of surgical-site infection after groin hernia surgery. Br J Surg. 2017;104(2):e106-17.

108. McCormack K, Wake B, Perez J, Fraser C, Cook J, McIntosh E, et al. Laparoscopic surgery for inguinal hernia repair: systematic review of effectiveness and economic evaluation. Health Technol Assess. 2005;9(14):1-203, iii-iv.

109. Köckerling F, Bittner R, Jacob D, Schug-Pass C, Laurenz C, Adolf D, et al. Do we need antibiotic prophylaxis in endoscopic inguinal hernia repair? Results of the Herniamed Registry. Surg Endosc. 2015;29(12):3741-9.

110. Kaoutzanis C, Leichtle SW, Mouawad NJ, Welch KB, Lampman RM, Cleary RK. Postoperative surgical site infections after ventral/incisional hernia repair: a comparison of open and laparoscopic outcomes. Surg Endosc. 2013;27(6):2221-30.

111. Poelman MM, van den Heuvel B, Deelder JD, Abis GSA, Beudeker N, Bittner RR, et al. EAES Consensus Development Conference on endoscopic repair of groin hernias. Surg Endosc. 2013;27(10):3505-19.

112. Miserez M, Peeters E, Aufenacker T, Bouillot JL, Campanelli G, Conze J, et al. Update with level 1 studies of the European Hernia Society guidelines on the treatment of inguinal hernia in adult patients. Hernia. 2014;18(2):151-63.

113. Huang N, Liu M, Yu P, Wu J. Antibiotic prophylaxis in prosthesis-based mammoplasty: a systematic review. Int J Surg. 2015;15:31-7.

114. Jones DJ, Bunn F, Bell-Syer SV. Prophylactic antibiotics to prevent surgical site infection after breast cancer surgery. Cochrane Database Syst Rev. 2014;(3):CD005360.

115. Shortt R, Cooper MJ, Farrokhyar F, Bain J. Meta-analysis of antibiotic prophylaxis in breast reduction surgery. Plast Surg (Oakv). 2014;22(2):91-4.

116. Scottish Intercollegiate Guidelines Network (SIGN). Antibiotic prophylaxis in surgery. Edinburgh: SIGN; 2008. (SIGN publication no.104). [July 2008]. Available from URL: http://www.sign.ac.uk).

117. Edwards JR, Peterson KD, Mu Y, Banerjee S, Allen-Bridson K, Morrell G, et al. National Healthcare Safety Network (NHSN) report: data summary for 2006 through 2008, issued December 2009. Am J Infect Control. 2009;37(10):783-805.

118. Baddour LM, Bettmann MA, Bolger AF, Epstein AE, Ferrieri P, Gerber MA, et al. Nonvalvular cardiovascular device-related infections. Circulation. 2003;108(16):2015-31.

119. Mertz D, Johnstone J, Loeb M. Does duration of perioperative antibiotic prophylaxis matter in cardiac surgery? A systematic review and meta-analysis. Ann Surg. 2011;254(1):48-54.

120. de Oliveira JC, Martinelli M, Nishioka SAD, Varejão T, Uipe D, Pedrosa AAA, et al. Efficacy of antibiotic prophylaxis before the implantation of pacemakers and cardioverter-defibrillators: results of a large, prospective, randomized, double-blinded, placebo-controlled trial. Circ Arrhythm Electrophysiol. 2009;2(1):29-34.

121. Chambers CE, Eisenhauer MD, McNicol LB, Block PC, Phillips WJ, Dehmer GJ, et al. Infection control guidelines for the cardiac catheterization laboratory: society guidelines revisited. Catheter Cardiovasc Interv. 2006;67(1):78-86.

122. Loverix L, Juvonen T, Biancari F. Prosthetic endocarditis after transcatheter aortic valve implantation: pooled individual patient outcome. Int J Cardiol. 2015;178:67-8.

123. Martínez-Sellés M, Bouza E, Díez-Villanueva P, Valerio M, Fariñas MC, Muñoz-García AJ, et al. Incidence and clinical impact of infective endocarditis after transcatheter aortic valve implantation. EuroIntervention. 2016;11(10):1180-7.

124. Habib G, Lancellotti P, Antunes MJ, Bongiorni MG, Casalta J-P, Del Zotti F, et al. 2015 ESC Guidelines for the management of infective endocarditis: The Task Force for the Management of Infective Endocarditis of the European Society of Cardiology (ESC). Endorsed by: European Association for Cardio-Thoracic Surgery (EACTS), the European Association of Nuclear Medicine (EANM). Eur Heart J. 2015;36(44):3075-128.

125. Ramos-Martinez A, Cobo M, Munez E, Restrepo A, Fernandez-Cruz A. Searching for the best agent for antibiotic prophylaxis in patients undergoing transcatheter aortic valve implantation. J Hosp Infect. 2018;100(4):458-9.

126. Klug D, Balde M, Pavin D, Hidden-Lucet F, Clementy J, Sadoul N, et al. Risk factors related to infections of implanted pacemakers and cardioverter-defibrillators: results of a large prospective study. Circulation. 2007;116(12):1349-55.

127. Sohail MR, Uslan DZ, Khan AH, Friedman PA, Hayes DL, Wilson WR, et al. Risk factor analysis of permanent pacemaker infection. Clin Infect Dis. 2007;45(2):166-73.

128. Da Costa A, Kirkorian G, Cucherat M, Delahaye F, Chevalier P, Cerisier A, et al. Antibiotic prophylaxis for permanent pacemaker implantation: a meta-analysis. Circulation. 1998;97(18):1796-801.

129. Baddour LM, Epstein AE, Erickson CC, Knight BP, Levison ME, Lockhart PB, et al. Update on cardiovascular implantable electronic device infections and their management: a scientific statement from the American Heart Association. Circulation. 2010;121(3):458-77.

130. Acharya MN, Som R, Tsui S. What is the optimum antibiotic prophylaxis in patients undergoing implantation of a left ventricular assist device? Interact Cardiovasc Thorac Surg. 2012;14(2):209-14.

131. Aburjania N, Ertmer BM, Farid S, Berg M, Nienaber JJC, Tchantchaleishvili V, et al. Single Versus Multidrug Regimen for Surgical Infection Prophylaxis in Left Ventricular Assist Device Implantation. ASAIO J. 2018;64(6):735-40.

132. Lim SH, Smith MP, Salooja N, Machin SJ, Goldstone AH. A prospective randomized study of prophylactic teicoplanin to prevent early Hickman catheter-related sepsis in patients receiving intensive chemotherapy for haematological malignancies. J Antimicrob Chemother. 1991;28(1):109-16.

133. McKee R, Dunsmuir R, Whitby M, Garden OJ. Does antibiotic prophylaxis at the time of catheter insertion reduce the incidence of catheter-related sepsis in intravenous nutrition? J Hosp Infect. 1985;6(4):419-25.

134. Ljungman P, Hägglund H, Björkstrand B, Lönnqvist B, Ringdén O. Peroperative teicoplanin for prevention of gram-positive infections in neutropenic patients with indwelling central venous catheters: a randomized, controlled study. Support Care Cancer. 1997;5(6):485-8.

135. Ranson MR, Oppenheim BA, Jackson A, Kamthan AG, Scarffe JH. Double-blind placebo controlled study of vancomycin prophylaxis for central venous catheter insertion in cancer patients. J Hosp Infect. 1990;15(1):95-102.

136. van de Wetering MD, van Woensel JBM, Lawrie TA. Prophylactic antibiotics for preventing Gram positive infections associated with long-term central venous catheters in oncology patients. Cochrane Database Syst Rev. 2013;(11):CD003295.

137. Ardura MI, Lewis J, Tansmore JL, Harp PL, Dienhart MC, Balint JP. Central catheter-associated bloodstream infection reduction with ethanol lock prophylaxis in pediatric intestinal failure: broadening quality improvement initiatives from hospital to home. JAMA Pediatr. 2015;169(4):324-31.

138. Carratalà J. Role of antibiotic prophylaxis for the prevention of intravascular catheter-related infection. Clin Microbiol Infect. 2001;7 Suppl 4:83-90.

139. Recommendations for Preventing the Spread of Vancomycin Resistance Recommendations of the Hospital Infection Control Practices Advisory Committee (HICPAC) [Internet]. [citado 31 de enero de 2019]. Disponible en: https://www.cdc.gov/mmwr/preview/mmwrhtml/00039349.htm

140. Homer-Vanniasinkam S. Surgical site and vascular infections: treatment and prophylaxis. Int J Infect Dis. 2007;11 Suppl 1:S17-22.

141. Zibari GB, Gadallah MF, Landreneau M, McMillan R, Bridges RM, Costley K, et al. Preoperative vancomycin prophylaxis decreases incidence of postoperative hemodialysis vascular access infections. Am J Kidney Dis. 1997;30(3):343-8.

142. Morange-Saussier V, Giraudeau B, van der Mee N, Lermusiaux P, Quentin R. Nasal carriage of methicillin-resistant staphylococcus aureus in vascular surgery. Ann Vasc Surg. 2006;20(6):767-72.

143. Thompson M. An audit demonstrating a reduction in MRSA infection in a specialised vascular unit resulting from a change in infection control protocol. Eur J Vasc Endovasc Surg. 2006;31(6):609-15.

144. Naylor AR, Payne D, London NJM, Thompson MM, Dennis MS, Sayers RD, et al. Prosthetic patch infection after carotid endarterectomy. Eur J Vasc Endovasc Surg. 2002;23(1):11-6.

145. Richet HM, Chidiac C, Prat A, Pol A, David M, Maccario M, et al. Analysis of risk factors for surgical wound infections following vascular surgery. Am J Med. 1991;91(3B):170S-172S.

146. Venkatesan AM, Kundu S, Sacks D, Wallace MJ, Wojak JC, Rose SC, et al. Practice guidelines for adult antibiotic prophylaxis during vascular and interventional radiology procedures. Written by the Standards of Practice Committee for the Society of Interventional Radiology and Endorsed by the Cardiovascular Interventional Radiological Society of Europe and Canadian Interventional Radiology Association [corrected]. J Vasc Interv Radiol. 2010;21(11):1611-30; quiz 1631.

147. Stewart AH, Eyers PS, Earnshaw JJ. Prevention of infection in peripheral arterial reconstruction: a systematic review and meta-analysis. J Vasc Surg. 2007;46(1):148-55.

148. Edwards WH, Kaiser AB, Kernodle DS, Appleby TC, Edwards WH, Martin RS, et al. Cefuroxime versus cefazolin as prophylaxis in vascular surgery. J Vasc Surg. 1992;15(1):35-41; discussion 41-42.

149. Hasselgren PO, Ivarsson L, Risberg B, Seeman T. Effects of prophylactic antibiotics in vascular surgery. A prospective, randomized, double-blind study. Ann Surg. 1984;200(1):86-92.

150. Earnshaw JJ, Slack RC, Hopkinson BR, Makin GS. Risk factors in vascular surgical sepsis. Ann R Coll Surg Engl. 1988;70(3):139-43.

151. Bratzler DW, Dellinger EP, Olsen KM, Perl TM, Auwaerter PG, Bolon MK, et al. Clinical practice guidelines for antimicrobial prophylaxis in surgery. Am J Health Syst Pharm. 2013;70(3):195-283.

152. Asencio MA, Huertas M, Carranza R, Tenías JM, Celis J, González-Del Valle F. [Microbiological study of infectious endophthalmitis with positive culture within a 13 year-period]. Rev Esp Quimioter. 2014;27(1):22-7.

153. Endophthalmitis Study Group, European Society of Cataract & Refractive Surgeons. Prophylaxis of postoperative endophthalmitis following cataract surgery: results of the ESCRS multicenter study and identification of risk factors. J Cataract Refract Surg. 2007;33(6):978-88.

154. Cao H, Zhang L, Li L, Lo S. Risk factors for acute endophthalmitis following cataract surgery: a systematic review and meta-analysis. PLoS ONE. 2013;8(8):e71731.

155. Sobaci G, Tuncer K, Taş A, Ozyurt M, Bayer A, Kutlu U. The effect of intraoperative antibiotics in irrigating solutions on aqueous humor contamination and endophthalmitis after phacoemulsification surgery. Eur J Ophthalmol. 2003;13(9-10):773-8.

156. Kessel L, Flesner P, Andresen J, Erngaard D, Tendal B, Hjortdal J. Antibiotic prevention of postcataract endophthalmitis: a systematic review and meta-analysis. Acta Ophthalmol. 2015;93(4):303-17.

157. Romero-Aroca P, Méndez-Marin I, Salvat-Serra M, Fernández-Ballart J, Almena-Garcia M, Reyes-Torres J. Results at seven years after the use of intracamerular cefazolin as an endophthalmitis prophylaxis in cataract surgery. BMC Ophthalmol. 2012;12:2.

158. Garat M, Moser CL, Martín-Baranera M, Alonso-Tarrés C, Alvarez-Rubio L. Prophylactic intracameral cefazolin after cataract surgery: endophthalmitis risk reduction and safety results in a 6-year study. J Cataract Refract Surg. 2009;35(4):637-42.

159. Li B, Miño de Kaspar H, Haritoglou C, Kook D, Kampik A, Sheng M, et al. Comparison of 1-day versus 1-hour application of topical neomycin/polymyxin-B before cataract surgery. J Cataract Refract Surg. 2015;41(4):724-31.

160. Linertová R, Abreu-González R, García-Pérez L, Alonso-Plasencia M, Cordovés-Dorta LM, Abreu-Reyes JA, et al. Intracameral cefuroxime and moxifloxacin used as endophthalmitis prophylaxis after cataract surgery: systematic review of effectiveness and cost-effectiveness. Clin Ophthalmol. 2014;8:1515-22.

161. Rudnisky CJ, Wan D, Weis E. Antibiotic choice for the prophylaxis of post-cataract extraction endophthalmitis. Ophthalmology. 2014;121(4):835-41.

162. Gower EW, Lindsley K, Nanji AA, Leyngold I, McDonnell PJ. Perioperative antibiotics for prevention of acute endophthalmitis after cataract surgery. Cochrane Database Syst Rev. 2013;(7):CD006364.

163. Lam PTH, Young AL, Cheng LL, Tam PMK, Lee VYW. Randomized controlled trial on the safety of intracameral cephalosporins in cataract surgery. Clin Ophthalmol. 2010;4:1499-504.

164. Vardy SJ, Rose GE. Prevention of cellulitis after open lacrimal surgery: a prospective study of three methods. Ophthalmology. 2000;107(2):315-7.

165. Soheilian M, Rafati N, Mohebbi M-R, Yazdani S, Habibabadi HF, Feghhi M, et al. Prophylaxis of acute posttraumatic bacterial endophthalmitis: a multicenter, randomized clinical trial of intraocular antibiotic injection, report 2. Arch Ophthalmol. 2007;125(4):460-5.

166. Ahmed Y, Schimel AM, Pathengay A, Colyer MH, Flynn HW. Endophthalmitis following open-globe injuries. Eye (Lond). 2012;26(2):212-7.

167. Thevi T, Abas AL. Role of intravitreal/intracameral antibiotics to prevent traumatic endophthalmitis - Meta-analysis. Indian J Ophthalmol. 2017;65(10):920-5.

168. Abouammoh MA, Al-Mousa A, Gogandi M, Al-Mezaine H, Osman E, Alsharidah AM, et al. Prophylactic intravitreal antibiotics reduce the risk of post-traumatic endophthalmitis after repair of open globe injuries. Acta Ophthalmol. 2018;96(3):e361-5.

169. López-Cabezas C, Muner DS, Massa MR, Mensa Pueyo JM. Antibiotics in endophthalmitis: microbiological and pharmacokinetic considerations. Curr Clin Pharmacol. 2010;5(1):47-54.

170. Barker FG. Efficacy of prophylactic antibiotics against meningitis after craniotomy: a meta-analysis. Neurosurgery. 2007;60(5):887-94; discussion 887-894.

171. Alotaibi AF, Hulou MM, Vestal M, Alkholifi F, Asgarzadeh M, Cote DJ, et al. The Efficacy of Antibacterial Prophylaxis Against the Development of Meningitis After Craniotomy: A Meta-Analysis. World Neurosurg. 2016;90:597-603.e1.

172. Gaillard T, Gilsbach JM. Intra-operative antibiotic prophylaxis in neurosurgery. A prospective, randomized, controlled study on cefotiam. Acta Neurochir (Wien). 1991;113(3-4):103-9.

173. Holloway KL, Smith KW, Wilberger JE, Jemsek JG, Giguere GC, Collins JJ. Antibiotic prophylaxis during clean neurosurgery: a large, multicenter study using cefuroxime. Clin Ther. 1996;18(1):84-94.

174. Whitby M, Johnson BC, Atkinson RL, Stuart G. The comparative efficacy of intravenous cefotaxime and trimethoprim/sulfamethoxazole in preventing infection after neurosurgery: a prospective, randomized study. Brisbane Neurosurgical Infection Group. Br J Neurosurg. 2000;14(1):13-8.

175. Korinek A-M, Baugnon T, Golmard J-L, van Effenterre R, Coriat P, Puybasset L. Risk Factors for Adult Nosocomial Meningitis after Craniotomy Role of Antibiotic Prophylaxis. Neurosurgery. 2006;59(1):126-33.

176. Liu W, Neidert MC, Groen RJM, Woernle CM, Grundmann H. Third-generation cephalosporins as antibiotic prophylaxis in neurosurgery: what’s the evidence? Clin Neurol Neurosurg. 2014;116:13-9.

177. Abraham P, Lamba N, Acosta M, Gholmie J, Dawood HY, Vestal M, et al. Antibacterial prophylaxis for gram-positive and gram-negative infections in cranial surgery: A meta-analysis. J Clin Neurosci. 2017;45:24-32.

178. Langley JM, LeBlanc JC, Drake J, Milner R. Efficacy of antimicrobial prophylaxis in placement of cerebrospinal fluid shunts: meta-analysis. Clin Infect Dis. 1993;17(1):98-103.

179. Haines SJ, Walters BC. Antibiotic prophylaxis for cerebrospinal fluid shunts: a metanalysis. Neurosurgery. 1994;34(1):87-92.

180. Ratilal B, Costa J, Sampaio C. Antibiotic prophylaxis for surgical introduction of intracranial ventricular shunts: a systematic review. J Neurosurg Pediatr. 2008;1(1):48-56.

181. Tacconelli E, Cataldo MA, Albanese A, Tumbarello M, Arduini E, Spanu T, et al. Vancomycin versus cefazolin prophylaxis for cerebrospinal shunt placement in a hospital with a high prevalence of meticillin-resistant *Staphylococcus aureus*. J Hosp Infect. 2008;69(4):337-44.

182. Sonabend AM, Korenfeld Y, Crisman C, Badjatia N, Mayer SA, Connolly ES. Prevention of ventriculostomy-related infections with prophylactic antibiotics and antibiotic-coated external ventricular drains: a systematic review. Neurosurgery. 2011;68(4):996-1005.

183. Alleyne CH, Hassan M, Zabramski JM. The efficacy and cost of prophylactic and perioprocedural antibiotics in patients with external ventricular drains. Neurosurgery. 2000;47(5):1124-7; discussion 1127-1129.

184. Rebuck JA, Murry KR, Rhoney DH, Michael DB, Coplin WM. Infection related to intracranial pressure monitors in adults: analysis of risk factors and antibiotic prophylaxis. J Neurol Neurosurg Psychiatry. 2000;69(3):381-4.

185. Flibotte JJ, Lee KE, Koroshetz WJ, Rosand J, McDonald CT. Continuous antibiotic prophylaxis and cerebral spinal fluid infection in patients with intracranial pressure monitors. Neurocrit Care. 2004;1(1):61-8.

186. May AK, Fleming SB, Carpenter RO, Diaz JJ, Guillamondegui OD, Deppen SA, et al. Influence of broad-spectrum antibiotic prophylaxis on intracranial pressure monitor infections and subsequent infectious complications in head-injured patients. Surg Infect (Larchmt). 2006;7(5):409-17.

187. Stoikes NF, Magnotti LJ, Hodges TM, Weinberg JA, Schroeppel TJ, Savage SA, et al. Impact of intracranial pressure monitor prophylaxis on central nervous system infections and bacterial multi-drug resistance. Surg Infect (Larchmt). 2008;9(5):503-8.

188. Jacobs DG, Westerband A. Antibiotic prophylaxis for intracranial pressure monitors. J Natl Med Assoc. 1998;90(7):417-23.

189. Prabhu VC, Kaufman HH, Voelker JL, Aronoff SC, Niewiadomska-Bugaj M, Mascaro S, et al. Prophylactic antibiotics with intracranial pressure monitors and external ventricular drains: a review of the evidence. Surg Neurol. 1999;52(3):226-36; discussion 236-237.

190. van Aken MO, de Marie S, van der Lely AJ, Singh R, van den Berge JH, Poublon RM, et al. Risk factors for meningitis after transsphenoidal surgery. Clin Infect Dis. 1997;25(4):852-6.

191. Orlando R, Cappabianca P, Tosone G, Esposito F, Piazza M, de Divitiis E. Retrospective analysis of a new antibiotic chemoprophylaxis regimen in 170 patients undergoing endoscopic endonasal transsphenoidal surgery. Surg Neurol. 2007;68(2):145-8; discussion 148.

192. Brown SM, Anand VK, Tabaee A, Schwartz TH. Role of perioperative antibiotics in endoscopic skull base surgery. Laryngoscope. 2007;117(9):1528-32.

193. Little AS, White WL. Short-duration, single-agent antibiotic prophylaxis for meningitis in trans-sphenoidal surgery. Pituitary. 2011;14(4):335-9.

194. Somma T, Maraolo AE, Esposito F, Cavallo LM, Tosone G, Orlando R, et al. Efficacy of ultra-short single agent regimen antibiotic chemo-prophylaxis in reducing the risk of meningitis in patients undergoing endoscopic endonasal transsphenoidal surgery. Clin Neurol Neurosurg. 2015;139:206-9.

195. Pons VG, Denlinger SL, Guglielmo BJ, Octavio J, Flaherty J, Derish PA, et al. Ceftizoxime versus vancomycin and gentamicin in neurosurgical prophylaxis: a randomized, prospective, blinded clinical study. Neurosurgery. 1993;33(3):416-22; discussion 422-423.

196. Pagliano P, Caggiano C, Ascione T, Solari D, Di Flumeri G, Cavallo LM, et al. Characteristics of meningitis following transsphenoidal endoscopic surgery: a case series and a systematic literature review. Infection. 2017;45(6):841-8.

197. Johnson JT, Wagner RL. Infection following uncontaminated head and neck surgery. Arch Otolaryngol Head Neck Surg. 1987;113(4):368-9.

198. Avenia N, Sanguinetti A, Cirocchi R, Docimo G, Ragusa M, Ruggiero R, et al. Antibiotic prophylaxis in thyroid surgery: a preliminary multicentric Italian experience. Ann Surg Innov Res. 2009;3:10.

199. Uruno T, Masaki C, Suzuki A, Ohkuwa K, Shibuya H, Kitagawa W, et al. Antimicrobial prophylaxis for the prevention of surgical site infection after thyroid and parathyroid surgery: a prospective randomized trial. World J Surg. 2015;39(5):1282-7.

200. Fachinetti A, Chiappa C, Arlant V, Kim HY, Liu X, Sun H, et al. Antibiotic prophylaxis in thyroid surgery. Gland Surg. 2017;6(5):525-9.

201. Simo R, French G. The use of prophylactic antibiotics in head and neck oncological surgery. Curr Opin Otolaryngol Head Neck Surg. 2006;14(2):55-61.

202. Seven H, Sayin I, Turgut S. Antibiotic prophylaxis in clean neck dissections. J Laryngol Otol. 2004;118(3):213-6.

203. Carrau RL, Byzakis J, Wagner RL, Johnson JT. Role of prophylactic antibiotics in uncontaminated neck dissections. Arch Otolaryngol Head Neck Surg. 1991;117(2):194-5.

204. Man L-X, Beswick DM, Johnson JT. Antibiotic prophylaxis in uncontaminated neck dissection. Laryngoscope. 2011;121(7):1473-7.

205. Slattery WH, Stringer SP, Cassisi NJ. Prophylactic antibiotic use in clean, uncontaminated neck dissection. Laryngoscope. 1995;105(3 Pt 1):244-6.

206. Mustafa E, Tahsin A. Cefotaxime prophylaxis in major non-contaminated head and neck surgery: one-day vs. seven-day therapy. J Laryngol Otol. 1993;107(1):30-2.

207. O’Reilly BJ, Black S, Fernandes J, Panesar J. Is the routine use of antibiotics justified in adult tonsillectomy? J Laryngol Otol. 2003;117(5):382-5.

208. Lee WC, Duignan MC, Walsh RM, McRae-Moore JR. An audit of prophylactic antibiotic treatment following tonsillectomy in children. J Laryngol Otol. 1996;110(4):357-9.

209. Caniello M, Passerotti GH, Goto EY, Voegels RL, Butugan O. Antibiotics in septoplasty: is it necessary? Braz J Otorhinolaryngol. 2005;71(6):734-8.

210. Dhiwakar M, Clement WA, Supriya M, McKerrow W. Antibiotics to reduce post-tonsillectomy morbidity. Cochrane Database Syst Rev. 2012;12:CD005607.

211. Dhiwakar M, Eng CY, Selvaraj S, McKerrow WS. Antibiotics to improve recovery following tonsillectomy: a systematic review. Otolaryngol Head Neck Surg. 2006;134(3):357-64.

212. Becker GD, Parell GJ. Cefazolin prophylaxis in head and neck cancer surgery. Ann Otol Rhinol Laryngol. 1979;88(2 Pt 1):183-6.

213. Vila PM, Zenga J, Jackson RS. Antibiotic Prophylaxis in Clean-Contaminated Head and Neck Surgery: A Systematic Review and Meta-analysis. Otolaryngol Head Neck Surg. 2017;157(4):580-8.

214. Haidar YM, Tripathi PB, Tjoa T, Walia S, Zhang L, Chen Y, et al. Antibiotic prophylaxis in clean-contaminated head and neck cases with microvascular free flap reconstruction: A systematic review and meta-analysis. Head Neck. 2018;40(2):417-27.

215. Murphy J, Isaiah A, Dyalram D, Lubek JE. Surgical Site Infections in Patients Receiving Osteomyocutaneous Free Flaps to the Head and Neck. Does Choice of Antibiotic Prophylaxis Matter? J Oral Maxillofac Surg. 2017;75(10):2223-9.

216. Wagner JL, Kenney RM, Vazquez JA, Ghanem TA, Davis SL. Surgical prophylaxis with gram-negative activity for reduction of surgical site infections after microvascular reconstruction for head and neck cancer. Head Neck. 2016;38(10):1449-54.

217. Saleh AM, Torres KM, Murad MH, Erwin PJ, Driscoll CLW. Prophylactic perioperative antibiotic use in endoscopic sinus surgery: a systematic review and meta-analysis. Otolaryngol Head Neck Surg. 2012;146(4):533-8.

218. Patel PN, Jayawardena ADL, Walden RL, Penn EB, Francis DO. Evidence-Based Use of Perioperative Antibiotics in Otolaryngology. Otolaryngol Head Neck Surg. 2018;158(5):783-800.

219. Govaerts PJ, Raemaekers J, Verlinden A, Kalai M, Somers T, Offeciers FE. Use of antibiotic prophylaxis in ear surgery. Laryngoscope. 1998;108(1 Pt 1):107-10.

220. Pierce NE, Antonelli PJ. Efficacy of antibiotic prophylaxis prior to tympanoplasty for contaminated cholesteatoma. Laryngoscope. 2016;126(10):2363-6.

221. Hochman J, Blakley B, Abdoh A, Aleid H. Post-tympanostomy tube otorrhea: a meta-analysis. Otolaryngol Head Neck Surg. 2006;135(1):8-11.

222. Anne S, Ishman SL, Schwartz S. A Systematic Review of Perioperative Versus Prophylactic Antibiotics for Cochlear Implantation. Ann Otol Rhinol Laryngol. 2016;125(11):893-9.

223. Basavaraj S, Najaraj S, Shanks M, Wardrop P, Allen AA. Short-term versus long-term antibiotic prophylaxis in cochlear implant surgery. Otol Neurotol. 2004;25(5):720-2.

224. Hirsch BE, Blikas A, Whitaker M. Antibiotic prophylaxis in cochlear implant surgery. Laryngoscope. 2007;117(5):864-7.

225. Almosnino G, Zeitler DM, Schwartz SR. Postoperative Antibiotics Following Cochlear Implantation: Are They Necessary? Ann Otol Rhinol Laryngol. 2018;127(4):266-9.

226. Schäfer J, Pirsig W. [Preventive antibiotic administration in complicated rhinosurgical interventions--a double-blind study]. Laryngol Rhinol Otol (Stuttg). 1988;67(4):150-5.

227. Andrews PJ, East CA, Jayaraj SM, Badia L, Panagamuwa C, Harding L. Prophylactic vs postoperative antibiotic use in complex septorhinoplasty surgery: a prospective, randomized, single-blind trial comparing efficacy. Arch Facial Plast Surg. 2006;8(2):84-7.

228. Rajan GP, Fergie N, Fischer U, Romer M, Radivojevic V, Hee GK. Antibiotic prophylaxis in septorhinoplasty? A prospective, randomized study. Plast Reconstr Surg. 2005;116(7):1995-8.

229. Lange JL, Peeden EH, Stringer SP. Are prophylactic systemic antibiotics necessary with nasal packing? A systematic review. Am J Rhinol Allergy. 2017;31(4):240-7.

230. Kyzas PA. Use of antibiotics in the treatment of mandible fractures: a systematic review. J Oral Maxillofac Surg. 2011;69(4):1129-45.

231. Andreasen JO, Jensen SS, Schwartz O, Hillerup Y. A systematic review of prophylactic antibiotics in the surgical treatment of maxillofacial fractures. J Oral Maxillofac Surg. 2006;64(11):1664-8.

232. Habib AM, Wong AD, Schreiner GC, Satti KF, Riblet NB, Johnson HA, et al. Postoperative prophylactic antibiotics for facial fractures: A systematic review and meta-analysis. Laryngoscope. 2019;129(1):82-95.

233. Lodi G, Figini L, Sardella A, Carrassi A, Del Fabbro M, Furness S. Antibiotics to prevent complications following tooth extractions. Cochrane Database Syst Rev. 2012;11:CD003811.

234. Arteagoitia M-I, Barbier L, Santamaría J, Santamaría G, Ramos E. Efficacy of amoxicillin and amoxicillin/clavulanic acid in the prevention of infection and dry socket after third molar extraction. A systematic review and meta-analysis. Med Oral Patol Oral Cir Bucal. 2016;21(4):e494-504.

235. Taberner-Vallverdú M, Sánchez-Garcés M-Á, Gay-Escoda C. Efficacy of different methods used for dry socket prevention and risk factor analysis: A systematic review. Med Oral Patol Oral Cir Bucal. 2017;22(6):e750-8.

236. Tarakji B, Saleh LA, Umair A, Azzeghaiby SN, Hanouneh S. Systemic review of dry socket: aetiology, treatment, and prevention. J Clin Diagn Res. 2015;9(4):ZE10-13.

237. Esposito M, Grusovin MG, Worthington HV. Interventions for replacing missing teeth: antibiotics at dental implant placement to prevent complications. Cochrane Database Syst Rev. 2013;(7):CD004152.

238. Lindeboom JAH, van den Akker HP. A prospective placebo-controlled double-blind trial of antibiotic prophylaxis in intraoral bone grafting procedures: a pilot study. Oral Surg Oral Med Oral Pathol Oral Radiol Endod. 2003;96(6):669-72.

239. Lindeboom JA, Frenken JW, Tuk JG, Kroon FH. A randomized prospective controlled trial of antibiotic prophylaxis in intraoral bone-grafting procedures: preoperative single-dose penicillin versus preoperative single-dose clindamycin. Int J Oral Maxillofac Surg. 2006;35(5):433-6.

240. Gallardo-Calero I, Larrainzar-Coghen T, Rodriguez-Pardo D, Pigrau C, Sánchez-Raya J, Amat C, et al. Increased infection risk after hip hemiarthroplasty in institutionalized patients with proximal femur fracture. Injury. 2016;47(4):872-6.

241. Abdul-Jabbar A, Berven SH, Hu SS, Chou D, Mummaneni PV, Takemoto S, et al. Surgical site infections in spine surgery: identification of microbiologic and surgical characteristics in 239 cases. Spine. 2013;38(22):E1425-1431.

242. Wieck JA, Jackson JK, O’Brien TJ, Lurate RB, Russell JM, Dorchak JD. Efficacy of prophylactic antibiotics in arthroscopic surgery. Orthopedics. 1997;20(2):133-4.

243. Wyatt RWB, Maletis GB, Lyon LL, Schwalbe J, Avins AL. Efficacy of Prophylactic Antibiotics in Simple Knee Arthroscopy. Arthroscopy. 2017;33(1):157-62.

244. Qi Y, Yang X, Pan Z, Wang H, Chen L. Value of antibiotic prophylaxis in routine knee arthroscopy : A retrospective study. Orthopade. 2018;47(3):246-53.

245. Merrer J, Desbouchages L, Serazin V, Razafimamonjy J, Pauthier F, Leneveu M. Comparison of routine prophylaxis with vancomycin or cefazolin for femoral neck fracture surgery: microbiological and clinical outcomes. Infect Control Hosp Epidemiol. 2006;27(12):1366-71.

246. Soriano A, Popescu D, García S, Bori G, Martínez JA, Balasso V, et al. Usefulness of teicoplanin for preventing methicillin-resistant Staphylococcus aureus infections in orthopedic surgery. Eur J Clin Microbiol Infect Dis. 2006;25(1):35-8.

247. Southwell-Keely JP, Russo RR, March L, Cumming R, Cameron I, Brnabic AJM. Antibiotic prophylaxis in hip fracture surgery: a metaanalysis. Clin Orthop Relat Res. 2004;(419):179-84.

248. Gillespie WJ, Walenkamp G. Antibiotic prophylaxis for surgery for proximal femoral and other closed long bone fractures. Cochrane Database Syst Rev. 2001;(1):CD000244.

249. Westberg M, Frihagen F, Brun O-C, Figved W, Grøgaard B, Valland H, et al. Effectiveness of gentamicin-containing collagen sponges for prevention of surgical site infection after hip arthroplasty: a multicenter randomized trial. Clin Infect Dis. 2015;60(12):1752-9.

250. Merrer J, Pisica-Donose G, Leneveu M, Pauthier F. Prevalence of methicillin-resistant Staphylococcus aureus nasal carriage among patients with femoral neck fractures: implication for antibiotic prophylaxis. Infect Control Hosp Epidemiol. 2004;25(6):515-7.

251. Deny A, Loiez C, Deken V, Putman S, Duhamel A, Girard J, et al. Epidemiology of patients with MSSA versus MRSA infections of orthopedic implants: Retrospective study of 115 patients. Orthop Traumatol Surg Res. 2016;102(7):919-23.

252. del Toro MD, Nieto I, Guerrero F, Corzo J, del Arco A, Palomino J, et al. Are hip hemiarthroplasty and total hip arthroplasty infections different entities? The importance of hip fractures. Eur J Clin Microbiol Infect Dis. 2014;33(8):1439-48.

253. Bosco JA, Prince Rainier R Tejada null, Catanzano AJ, Stachel AG, Phillips MS. Expanded Gram-Negative Antimicrobial Prophylaxis Reduces Surgical Site Infections in Hip Arthroplasty. J Arthroplasty. 2016;31(3):616-21.

254. Crist BD, Oladeji LO, Della Rocca GJ, Volgas DA, Stannard JP, Greenberg DD. Evaluating the Duration of Prophylactic Post-Operative Antibiotic Agents after Open Reduction Internal Fixation for Closed Fractures. Surg Infect (Larchmt). 2018;19(5):535-40.

255. Gosselin RA, Roberts I, Gillespie WJ. Antibiotics for preventing infection in open limb fractures. Cochrane Database Syst Rev. 2004;(1):CD003764.

256. Hauser CJ, Adams CA, Eachempati SR, Council of the Surgical Infection Society. Surgical Infection Society guideline: prophylactic antibiotic use in open fractures: an evidence-based guideline. Surg Infect (Larchmt). 2006;7(4):379-405.

257. Lack WD, Karunakar MA, Angerame MR, Seymour RB, Sims S, Kellam JF, et al. Type III open tibia fractures: immediate antibiotic prophylaxis minimizes infection. J Orthop Trauma. 2015;29(1):1-6.

258. Hull PD, Johnson SC, Stephen DJG, Kreder HJ, Jenkinson RJ. Delayed debridement of severe open fractures is associated with a higher rate of deep infection. Bone Joint J. 2014;96-B(3):379-84.

259. Isaac SM, Woods A, Danial IN, Mourkus H. Antibiotic Prophylaxis in Adults With Open Tibial Fractures: What Is the Evidence for Duration of Administration? A Systematic Review. J Foot Ankle Surg. 2016;55(1):146-50.

260. Redfern J, Wasilko SM, Groth ME, McMillian WD, Bartlett CS. Surgical Site Infections in Patients With Type 3 Open Fractures: Comparing Antibiotic Prophylaxis With Cefazolin Plus Gentamicin Versus Piperacillin/Tazobactam. J Orthop Trauma. 2016;30(8):415-9.

261. Saveli CC, Morgan SJ, Belknap RW, Ross E, Stahel PF, Chaus GW, et al. Prophylactic antibiotics in open fractures: a pilot randomized clinical safety study. J Orthop Trauma. 2013;27(10):552-7.

262. Ondari JN, Masika MM, Ombachi RB, Ating’a JE. Unblinded randomized control trial on prophylactic antibiotic use in gustilo II open tibia fractures at Kenyatta National Hospital, Kenya. Injury. 2016;47(10):2288-93.

263. Messner J, Papakostidis C, Giannoudis PV, Kanakaris NK. Duration of Administration of Antibiotic Agents for Open Fractures: Meta-Analysis of the Existing Evidence. Surg Infect (Larchmt). 2017;18(8):854-67.

264. Bankhead-Kendall B, Gutierrez T, Murry J, Holland D, Agrawal V, Almahmoud K, et al. Antibiotics and open fractures of the lower extremity: less is more. Eur J Trauma Emerg Surg. 2019;45(1):125-9.

265. Tessier JM, Moore B, Putty B, Gandhi RR, Duane TM. Prophylactic Gentamicin Is Not Associated with Acute Kidney Injury in Patients with Open Fractures. Surg Infect (Larchmt). 2016;17(6):720-3.

266. Lloyd BA, Murray CK, Shaikh F, Carson ML, Blyth DM, Schnaubelt ER, et al. Early infectious outcomes after addition of fluoroquinolone or aminoglycoside to posttrauma antibiotic prophylaxis in combat-related open fracture injuries. J Trauma Acute Care Surg. 2017;83(5):854-61.

267. Open Fractures of the Lower Limb | BAPRAS [Internet]. [citado 7 de febrero de 2019]. Disponible en: http://www.bapras.org.uk/professionals/clinical-guidance/open-fractures-of-the-lower-limb

268. Craig J, Fuchs T, Jenks M, Fleetwood K, Franz D, Iff J, et al. Systematic review and meta-analysis of the additional benefit of local prophylactic antibiotic therapy for infection rates in open tibia fractures treated with intramedullary nailing. Int Orthop. 2014;38(5):1025-30.

269. Morgenstern M, Vallejo A, McNally MA, Moriarty TF, Ferguson JY, Nijs S, et al. The effect of local antibiotic prophylaxis when treating open limb fractures: A systematic review and meta-analysis. Bone Joint Res. 2018;7(7):447-56.

270. Backes M, Dingemans SA, Dijkgraaf MGW, van den Berg HR, van Dijkman B, Hoogendoorn JM, et al. Effect of Antibiotic Prophylaxis on Surgical Site Infections Following Removal of Orthopedic Implants Used for Treatment of Foot, Ankle, and Lower Leg Fractures: A Randomized Clinical Trial. JAMA. 2017;318(24):2438-45.

271. Glenny A, Song F. Antimicrobial prophylaxis in total hip replacement: a systematic review. Health Technol Assess. 1999;3(21):1-57.

272. AlBuhairan B, Hind D, Hutchinson A. Antibiotic prophylaxis for wound infections in total joint arthroplasty: a systematic review. J Bone Joint Surg Br. 2008;90(7):915-9.

273. Robertsson O, Thompson O, W-Dahl A, Sundberg M, Lidgren L, Stefánsdóttir A. Higher risk of revision for infection using systemic clindamycin prophylaxis than with cloxacillin. Acta Orthop. 2017;88(5):562-7.

274. Kanj WW, Flynn JM, Spiegel DA, Dormans JP, Baldwin KD. Vancomycin prophylaxis of surgical site infection in clean orthopedic surgery. Orthopedics. 2013;36(2):138-46.

275. Hawn MT, Richman JS, Vick CC, Deierhoi RJ, Graham LA, Henderson WG, et al. Timing of surgical antibiotic prophylaxis and the risk of surgical site infection. JAMA Surg. 2013;148(7):649-57.

276. Ponce B, Raines BT, Reed RD, Vick C, Richman J, Hawn M. Surgical Site Infection After Arthroplasty: Comparative Effectiveness of Prophylactic Antibiotics: Do Surgical Care Improvement Project Guidelines Need to Be Updated? J Bone Joint Surg Am. 2014;96(12):970-7.

277. Tornero E, García-Ramiro S, Martínez-Pastor JC, Bori G, Bosch J, Morata L, et al. Prophylaxis with teicoplanin and cefuroxime reduces the rate of prosthetic joint infection after primary arthroplasty. Antimicrob Agents Chemother. 2015;59(2):831-7.

278. Sewick A, Makani A, Wu C, O’Donnell J, Baldwin KD, Lee G-C. Does dual antibiotic prophylaxis better prevent surgical site infections in total joint arthroplasty? Clin Orthop Relat Res. 2012;470(10):2702-7.

279. Tucker A, Hegarty P, Magill PJ, Blaney J, Armstrong LV, McCaffrey JE, et al. Acute Kidney Injury After Prophylactic Cefuroxime and Gentamicin in Patients Undergoing Primary Hip and Knee Arthroplasty-A Propensity Score-Matched Study. J Arthroplasty. 2018;33(9):3009-15.

280. Tang WM, Chiu KY, Ng TP, Yau WP, Ching PTY, Seto WH. Efficacy of a single dose of cefazolin as a prophylactic antibiotic in primary arthroplasty. J Arthroplasty. 2003;18(6):714-8.

281. Aboltins CA, Berdal JE, Casas F, Corona PS, Cuellar D, Ferrari MC, et al. Hip and Knee Section, Prevention, Antimicrobials (Systemic): Proceedings of International Consensus on Orthopedic Infections. J Arthroplasty. 2019;34(2S):S279-88.

282. Siddiqi A, Forte SA, Docter S, Bryant D, Sheth NP, Chen AF. Perioperative Antibiotic Prophylaxis in Total Joint Arthroplasty: A Systematic Review and Meta-Analysis. J Bone Joint Surg Am. 2019;101(9):828-42.

283. Claret G, Tornero E, Martínez-Pastor J-C, Piazuelo M, Martínez J, Bosch J, et al. A Prolonged Post-Operative Antibiotic Regimen Reduced the Rate of Prosthetic Joint Infection after Aseptic Revision Knee Arthroplasty. Surg Infect (Larchmt). 2015;16(6):775-80.

284. Racano A, Pazionis T, Farrokhyar F, Deheshi B, Ghert M. High infection rate outcomes in long-bone tumor surgery with endoprosthetic reconstruction in adults: a systematic review. Clin Orthop Relat Res. 2013;471(6):2017-27.

285. Hettwer WH, Horstmann PF, Hovgaard TB, Grum-Scwensen TA, Petersen MM. Low infection rate after tumor hip arthroplasty for metastatic bone disease in a cohort treated with extended antibiotic prophylaxis. Adv Orthop. 2015;2015:428986.

286. Wang J, Zhu C, Cheng T, Peng X, Zhang W, Qin H, et al. A systematic review and meta-analysis of antibiotic-impregnated bone cement use in primary total hip or knee arthroplasty. PLoS ONE. 2013;8(12):e82745.

287. Barker FG. Efficacy of prophylactic antibiotic therapy in spinal surgery: a meta-analysis. Neurosurgery. 2002;51(2):391-400; discussion 400-401.

288. Petignat C, Francioli P, Harbarth S, Regli L, Porchet F, Reverdin A, et al. Cefuroxime prophylaxis is effective in noninstrumented spine surgery: a double-blind, placebo-controlled study. Spine. 2008;33(18):1919-24.

289. Takemoto RC, Lonner B, Andres T, Park J, Ricart-Hoffiz P, Bendo J, et al. Appropriateness of Twenty-four-Hour Antibiotic Prophylaxis After Spinal Surgery in Which a Drain Is Utilized: A Prospective Randomized Study. J Bone Joint Surg Am. 2015;97(12):979-86.

290. Jacob Júnior C, de Assis AC, Guimarães RG, Barbosa IM, Batista Júnior JL. Postoperative comparison of the results from use of antibiotic prophylaxis for one and five days among patients undergoing lumbar arthrodesis. Rev Bras Ortop. 2016;51(3):333-6.

291. Kamath VHD, Cheung JPY, Mak KC, Wong YW, Cheung WY, Luk KDK, et al. Antimicrobial prophylaxis to prevent surgical site infection in adolescent idiopathic scoliosis patients undergoing posterior spinal fusion: 2 doses versus antibiotics till drain removal. Eur Spine J. 2016;25(10):3242-8.

292. Marimuthu C, Abraham VT, Ravichandran M, Achimuthu R. Antimicrobial Prophylaxis in Instrumented Spinal Fusion Surgery: A Comparative Analysis of 24-Hour and 72-Hour Dosages. Asian Spine J. 2016;10(6):1018-22.

293. Lewis A, Lin J, James H, Krok AC, Zeoli N, Healy J, et al. A single-center intervention to discontinue postoperative antibiotics after spinal fusion. Br J Neurosurg. 2018;32(2):177-81.

294. Dobzyniak MA, Fischgrund JS, Hankins S, Herkowitz HN. Single versus multiple dose antibiotic prophylaxis in lumbar disc surgery. Spine. 2003;28(21):E453-455.

295. Hellbusch LC, Helzer-Julin M, Doran SE, Leibrock LG, Long DJ, Puccioni MJ, et al. Single-dose vs multiple-dose antibiotic prophylaxis in instrumented lumbar fusion--a prospective study. Surg Neurol. 2008;70(6):622-7; discussion 627.

296. Núñez-Pereira S, Pellisé F, Rodríguez-Pardo D, Pigrau C, Sánchez JM, Bagó J, et al. Individualized antibiotic prophylaxis reduces surgical site infections by gram-negative bacteria in instrumented spinal surgery. Eur Spine J. 2011;20 Suppl 3:397-402.

297. Bakhsheshian J, Dahdaleh NS, Lam SK, Savage JW, Smith ZA. The use of vancomycin powder in modern spine surgery: systematic review and meta-analysis of the clinical evidence. World Neurosurg. 2015;83(5):816-23.

298. McIntosh J, Earnshaw JJ. Antibiotic prophylaxis for the prevention of infection after major limb amputation. Eur J Vasc Endovasc Surg. 2009;37(6):696-703.

299. Sadat U, Chaudhuri A, Hayes PD, Gaunt ME, Boyle JR, Varty K. Five day antibiotic prophylaxis for major lower limb amputation reduces wound infection rates and the length of in-hospital stay. Eur J Vasc Endovasc Surg. 2008;35(1):75-8.

300. Lipsky BA, Berendt AR, Cornia PB, Pile JC, Peters EJG, Armstrong DG, et al. 2012 Infectious Diseases Society of America clinical practice guideline for the diagnosis and treatment of diabetic foot infections. Clin Infect Dis. 2012;54(12):e132-173.

301. Aznar R, Mateu M, Miró JM, Gatell JM, Gimferrer JM, Aznar E, et al. Antibiotic prophylaxis in non-cardiac thoracic surgery: cefazolin versus placebo. Eur J Cardiothorac Surg. 1991;5(10):515-8.

302. Frey DJ, Reichmann AK, Mauch H, Kaiser D. ["Single-shot" antibiotic prophylaxis in thoracic surgery; reduction of the postoperative infection rate]. Infection. 1993;21 Suppl 1:S35-44.

303. Oxman DA, Issa NC, Marty FM, Patel A, Panizales CZ, Johnson NN, et al. Postoperative antibacterial prophylaxis for the prevention of infectious complications associated with tube thoracostomy in patients undergoing elective general thoracic surgery: a double-blind, placebo-controlled, randomized trial. JAMA Surg. 2013;148(5):440-6.

304. Grigorescu D, Maghiar A. Efficacy of antibiotic prophylaxis for preventing intrathoracic infections, after thoracostomy, for traumatic haemo/pneumothorax - experience of Oradea county emergency hospital. Rev Med Chir Soc Med Nat Iasi. 2012;116(4):1157-61.

305. Maxwell RA, Campbell DJ, Fabian TC, Croce MA, Luchette FA, Kerwin AJ, et al. Use of presumptive antibiotics following tube thoracostomy for traumatic hemopneumothorax in the prevention of empyema and pneumonia--a multi-center trial. J Trauma. 2004;57(4):742-8; discussion 748-749.

306. Heydari MB, Hessami MA, Setayeshi K, Sajadifar F. Use of prophylactic antibiotics following tube thoracostomy for blunt chest trauma in the prevention of empyema and pneumonia. J Inj Violence Res. 2014;6(2):91-2.

307. Sanabria A, Valdivieso E, Gomez G, Echeverry G. Prophylactic antibiotics in chest trauma: a meta-analysis of high-quality studies. World J Surg. 2006;30(10):1843-7.

308. Bosman A, de Jong MB, Debeij J, van den Broek PJ, Schipper IB. Systematic review and meta-analysis of antibiotic prophylaxis to prevent infections from chest drains in blunt and penetrating thoracic injuries. Br J Surg. 2012;99(4):506-13.

309. Nichols RL, Webb WR, Jones JW, Smith JW, LoCicero J. Efficacy of antibiotic prophylaxis in high risk gastroduodenal operations. Am J Surg. 1982;143(1):94-8.

310. Lewis RT, Allan CM, Goodall RG, Marien B, Park M, Lloyd-Smith W, et al. Cefamandole in gastroduodenal surgery: a controlled, prospective, randomized, double-blind study. Can J Surg. 1982;25(5):561-3.

311. Ise Y, Hagiwara K, Onda M, Kamei M, Katayama S, Nishizawa K, et al. Pharmaceutical cost comparison analysis of antimicrobial use for surgical prophylaxis on gastrectomy patients in a tertiary care hospital. Chemotherapy. 2005;51(6):384-6.

312. Aberg C, Thore M. Single versus triple dose antimicrobial prophylaxis in elective abdominal surgery and the impact on bacterial ecology. J Hosp Infect. 1991;18(2):149-54.

313. Mohri Y, Tonouchi H, Kobayashi M, Nakai K, Kusunoki M, Mie Surgical Infection Research Group. Randomized clinical trial of single- versus multiple-dose antimicrobial prophylaxis in gastric cancer surgery. Br J Surg. 2007;94(6):683-8.

314. Haga N, Ishida H, Ishiguro T, Kumamoto K, Ishibashi K, Tsuji Y, et al. A prospective randomized study to assess the optimal duration of intravenous antimicrobial prophylaxis in elective gastric cancer surgery. Int Surg. 2012;97(2):169-76.

315. Takagane A, Mohri Y, Konishi T, Fukushima R, Noie T, Sueyoshi S, et al. Randomized clinical trial of 24 versus 72 h antimicrobial prophylaxis in patients undergoing open total gastrectomy for gastric cancer. Br J Surg. 2017;104(2):e158-64.

316. Jafri NS, Mahid SS, Minor KS, Idstein SR, Hornung CA, Galandiuk S. Meta-analysis: antibiotic prophylaxis to prevent peristomal infection following percutaneous endoscopic gastrostomy. Aliment Pharmacol Ther. 2007;25(6):647-56.

317. Sharma VK, Howden CW. Meta-analysis of randomized, controlled trials of antibiotic prophylaxis before percutaneous endoscopic gastrostomy. Am J Gastroenterol. 2000;95(11):3133-6.

318. Saadeddin A, Freshwater DA, Fisher NC, Jones BJM. Antibiotic prophylaxis for percutaneous endoscopic gastrostomy for non-malignant conditions: a double-blind prospective randomized controlled trial. Aliment Pharmacol Ther. 2005;22(6):565-70.

319. Ahmad I, Mouncher A, Abdoolah A, Stenson R, Wright J, Daniels A, et al. Antibiotic prophylaxis for percutaneous endoscopic gastrostomy--a prospective, randomised, double-blind trial. Aliment Pharmacol Ther. 2003;18(2):209-15.

320. Dormann AJ, Wigginghaus B, Risius H, Kleimann F, Kloppenborg A, Rosemann J, et al. Antibiotic prophylaxis in percutaneous endoscopic gastrostomy (PEG)--results from a prospective randomized multicenter trial. Z Gastroenterol. 2000;38(3):229-34.

321. Preclik G, Grüne S, Leser HG, Lebherz J, Heldwein W, Machka K, et al. Prospective, randomised, double blind trial of prophylaxis with single dose of co-amoxiclav before percutaneous endoscopic gastrostomy. BMJ. 1999;319(7214):881-4.

322. Panigrahi H, Shreeve DR, Tan WC, Prudham R, Kaufman R. Role of antibiotic prophylaxis for wound infection in percutaneous endoscopic gastrostomy (PEG): result of a prospective double-blind randomized trial. J Hosp Infect. 2002;50(4):312-5.

323. Radhakrishnan NV, Shenoy AH, Cartmill I, Sharma RK, George R, Foster DN, et al. Addition of local antiseptic spray to parenteral antibiotic regimen reduces the incidence of stomal infection following percutaneous endoscopic gastrostomy: A randomized controlled trial. Eur J Gastroenterol Hepatol. 2006;18(12):1279-84.

324. Adachi Y, Akino K, Mita H, Kikuchi T, Yamashita K, Sasaki Y, et al. Systemic Prophylactic Antibiotics for the Modified Introducer Method for Percutaneous Endoscopic Gastrostomy: A Prospective, Randomized, Double-Blind Study. J Clin Gastroenterol. 2016;50(9):727-32.

325. Shastri YM, Hoepffner N, Tessmer A, Ackermann H, Schroeder O, Stein J. New introducer PEG gastropexy does not require prophylactic antibiotics: multicenter prospective randomized double-blind placebo-controlled study. Gastrointest Endosc. 2008;67(4):620-8.

326. Pories WJ, van Rij AM, Burlingham BT, Fulghum RS, Meelheim D. Prophylactic cefazolin in gastric bypass surgery. Surgery. 1981;90(2):426-32.

327. Chopra T, Marchaim D, Lynch Y, Kosmidis C, Zhao JJ, Dhar S, et al. Epidemiology and outcomes associated with surgical site infection following bariatric surgery. Am J Infect Control. 2012;40(9):815-9.

328. Freeman JT, Anderson DJ, Hartwig MG, Sexton DJ. Surgical site infections following bariatric surgery in community hospitals: a weighty concern? Obes Surg. 2011;21(7):836-40.

329. Ferraz ÁAB, Siqueira LT de, Campos JM, Araújo GC de, Martins Filho ED, Ferraz EM. ANTIBIOTIC PROPHYLAXIS IN BARIATRIC SURGERY: a continuous infusion of cefazolin versus ampicillin/sulbactam and ertapenem. Arq Gastroenterol. 2015;52(2):83-7.

330. Múñez E, Ramos A, Espejo TÁ de, Vaqué J, Sánchez-Payá J, Pastor V, et al. [Microbiology of surgical site infections in abdominal tract surgery patients]. Cir Esp. 2011;89(9):606-12.

331. SIGN 104 Antibiotic prophylaxis in surgery [Internet]. [citado 29 de enero de 2019]. Disponible en: https://www.sign.ac.uk/sign-104-antibiotic-prophylaxis-in-surgery.html

332. Brand M, Grieve A. Prophylactic antibiotics for penetrating abdominal trauma. Cochrane Database Syst Rev. 2013;(11):CD007370.

333. Fullen WD, Hunt J, Altemeier WA. Prophylactic antibiotics in penetrating wounds of the abdomen. J Trauma. 1972;12(4):282-9.

334. Luchette FA, Barrie PS, Oswanski MF, Spain DA, Mullins CD, Palumbo F, et al. Practice Management Guidelines for Prophylactic Antibiotic Use in Tube Thoracostomy for Traumatic Hemopneumothorax: the EAST Practice Management Guidelines Work Group. Eastern Association for Trauma. J Trauma. 2000;48(4):753-7.

335. Goldberg SR, Anand RJ, Como JJ, Dechert T, Dente C, Luchette FA, et al. Prophylactic antibiotic use in penetrating abdominal trauma: an Eastern Association for the Surgery of Trauma practice management guideline. J Trauma Acute Care Surg. 2012;73(5 Suppl 4):S321-325.

336. Hooker KD, DiPiro JT, Wynn JJ. Aminoglycoside combinations versus beta-lactams alone for penetrating abdominal trauma: a meta-analysis. J Trauma. 1991;31(8):1155-60.

337. Schnüriger B, Inaba K, Eberle BM, Wu T, Talving P, Bukur M, et al. Microbiological profile and antimicrobial susceptibility in surgical site infections following hollow viscus injury. J Gastrointest Surg. 2010;14(8):1304-10.

338. Chen C-Y, Chen Y-C, Pu H-N, Tsai C-H, Chen W-T, Lin C-H. Bacteriology of acute appendicitis and its implication for the use of prophylactic antibiotics. Surg Infect (Larchmt). 2012;13(6):383-90.

339. Andersen BR, Kallehave FL, Andersen HK. Antibiotics versus placebo for prevention of postoperative infection after appendicectomy. Cochrane Database Syst Rev. 2005;(3):CD001439.

340. Daskalakis K, Juhlin C, Påhlman L. The use of pre- or postoperative antibiotics in surgery for appendicitis: a systematic review. Scand J Surg. 2014;103(1):14-20.

341. Coakley BA, Sussman ES, Wolfson TS, Bhagavath AS, Choi JJ, Ranasinghe NE, et al. Postoperative antibiotics correlate with worse outcomes after appendectomy for nonperforated appendicitis. J Am Coll Surg. 2011;213(6):778-83.

342. van den Boom AL, de Wijkerslooth EML, van Rosmalen J, Beverdam FH, Boerma E-JG, Boermeester MA, et al. Two versus five days of antibiotics after appendectomy for complex acute appendicitis (APPIC): study protocol for a randomized controlled trial. Trials. 2018;19(1):263.

343. Yamamoto S, Fujita S, Ishiguro S, Akasu T, Moriya Y. Wound infection after a laparoscopic resection for colorectal cancer. Surg Today. 2008;38(7):618-22.

344. Chi AC, McGuire BB, Nadler RB. Modern Guidelines for Bowel Preparation and Antimicrobial Prophylaxis for Open and Laparoscopic Urologic Surgery. Urol Clin North Am. 2015;42(4):429-40.

345. Itani KMF, Jensen EH, Finn TS, Tomassini JE, Abramson MA. Effect of body mass index and ertapenem versus cefotetan prophylaxis on surgical site infection in elective colorectal surgery. Surg Infect (Larchmt). 2008;9(2):131-7.

346. Weber WP, Marti WR, Zwahlen M, Misteli H, Rosenthal R, Reck S, et al. The timing of surgical antimicrobial prophylaxis. Ann Surg. 2008;247(6):918-26.

347. Mahajan SN, Ariza-Heredia EJ, Rolston KV, Graviss LS, Feig BW, Aloia TA, et al. Perioperative antimicrobial prophylaxis for intra-abdominal surgery in patients with cancer: a retrospective study comparing ertapenem and nonertapenem antibiotics. Ann Surg Oncol. 2014;21(2):513-9.

348. Deierhoi RJ, Dawes LG, Vick C, Itani KMF, Hawn MT. Choice of intravenous antibiotic prophylaxis for colorectal surgery does matter. J Am Coll Surg. 2013;217(5):763-9.

349. Eagye KJ, Nicolau DP. Selection of prophylactic antimicrobial agent may affect incidence of infection in small bowel and colorectal surgery. Surg Infect (Larchmt). 2011;12(6):451-7.

350. Woodfield JC, Beshay N, van Rij AM. A meta-analysis of randomized, controlled trials assessing the prophylactic use of ceftriaxone. A study of wound, chest, and urinary infections. World J Surg. 2009;33(12):2538-50.

351. Hendren S, Fritze D, Banerjee M, Kubus J, Cleary RK, Englesbe MJ, et al. Antibiotic choice is independently associated with risk of surgical site infection after colectomy: a population-based cohort study. Ann Surg. 2013;257(3):469-75.

352. Leng X, Zhao Y, Qiu H, Cao Y, Zhu W, Shen J, et al. Ertapenem prophylaxis of surgical site infections in elective colorectal surgery in China: a multicentre, randomized, double-blind, active-controlled study. J Antimicrob Chemother. 2014;69(12):3379-86.

353. Itani KMF, Wilson SE, Awad SS, Jensen EH, Finn TS, Abramson MA. Ertapenem versus cefotetan prophylaxis in elective colorectal surgery. N Engl J Med. 2006;355(25):2640-51.

354. Dornfeld M, Lovely JK, Huebner M, Larson DW. Surgical Site Infection in Colorectal Surgery: A Study in Antibiotic Duration. Dis Colon Rectum. 2017;60(9):971-8.

355. Toh JWT, Phan K, Hitos K, Pathma-Nathan N, El-Khoury T, Richardson AJ, et al. Association of Mechanical Bowel Preparation and Oral Antibiotics Before Elective Colorectal Surgery With Surgical Site Infection: A Network Meta-analysis. JAMA Netw Open. 2018;1(6):e183226.

356. Toneva GD, Deierhoi RJ, Morris M, Richman J, Cannon JA, Altom LK, et al. Oral antibiotic bowel preparation reduces length of stay and readmissions after colorectal surgery. J Am Coll Surg. 2013;216(4):756-62; discussion 762-763.

357. Morris MS, Graham LA, Chu DI, Cannon JA, Hawn MT. Oral Antibiotic Bowel Preparation Significantly Reduces Surgical Site Infection Rates and Readmission Rates in Elective Colorectal Surgery. Ann Surg. 2015;261(6):1034-40.

358. Güenaga KF, Matos D, Wille-Jørgensen P. Mechanical bowel preparation for elective colorectal surgery. Cochrane Database Syst Rev. 2011;(9):CD001544.

359. Anjum N, Ren J, Wang G, Li G, Wu X, Dong H, et al. A Randomized Control Trial of Preoperative Oral Antibiotics as Adjunct Therapy to Systemic Antibiotics for Preventing Surgical Site Infection in Clean Contaminated, Contaminated, and Dirty Type of Colorectal Surgeries. Dis Colon Rectum. 2017;60(12):1291-8.

360. Hata H, Yamaguchi T, Hasegawa S, Nomura A, Hida K, Nishitai R, et al. Oral and Parenteral Versus Parenteral Antibiotic Prophylaxis in Elective Laparoscopic Colorectal Surgery (JMTO PREV 07-01): A Phase 3, Multicenter, Open-label, Randomized Trial. Ann Surg. 2016;263(6):1085-91.

361. Oshima T, Takesue Y, Ikeuchi H, Matsuoka H, Nakajima K, Uchino M, et al. Preoperative oral antibiotics and intravenous antimicrobial prophylaxis reduce the incidence of surgical site infections in patients with ulcerative colitis undergoing IPAA. Dis Colon Rectum. 2013;56(10):1149-55.

362. Cannon JA, Altom LK, Deierhoi RJ, Morris M, Richman JS, Vick CC, et al. Preoperative oral antibiotics reduce surgical site infection following elective colorectal resections. Dis Colon Rectum. 2012;55(11):1160-6.

363. Mulder T, Crolla RMPH, Kluytmans-van den Bergh MFQ, van Mourik MSM, Romme J, van der Schelling GP, et al. Preoperative oral antibiotic prophylaxis reduces surgical site infections after elective colorectal surgery: results from a before-after study. Clin Infect Dis. 2019;69(1):93-99.

364. Higgins A, London J, Charland S, Ratzer E, Clark J, Haun W, et al. Prophylactic antibiotics for elective laparoscopic cholecystectomy: are they necessary? Arch Surg. 1999;134(6):611-3; discussion 614.

365. Koc M, Zulfikaroglu B, Kece C, Ozalp N. A prospective randomized study of prophylactic antibiotics in elective laparoscopic cholecystectomy. Surg Endosc. 2003;17(11):1716-8.

366. Chang W-T, Lee K-T, Chuang S-C, Wang S-N, Kuo K-K, Chen J-S, et al. The impact of prophylactic antibiotics on postoperative infection complication in elective laparoscopic cholecystectomy: a prospective randomized study. Am J Surg. 2006;191(6):721-5.

367. Harling R, Moorjani N, Perry C, MacGowan AP, Thompson MH. A prospective, randomised trial of prophylactic antibiotics versus bag extraction in the prophylaxis of wound infection in laparoscopic cholecystectomy. Ann R Coll Surg Engl. 2000;82(6):408-10.

368. Illig KA, Schmidt E, Cavanaugh J, Krusch D, Sax HC. Are prophylactic antibiotics required for elective laparoscopic cholecystectomy? J Am Coll Surg. 1997;184(4):353-6.

369. Grant MD, Jones RC, Wilson SE, Bombeck CT, Flint LM, Jonasson O, et al. Single dose cephalosporin prophylaxis in high-risk patients undergoing surgical treatment of the biliary tract. Surg Gynecol Obstet. 1992;174(5):347-54.

370. Mozafar* M, Sobhiyeh MR, Moghadam LH. Infections after laparoscopic and open cholecystectomy: ceftriaxone versus placebo; a double blind randomized clinical trial. Archives of Clinical Infectious Diseases. 2010;5(1):3-8.

371. Al-Khudairy N, Al-Tameem M, Mofti A et al. Prophylactic antibiotics in elective cholecystectomy: Prospective trial. Current Therapeutic Research - Clinical and Experimental 1988 44:2 (213-219).

372. Varela JE, Wilson SE, Nguyen NT. Laparoscopic surgery significantly reduces surgical-site infections compared with open surgery. Surg Endosc. 2010;24(2):270-6.

373. Siddiqui K, Khan AFA. Comparison of frequency of wound infection: open vs laparoscopic cholecystectomy. J Ayub Med Coll Abbottabad. 2006;18(3):21-4.

374. Agrawal CS, Sehgal R, Singh RK, Gupta AK. Antibiotic prophylaxis in elective cholecystectomy: a randomized, double blinded study comparing ciprofloxacin and cefuroxime. Indian J Physiol Pharmacol. 1999;43(4):501-4.

375. Lapointe RW, Roy AF, Turgeon PL, Lewis RT, Dagenais MH, Joly JR, et al. Comparison of single-dose cefotetan and multidose cefoxitin as intravenous prophylaxis in elective, open biliary tract surgery: a multicentre, double-blind, randomized study. Can J Surg. 1994;37(4):313-8.

376. Krajden S, Yaman M, Fuksa M, Langer JC, Rowan J, Burul CJ, et al. Piperacillin versus cefazolin given perioperatively to high-risk patients who undergo open cholecystectomy: a double-blind, randomized trial. Can J Surg. 1993;36(3):245-50.

377. Meijer WS, Schmitz PI, Jeekel J. Meta-analysis of randomized, controlled clinical trials of antibiotic prophylaxis in biliary tract surgery. Br J Surg. 1990;77(3):283-90.

378. el Mufti MB, Glessa A. Single-dose clavulanate-potentiated amoxycillin versus three-dose cefotaxime in the prevention of wound infection following elective cholecystectomy: a prospective randomized study. J Int Med Res. 1988;16(2):92-7.

379. Keighley MR, Baddeley RM, Burdon DW, Edwards JA, Quoraishi AH. A controlled trial of parenteral prophylactic gentamicin therapy in biliary surgery. Br J Surg. 1975;62(4):275-9.

380. Matsui Y, Satoi S, Kaibori M, Toyokawa H, Yanagimoto H, Matsui K, et al. Antibiotic prophylaxis in laparoscopic cholecystectomy: a randomized controlled trial. PLoS ONE. 2014;9(9):e106702.

381. Mirani AJ, Suchdev SD, Jatoi AH, Haseeb A, Younus SM. Use of antibiotic prophylaxis in low-risk laparoscopic cholecystectomy is unnecessary: A clinical trial. Pakistan Journal of Medical and Health Sciences. 2014;8:3(713-716).

382. Turk E, Karagulle E, Serefhanoglu K, Turan H, Moray G. Effect of cefazolin prophylaxis on postoperative infectious complications in elective laparoscopic cholecystectomy: a prospective randomized study. Iran Red Crescent Med J. 2013;15(7):581-6.

383. Shah JN, Maharjan SB, Paudyal S. Routine use of antibiotic prophylaxis in low-risk laparoscopic cholecystectomy is unnecessary: a randomized clinical trial. Asian J Surg. 2012;35(4):136-9.

384. Yan R-C, Shen S-Q, Chen Z-B, Lin F-S, Riley J. The role of prophylactic antibiotics in laparoscopic cholecystectomy in preventing postoperative infection: a meta-analysis. J Laparoendosc Adv Surg Tech A. 2011;21(4):301-6.

385. Al-Qahtani HH. The Impact of Antibiotics Prophylaxis in Elective Laparoscopic Cholecystectomy: A Prospective Randomized Study. Journal of Taibah University Medical Sciences. 2011;6(2):132-8.

386. Mahatharadol V. A reevaluation of antibiotic prophylaxis in laparoscopic cholecystectomy: a randomized controlled trial. J Med Assoc Thai. 2001;84(1):105-8.

387. Naqvi MA, Mehraj A, Ejaz R, Mian A. Role of prophylactic antibiotics in low risk elective laparoscopic cholecystectomy: is there a need? J Ayub Med Coll Abbottabad. 2013;25(1-2):172-4.

388. Kuthe SA, Kaman L, Verma GR, Singh R. Evaluation of the role of prophylactic antibiotics in elective laparoscopic cholecystectomy: a prospective randomized trial. Trop Gastroenterol. 2006;27(1):54-7.

389. Sanabria A, Dominguez LC, Valdivieso E, Gomez G. Antibiotic prophylaxis for patients undergoing elective laparoscopic cholecystectomy. Cochrane Database Syst Rev. 2010;(12):CD005265.

390. Ruangsin S, Laohawiriyakamol S, Sunpaweravong S, Mahattanobon S. The efficacy of cefazolin in reducing surgical site infection in laparoscopic cholecystectomy: a prospective randomized double-blind controlled trial. Surg Endosc. 2015;29(4):874-81.

391. Uludag M, Yetkin G, Citgez B. The role of prophylactic antibiotics in elective laparoscopic cholecystectomy. JSLS. 2009;13(3):337-41.

392. Kumar A, Patodia M, Pandove PK, Sharda VK, Pahwa S. Role of Antibiotic Prophylaxis in Laparoscopic Cholecystectomy: A Randomized Prospective Study. Journal international medical Sciences Academy 2013 26:4(209-211). 2013;26(4):4.

393. Sirinek KR, Schauer PR, Yellin AE, Berne TV, Heseltine P, Appleman M, et al. Single-dose cefuroxime versus multiple-dose cefazolin as prophylactic therapy for high-risk cholecystectomy. J Am Coll Surg. 1994;178(4):321-5.

394. Karaca AS, Gündoğdu H, Özdoğan M, Ersoy E. Intravenous Versus Oral Antibiotic Prophylaxis Efficacy for Elective Laparoscopic Cholecystectomies: a Prospective Randomized Controlled Trial. Indian J Surg. 2015;77(Suppl 2):640-4.

395. Sarkut P, Kilicturgay S, Aktas H, Ozen Y, Kaya E. Routine Use of Prophylactic Antibiotics during Laparoscopic Cholecystectomy Does Not Reduce the Risk of Surgical Site Infections. Surg Infect (Larchmt). 2017;18(5):603-9.

396. Dobay KJ, Freier DT, Albear P. The absent role of prophylactic antibiotics in low-risk patients undergoing laparoscopic cholecystectomy. Am Surg. 1999;65(3):226-8.

397. Zhou H, Zhang J, Wang Q, Hu Z. Meta-analysis: Antibiotic prophylaxis in elective laparoscopic cholecystectomy. Aliment Pharmacol Ther. 2009;29(10):1086-95.

398. Choudhary A, Bechtold ML, Puli SR, Othman MO, Roy PK. Role of prophylactic antibiotics in laparoscopic cholecystectomy: a meta-analysis. J Gastrointest Surg. 2008;12(11):1847-53; discussion 1853.

399. Matsui Y, Satoi S, Hirooka S, Kosaka H, Kawaura T, Kitawaki T. Reappraisal of previously reported meta-analyses on antibiotic prophylaxis for low-risk laparoscopic cholecystectomy: an overview of systematic reviews. BMJ Open. 2018;8(3):e016666.

400. Togo S, Matsuo K, Tanaka K, Matsumoto C, Shimizu T, Ueda M, et al. Perioperative infection control and its effectiveness in hepatectomy patients. J Gastroenterol Hepatol. 2007;22(11):1942-8.

401. Wu CC, Yeh DC, Lin MC, Liu TJ, P’eng FK. Prospective randomized trial of systemic antibiotics in patients undergoing liver resection. Br J Surg. 1998;85(4):489-93.

402. Hirokawa F, Hayashi M, Miyamoto Y, Asakuma M, Shimizu T, Komeda K, et al. Evaluation of postoperative antibiotic prophylaxis after liver resection: a randomized controlled trial. Am J Surg. 2013;206(1):8-15.

403. Zhou Y-M, Chen Z-Y, Li X-D, Xu D-H, Su X, Li B. Preoperative Antibiotic Prophylaxis Does Not Reduce the Risk of Postoperative Infectious Complications in Patients Undergoing Elective Hepatectomy. Dig Dis Sci. 2016;61(6):1707-13.

404. Arikawa T, Kurokawa T, Ohwa Y, Ito N, Kotake K, Nagata H, et al. Risk factors for surgical site infection after hepatectomy for hepatocellular carcinoma. Hepatogastroenterology. 2011;58(105):143-6.

405. Kaibori M, Ishizaki M, Matsui K, Kwon A-H. Postoperative infectious and non-infectious complications after hepatectomy for hepatocellular carcinoma. Hepatogastroenterology. 2011;58(110-111):1747-56.

406. Nanashima A, Arai J, Oyama S, Ishii M, Abo T, Wada H, et al. Associated factors with surgical site infections after hepatectomy: predictions and countermeasures by a retrospective cohort study. Int J Surg. 2014;12(4):310-4.

407. Jarnagin WR, Gonen M, Fong Y, DeMatteo RP, Ben-Porat L, Little S, et al. Improvement in perioperative outcome after hepatic resection: analysis of 1,803 consecutive cases over the past decade. Ann Surg. 2002;236(4):397-406; discussion 406-407.

408. Okabayashi T, Nishimori I, Yamashita K, Sugimoto T, Yatabe T, Maeda H, et al. Risk factors and predictors for surgical site infection after hepatic resection. J Hosp Infect. 2009;73(1):47-53.

409. Uchiyama K, Ueno M, Ozawa S, Kiriyama S, Kawai M, Hirono S, et al. Risk factors for postoperative infectious complications after hepatectomy. J Hepatobiliary Pancreat Sci. 2011;18(1):67-73.

410. Moreno Elola-Olaso A, Davenport DL, Hundley JC, Daily MF, Gedaly R. Predictors of surgical site infection after liver resection: a multicentre analysis using National Surgical Quality Improvement Program data. HPB (Oxford). 2012;14(2):136-41.

411. Kobayashi S, Gotohda N, Nakagohri T, Takahashi S, Konishi M, Kinoshita T. Risk factors of surgical site infection after hepatectomy for liver cancers. World J Surg. 2009;33(2):312-7.

412. Coelho FF, Kruger JAP, Fonseca GM, Araújo RLC, Jeismann VB, Perini MV, et al. Laparoscopic liver resection: Experience based guidelines. World J Gastrointest Surg. 2016;8(1):5-26.

413. Sugawara G, Yokoyama Y, Ebata T, Mizuno T, Yagi T, Ando M, et al. Duration of Antimicrobial Prophylaxis in Patients Undergoing Major Hepatectomy With Extrahepatic Bile Duct Resection: A Randomized Controlled Trial. Ann Surg. 2018;267(1):142-8.

414. Sugawara G, Yokoyama Y, Ebata T, Igami T, Yamaguchi J, Mizuno T, et al. Preoperative biliary colonization/infection caused by multidrug-resistant (MDR) pathogens in patients undergoing major hepatectomy with extrahepatic bile duct resection. Surgery. 2018;163(5):1106-13.

415. Cameron JL, Riall TS, Coleman J, Belcher KA. One thousand consecutive pancreaticoduodenectomies. Ann Surg. 2006;244(1):10-5.

416. Ceppa EP, Pitt HA, House MG, Kilbane EM, Nakeeb A, Schmidt CM, et al. Reducing surgical site infections in hepatopancreatobiliary surgery. HPB (Oxford). 2013;15(5):384-91.

417. Takahashi Y, Takesue Y, Fujiwara M, Tatsumi S, Ichiki K, Fujimoto J, et al. Risk factors for surgical site infection after major hepatobiliary and pancreatic surgery. J Infect Chemother. 2018;24(9):739-43.

418. Fujino Y. Perioperative management of distal pancreatectomy. World J Gastroenterol. 2015;21(11):3166-9.

419. Frenette C, Sperlea D, Leharova Y, Thirion DJG. Impact of an Infection Control and Antimicrobial Stewardship Program on Solid Organ Transplantation and Hepatobiliary Surgical Site Infections. Infect Control Hosp Epidemiol. 2016;37(12):1468-74.

420. Okamura K, Tanaka K, Miura T, Nakanishi Y, Noji T, Nakamura T, et al. Randomized controlled trial of perioperative antimicrobial therapy based on the results of preoperative bile cultures in patients undergoing biliary reconstruction. J Hepatobiliary Pancreat Sci. 2017;24(7):382-93.

421. Sudo T, Murakami Y, Uemura K, Hashimoto Y, Kondo N, Nakagawa N, et al. Perioperative antibiotics covering bile contamination prevent abdominal infectious complications after pancreatoduodenectomy in patients with preoperative biliary drainage. World J Surg. 2014;38(11):2952-9.

422. Muñoz Casares FC, Medina Fernández FJ, Natera Kindelán C. Infección en cirugía oncológica peritoneal avanzada. En: Guirao Garriga X, Badía Pérez JM, eds. Guías Clínicas de la Asociación Española de Cirujanos no9: Infecciones Quirúrgicas. Madrid: Editorial Arán 2016; p. 442-453.

423. Capone A, Valle M, Proietti F, Federici O, Garofalo A, Petrosillo N. Postoperative infections in cytoreductive surgery with hyperthermic intraperitoneal intraoperative chemotherapy for peritoneal carcinomatosis. J Surg Oncol. 2007;96(6):507-13.

424. Valle M, Federici O, Carboni F, Toma L, Gallo MT, Prignano G, et al. Postoperative infections after cytoreductive surgery and HIPEC for peritoneal carcinomatosis: proposal and results from a prospective protocol study of prevention, surveillance and treatment. Eur J Surg Oncol. 2014;40(8):950-6.

425. Wolf JS, Bennett CJ, Dmochowski RR, Hollenbeck BK, Pearle MS, Schaeffer AJ, et al. Best practice policy statement on urologic surgery antimicrobial prophylaxis. J Urol. 2008;179(4):1379-90.

426. Foon R, Toozs-Hobson P, Latthe P. Prophylactic antibiotics to reduce the risk of urinary tract infections after urodynamic studies. Cochrane Database Syst Rev. 2012;10:CD008224.

427. Jiménez Cruz JF, Sanz Chinesta S, Otero G, Díaz González R, Alvarez Ruiz F, Flores N, et al. [Antimicrobial prophylaxis in urethrocystoscopy. Comparative study]. Actas Urol Esp. 1993;17(3):172-5.

428. Carey MM, Zreik A, Fenn NJ, Chlosta PL, Aboumarzouk OM. Should We Use Antibiotic Prophylaxis for Flexible Cystoscopy? A Systematic Review and Meta-Analysis. Urol Int. 2015;95(3):249-59.

429. Mrkobrada M, Ying I, Mokrycke S, Dresser G, Elsayed S, Bathini V, et al. CUA Guidelines on antibiotic prophylaxis for urologic procedures. Can Urol Assoc J. 2015;9(1-2):13-22.

430. Clark KR, Higgs MJ. Urinary infection following out-patient flexible cystoscopy. Br J Urol. 1990;66(5):503-5.

431. Herr HW. The risk of urinary tract infection after flexible cystoscopy in patients with bladder tumor who did not receive prophylactic antibiotics. J Urol. 2015;193(2):548-51.

432. Escandón-Vargas K, García-Perdomo HA, Echeverría F, Osorio JD. Risk of urinary tract infection in patients with positive urine culture and antibiotic therapy undergoing cystoscopy in a third-level hospital. Infez Med. 2015;23(4):336-42.

433. Arrabal-Polo MA, Cano-García MDC, Arrabal-Martín M, Merino-Salas S. The Effect of Antibiotic Prophylaxis on Post-Operative Infection in Patients Undergone Flexible Cystos-copy. Urol J. 2017;14(3):3050-3.

434. Tsugawa M, Monden K, Nasu Y, Kumon H, Ohmori H. Prospective randomized comparative study of antibiotic prophylaxis in urethrocystoscopy and urethrocystography. Int J Urol. 1998;5(5):441-3.

435. Wilson L, Ryan J, Thelning C, Masters J, Tuckey J. Is antibiotic prophylaxis required for flexible cystoscopy? A truncated randomized double-blind controlled trial. J Endourol. 2005;19(8):1006-8.

436. Johnson MI, Merrilees D, Robson WA, Lennon T, Masters J, Orr KE, et al. Oral ciprofloxacin or trimethoprim reduces bacteriuria after flexible cystoscopy. BJU Int. 2007;100(4):826-9.

437. Siracusano S, Knez R, Tiberio A, Simonazzi M, Alfano V, Giannantoni G, et al. Is antibiotic prophylaxis in invasive urodynamics a useful procedure in postmenopausal subjects? Urologia. 2008;75(1):89-93.

438. García-Perdomo HA, López H, Carbonell J, Castillo D, Cataño JG, Serón P. Efficacy of antibiotic prophylaxis in patients undergoing cystoscopy: a randomized clinical trial. World J Urol. 2013;31(6):1433-9.

439. Berry A, Barratt A. Prophylactic antibiotic use in transurethral prostatic resection: a meta-analysis. J Urol. 2002;167(2 Pt 1):571-7.

440. Qiang W, Jianchen W, MacDonald R, Monga M, Wilt TJ. Antibiotic prophylaxis for transurethral prostatic resection in men with preoperative urine containing less than 100,000 bacteria per ml: a systematic review. J Urol. 2005;173(4):1175-81.

441. Wagenlehner FME, Wagenlehner C, Schinzel S, Naber KG, Working Group «Urological Infections» of German Society of Urology. Prospective, randomized, multicentric, open, comparative study on the efficacy of a prophylactic single dose of 500 mg levofloxacin versus 1920 mg trimethoprim/sulfamethoxazole versus a control group in patients undergoing TUR of the prostate. Eur Urol. 2005;47(4):549-56.

442. Zani EL, Clark OAC, Rodrigues Netto N. Antibiotic prophylaxis for transrectal prostate biopsy. Cochrane Database Syst Rev. 2011;(5):CD006576.

443. Wagenlehner FME, Thomas PM, Naber KG. Fosfomycin trometamol (3,000 mg) in perioperative antibiotic prophylaxis of healthcare-associated infections after endourological interventions: a narrative review. Urol Int. 2014;92(2):125-30.

444. Yang L, Tang Z, Gao L, Li T, Chen Y, Liu L, et al. The augmented prophylactic antibiotic could be more efficacious in patients undergoing transrectal prostate biopsy: a systematic review and meta-analysis. Int Urol Nephrol. 2016;48(8):1197-207.

445. Delavierre D, Huiban B, Fournier G, Le Gall G, Tande D, Mangin P. [The value of antibiotic prophylaxis in transurethral resection of bladder tumors. Apropos of 61 cases]. Prog Urol. 1993;3(4):577-82.

446. Klimberg IW, Malek GH, Cox CE, Patterson AL, Whalen E, Kowalsky SF, et al. Single-dose oral ciprofloxacin compared with cefotaxime and placebo for prophylaxis during transurethral surgery. J Antimicrob Chemother. 1999;43 Suppl A:77-84.

447. Yokoyama M, Fujii Y, Yoshida S, Saito K, Koga F, Masuda H, et al. Discarding antimicrobial prophylaxis for transurethral resection of bladder tumor: a feasibility study. Int J Urol. 2009;16(1):61-3.

448. Christiano AP, Hollowell CM, Kim H, Kim J, Patel R, Bales GT, et al. Double-blind randomized comparison of single-dose ciprofloxacin versus intravenous cefazolin in patients undergoing outpatient endourologic surgery. Urology. 2000;55(2):182-5.

449. Abbott JE, Han A, McDonald M, Lakin C, Sur RL. Are antibiotics necessary during routine cystoscopic stent removal? Transl Androl Urol. 2016;5(5):784-8.

450. Fourcade RO. Antibiotic prophylaxis with cefotaxime in endoscopic extraction of upper urinary tract stones: a randomized study. The Cefotaxime Cooperative Group. J Antimicrob Chemother. 1990;26 Suppl A:77-83.

451. Knopf H-J, Graff H-J, Schulze H. Perioperative antibiotic prophylaxis in ureteroscopic stone removal. Eur Urol. 2003;44(1):115-8.

452. Hsieh C-H, Yang SS-D, Lin C-D, Chang S-J. Are prophylactic antibiotics necessary in patients with preoperative sterile urine undergoing ureterorenoscopic lithotripsy? BJU Int. 2014;113(2):275-80.

453. Martov A, Gravas S, Etemadian M, Unsal A, Barusso G, D’Addessi A, et al. Postoperative infection rates in patients with a negative baseline urine culture undergoing ureteroscopic stone removal: a matched case-control analysis on antibiotic prophylaxis from the CROES URS global study. J Endourol. 2015;29(2):171-80.

454. Deng T, Liu B, Duan X, Cai C, Zhao Z, Zhu W, et al. Antibiotic prophylaxis in ureteroscopic lithotripsy: a systematic review and meta-analysis of comparative studies. BJU Int. 2018;122(1):29-39.

455. Lo C-W, Yang SS-D, Hsieh C-H, Chang S-J. Effectiveness of Prophylactic Antibiotics against Post-Ureteroscopic Lithotripsy Infections: Systematic Review and Meta-Analysis. Surg Infect (Larchmt). 2015;16(4):415-20.

456. Chew BH, Flannigan R, Kurtz M, Gershman B, Arsovska O, Paterson RF, et al. A Single Dose of Intraoperative Antibiotics Is Sufficient to Prevent Urinary Tract Infection During Ureteroscopy. J Endourol. 2016;30(1):63-8.

457. G. Bonkat et al. Guidelines on Urological Infections 2017. Available from URL: https://uroweb.org/guideline/urological-infections/?type=archive.

458. Bierkens AF, Hendrikx AJ, Ezz el Din KE, de la Rosette JJ, Horrevorts A, Doesburg W, et al. The value of antibiotic prophylaxis during extracorporeal shock wave lithotripsy in the prevention of urinary tract infections in patients with urine proven sterile prior to treatment. Eur Urol. 1997;31(1):30-5.

459. Hsieh C-H, Yang SS-D, Chang S-J. The Effectiveness of Prophylactic Antibiotics with Oral Levofloxacin against Post-Shock Wave Lithotripsy Infectious Complications: A Randomized Controlled Trial. Surg Infect (Larchmt). 2016;17(3):346-51.

460. Mira Moreno A, Montoya Lirola MD, García Tabar PJ, Galiano Baena JF, Tenza Tenza JA, Lobato Encinas JJ. Incidence of infectious complications after extracorporeal shock wave lithotripsy in patients without associated risk factors. J Urol. 2014;192(5):1446-9.

461. Lu Y, Tianyong F, Ping H, Liangren L, Haichao Y, Qiang W. Antibiotic prophylaxis for shock wave lithotripsy in patients with sterile urine before treatment may be unnecessary: a systematic review and meta-analysis. J Urol. 2012;188(2):441-8.

462. Steiner T, Traue C, Schubert J. [Perioperative antibiotic prophylaxis in transperitoneal tumor nephrectomy: does it lower the rate of clinically significant postoperative infections?]. Urologe A. 2003;42(1):34-7.

463. Pessaux P, Atallah D, Lermite E, Msika S, Hay J-M, Flamant Y, et al. Risk factors for prediction of surgical site infections in «clean surgery». Am J Infect Control. 2005;33(5):292-8.

464. Yamamoto S, Kunishima Y, Kanamaru S, Ito N, Kinoshita H, Kamoto T, et al. [A multi-center prospective study for antibiotic prophylaxis to prevent perioperative infections in urologic surgery]. Hinyokika Kiyo. 2004;50(10):673-83.

465. Montgomery JS, Johnston WK, Wolf JS. Wound complications after hand assisted laparoscopic surgery. J Urol. 2005;174(6):2226-30.

466. Kijima T, Masuda H, Yoshida S, Tatokoro M, Yokoyama M, Numao N, et al. Antimicrobial prophylaxis is not necessary in clean category minimally invasive surgery for renal and adrenal tumors: a prospective study of 373 consecutive patients. Urology. 2012;80(3):570-5.

467. Togo Y, Tanaka S, Kanematsu A, Ogawa O, Miyazato M, Saito H, et al. Antimicrobial prophylaxis to prevent perioperative infection in urological surgery: a multicenter study. J Infect Chemother. 2013;19(6):1093-101.

468. Darenkov AF, Derevianko II, Martov AG, Kotliarova GA, Kondrat’eva EM, Siniukhin VN. [The prevention of infectious-inflammatory complications in the postoperative period in percutaneous surgical interventions in patients with urolithiasis]. Urol Nefrol (Mosk). 1994;(2):24-6.

469. Doğan HS, Sahin A, Cetinkaya Y, Akdoğan B, Ozden E, Kendi S. Antibiotic prophylaxis in percutaneous nephrolithotomy: prospective study in 81 patients. J Endourol. 2002;16(9):649-53.

470. Mariappan P, Smith G, Moussa SA, Tolley DA. One week of ciprofloxacin before percutaneous nephrolithotomy significantly reduces upper tract infection and urosepsis: a prospective controlled study. BJU Int. 2006;98(5):1075-9.

471. Gravas S, Montanari E, Geavlete P, Onal B, Skolarikos A, Pearle M, et al. Postoperative infection rates in low risk patients undergoing percutaneous nephrolithotomy with and without antibiotic prophylaxis: a matched case control study. J Urol. 2012;188(3):843-7.

472. Bag S, Kumar S, Taneja N, Sharma V, Mandal AK, Singh SK. One week of nitrofurantoin before percutaneous nephrolithotomy significantly reduces upper tract infection and urosepsis: a prospective controlled study. Urology. 2011;77(1):45-9.

473. Seyrek M, Binbay M, Yuruk E, Akman T, Aslan R, Yazici O, et al. Perioperative prophylaxis for percutaneous nephrolithotomy: randomized study concerning the drug and dosage. J Endourol. 2012;26(11):1431-6.

474. Potretzke AM, Park AM, Bauman TM, Larson JA, Vetter JM, Benway BM, et al. Is extended preoperative antibiotic prophylaxis for high-risk patients necessary before percutaneous nephrolithotomy? Investig Clin Urol. 2016;57(6):417-23.

475. Demirtas A, Yildirim YE, Sofikerim M, Kaya EG, Akinsal EC, Tombul ST, et al. Comparison of infection and urosepsis rates of ciprofloxacin and ceftriaxone prophylaxis before percutaneous nephrolithotomy: a prospective and randomised study. ScientificWorldJournal. 2012;916381.

476. Haifler M, Mor Y, Dotan Z, Ramon J, Zilberman DE. Prophylactic antibiotic treatment following laparoscopic robot-assisted radical prostatectomy for the prevention of catheter-associated urinary tract infections: did the AUA guidelines make a difference? J Robot Surg. 2017;11(3):367-71.

477. Stranne J, Aus G, Hansson C, Lodding P, Pileblad E, Hugosson J. Single-dose orally administered quinolone appears to be sufficient antibiotic prophylaxis for radical retropubic prostatectomy. Scand J Urol Nephrol. 2004;38(2):143-7.

478. Terai A, Ichioka K, Kohei N, Ueda N, Utsunomiya N, Inoue K. Antibiotic prophylaxis in radical prostatectomy: 1-day versus 4-day treatments. Int J Urol. 2006;13(12):1488-93.

479. Takeyama K, Takahashi S, Maeda T, Mutoh M, Kunishima Y, Matsukawa M, et al. Comparison of 1-day, 2-day, and 3-day administration of antimicrobial prophylaxis in radical prostatectomy. J Infect Chemother. 2007;13(5):320-3.

480. Sakura M, Kawakami S, Yoshida S, Masuda H, Kobayashi T, Kihara K. Prospective comparative study of single dose versus 3-day administration of antimicrobial prophylaxis in minimum incision endoscopic radical prostatectomy. Int J Urol. 2008;15(4):328-31.

481. Shigemura K, Tanaka K, Matsumoto M, Nakano Y, Shirakawa T, Miyata M, et al. Post-operative infection and prophylactic antibiotic administration after radical cystectomy with orthotopic neobladder urinary diversion. J Infect Chemother. 2012;18(4):479-84.

482. Krasnow RE, Mossanen M, Koo S, Kubiak DW, Preston MA, Chung BI, et al. Prophylactic Antibiotics and Postoperative Complications of Radical Cystectomy: A Population Based Analysis in the United States. J Urol. 2017;198(2):297-304.

483. Pariser JJ, Anderson BB, Pearce SM, Han Z, Rodriguez JA, Landon E, et al. The effect of broader, directed antimicrobial prophylaxis including fungal coverage on perioperative infectious complications after radical cystectomy. Urol Oncol. 2016;34(3):121.e9-14.

484. Hara N, Kitamura Y, Saito T, Komatsubara S, Nishiyama T, Takahashi K. Perioperative antibiotics in radical cystectomy with ileal conduit urinary diversion: efficacy and risk of antimicrobial prophylaxis on the operation day alone. Int J Urol. 2008;15(6):511-5.

485. Yang L, Gao L, Chen Y, Tang Z, Liu L, Han P, et al. Prophylactic Antibiotics in Prostate Biopsy: A Meta-Analysis Based on Randomized Controlled Trials. Surg Infect (Larchmt). 2015;16(6):733-47.

486. Schaeffer AJ, Montorsi F, Scattoni V, Perroncel R, Song J, Haverstock DC, et al. Comparison of a 3-day with a 1-day regimen of an extended-release formulation of ciprofloxacin as antimicrobial prophylaxis for patients undergoing transrectal needle biopsy of the prostate. BJU Int. 2007;100(1):51-7.

487. Bangash HK, Hawks C, McCombie SP, Brown M, Hayne D. Transrectal prostate biopsy sepsis rate following reduced quinolone antibiotic prophylaxis from six doses to single dose. ANZ J Surg. 2018; Jan 8 [in press] doi: 10.1111/ans.14360.

488. Rhodes NJ, Gardiner BJ, Neely MN, Grayson ML, Ellis AG, Lawrentschuk N, et al. Optimal timing of oral fosfomycin administration for pre-prostate biopsy prophylaxis. J Antimicrob Chemother. 2015;70(7):2068-73.

489. Noreikaite J, Jones P, Fitzpatrick J, Amitharaj R, Pietropaolo A, Vasdev N, et al. Fosfomycin vs. quinolone-based antibiotic prophylaxis for transrectal ultrasound-guided biopsy of the prostate: a systematic review and meta-analysis. Prostate Cancer Prostatic Dis. 2018;21(2):153-60.

490. Scott S, Harris PN, Williamson DA, Liss MA, Doi SAR, Roberts MJ. The effectiveness of targeted relative to empiric prophylaxis on infectious complications after transrectal ultrasound-guided prostate biopsy: a meta-analysis. World J Urol. 2018;36(7):1007-17.

491. Bootsma AMJ, Laguna Pes MP, Geerlings SE, Goossens A. Antibiotic prophylaxis in urologic procedures: a systematic review. Eur Urol. 2008;54(6):1270-86.

492. Schwartz BF, Swanzy S, Thrasher JB. A randomized prospective comparison of antibiotic tissue levels in the corpora cavernosa of patients undergoing penile prosthesis implantation using gentamicin plus cefazolin versus an oral fluoroquinolone for prophylaxis. J Urol. 1996;156(3):991-4.

493. Carson CC. Diagnosis, treatment and prevention of penile prosthesis infection. Int J Impot Res. 2003;15 Suppl 5:S139-146.

494. Muench PJ. Infections versus penile implants: the war on bugs. J Urol. 2013;189(5):1631-7.

495. Al Mohajer M, Darouiche RO. Infections Associated with Inflatable Penile Prostheses. Sex Med Rev. 2014;2(3-4):134-40.

496. Rizk DE, Nsanze H, Mabrouk MH, Mustafa N, Thomas L, Kumar M. Systemic antibiotic prophylaxis in elective cesarean delivery. Int J Gynaecol Obstet. 1998;61(3):245-51.

497. Rouzi AA, Khalifa F, Ba’aqeel H, Al-Hamdan HS, Bondagji N. The routine use of cefazolin in cesarean section. Int J Gynaecol Obstet. 2000;69(2):107-12.

498. Bagratee JS, Moodley J, Kleinschmidt I, Zawilski W. A randomised controlled trial of antibiotic prophylaxis in elective caesarean delivery. BJOG. 2001;108(2):143-8.

499. Duff P, Smith PN, Keiser JF. Antibiotic prophylaxis in low-risk cesarean section. J Reprod Med. 1982;27(3):133-8.

500. Apuzzio JJ, Reyelt C, Pelosi M, Sen P, Louria DB. Prophylactic antibiotics for cesarean section: comparison of high- and low-risk patients for endomyometritis. Obstet Gynecol. 1982;59(6):693-8.

501. Jakobi P, Weissman A, Sigler E, Margolis K, Zimmer EZ. Post-cesarean section febrile morbidity. Antibiotic prophylaxis in low-risk patients. J Reprod Med. 1994;39(9):707-10.

502. Chelmow D, Ruehli MS, Huang E. Prophylactic use of antibiotics for nonlaboring patients undergoing cesarean delivery with intact membranes: a meta-analysis. Am J Obstet Gynecol. 2001;184(4):656-61.

503. Smaill F, Hofmeyr GJ. Antibiotic prophylaxis for cesarean section. Cochrane Database Syst Rev. 2002;(3):CD000933.

504. Bassetti M, Righi E, Astilean A, Corcione S, Petrolo A, Farina EC, et al. Antimicrobial prophylaxis in minor and major surgery. Minerva Anestesiol. 2015;81(1):76-91.

505. Obstetric and medical complications. In: American Academy of Pediatrics and American College of Obstetricians and Gynecologists. Guidelines for peri- natal care. 6th ed. Elk Grove Village, IL: American Academy of Pediatrics; 2008:175-204.

506. Hopkins L, Smaill F. Antibiotic prophylaxis regimens and drugs for cesarean section. Cochrane Database Syst Rev. 2000;(2):CD001136.

507. Andrews WW, Hauth JC, Cliver SP, Savage K, Goldenberg RL. Randomized clinical trial of extended spectrum antibiotic prophylaxis with coverage for Ureaplasma urealyticum to reduce post-cesarean delivery endometritis. Obstet Gynecol. 2003;101(6):1183-9.

508. Meyer NL, Hosier KV, Scott K, Lipscomb GH. Cefazolin versus cefazolin plus metronidazole for antibiotic prophylaxis at cesarean section. South Med J. 2003;96(10):992-5.

509. Tita ATN, Szychowski JM, Boggess K, Saade G, Longo S, Clark E, et al. Adjunctive Azithromycin Prophylaxis for Cesarean Delivery. N Engl J Med. 2016;375(13):1231-41.

510. Tita ATN, Hauth JC, Grimes A, Owen J, Stamm AM, Andrews WW. Decreasing incidence of postcesarean endometritis with extended-spectrum antibiotic prophylaxis. Obstet Gynecol. 2008;111(1):51-6.

511. Tita ATN, Owen J, Stamm AM, Grimes A, Hauth JC, Andrews WW. Impact of extended-spectrum antibiotic prophylaxis on incidence of postcesarean surgical wound infection. Am J Obstet Gynecol. 2008;199(3):303.e1-3.

512. Costantine MM, Rahman M, Ghulmiyah L, Byers BD, Longo M, Wen T, et al. Timing of perioperative antibiotics for cesarean delivery: a metaanalysis. Am J Obstet Gynecol. 2008;199(3):301.e1-6.

513. Witt A, Döner M, Petricevic L, Berger A, Germann P, Heinze G, et al. Antibiotic prophylaxis before surgery vs after cord clamping in elective cesarean delivery: a double-blind, prospective, randomized, placebo-controlled trial. Arch Surg. 2011;146(12):1404-9.

514. Berríos-Torres SI, Umscheid CA, Bratzler DW, Leas B, Stone EC, Kelz RR, et al. Centers for Disease Control and Prevention Guideline for the Prevention of Surgical Site Infection, 2017. JAMA Surg. 2017;152(8):784-91.

515. Lyimo FM, Massinde AN, Kidenya BR, Konje ET, Mshana SE. Single dose of gentamicin in combination with metronidazole versus multiple doses for prevention of post-caesarean infection at Bugando Medical Centre in Mwanza, Tanzania: a randomized, equivalence, controlled trial. BMC Pregnancy Childbirth. 2013;13:123.

516. Westen EHMN, Kolk PR, van Velzen CL, Unkels R, Mmuni NS, Hamisi AD, et al. Single-dose compared with multiple day antibiotic prophylaxis for cesarean section in low-resource settings, a randomized controlled, noninferiority trial. Acta Obstet Gynecol Scand. 2015;94(1):43-9.

517. Shakya A, Sharma J. Comparison of single versus multiple doses of antibiotic prophylaxis in reducing post-elective Caesarean section infectious morbidity. Kathmandu Univ Med J (KUMJ). 2010;8(30):179-84.

518. Mangram AJ, Horan TC, Pearson ML, Silver LC, Jarvis WR. Guideline for prevention of surgical site infection, 1999. Hospital Infection Control Practices Advisory Committee. Infect Control Hosp Epidemiol. 1999;20(4):250-78; quiz 279-80.

519. Van Eyk N, van Schalkwyk J, INFECTIOUS DISEASES COMMITTEE. Antibiotic prophylaxis in gynaecologic procedures. J Obstet Gynaecol Can. 2012;34(4):382-91.

520. Bratzler DW, Dellinger EP, Olsen KM, Perl TM, Auwaerter PG, Bolon MK, et al. Clinical practice guidelines for antimicrobial prophylaxis in surgery. Surg Infect (Larchmt). 2013;14(1):73-156.

521. ACOG Practice Bulletin No. 195: Prevention of Infection After Gynecologic Procedures. Obstet Gynecol. 2018;131(6):e172-89.

522. Mittendorf R, Aronson MP, Berry RE, Williams MA, Kupelnick B, Klickstein A, et al. Avoiding serious infections associated with abdominal hysterectomy: a meta-analysis of antibiotic prophylaxis. Am J Obstet Gynecol. 1993;169(5):1119-24.

523. Tanos V, Rojansky N. Prophylactic antibiotics in abdominal hysterectomy. J Am Coll Surg. 1994;179(5):593-600.

524. Wttewaall-Evelaar EW. Meta-analysis of randomized controlled trials of antibiotic prophylaxis in abdominal hysterectomy. Pharm Weekbl Sci. 1990;12(6A):296-8; discussion 299.

525. Cormio G, Vicino M, Loizzi V, Tangari D, Selvaggi L. Antimicrobial prophylaxis in vaginal gynecologic surgery: a prospective randomized study comparing amoxicillin-clavulanic acid with cefazolin. J Chemother. 2007;19(2):193-7.

526. Kauer FM, Wijma J, Manson WL. Vaginal hysterectomy: cefuroxime, metronidazole or both? Pharm Weekbl Sci. 1990;12(6A):284-8.

527. Hemsell DL, Menon MO, Friedman AJ. Ceftriaxone or cefazolin prophylaxis for the prevention of infection after vaginal hysterectomy. Am J Surg. 1984;148(4A):22-6.

528. Hemsell DL, Johnson ER, Bawdon RE, Hemsell PG, Nobles BJ, Heard ML. Ceftriaxone and cefazolin prophylaxis for hysterectomy. Surg Gynecol Obstet. 1985;161(3):197-203.

529. Soper DE, Yarwood RL. Single-dose antibiotic prophylaxis in women undergoing vaginal hysterectomy. Obstet Gynecol. 1987;69(6):879-82.

530. Rapp RP, Connors JE, Hager WD, Donaldson ES, van Nagell JR. Comparison of single-dose moxalactam and a three-dose regimen of cefoxitin for prophylaxis in vaginal hysterectomy. Clin Pharm. 1986;5(12):988-93.

531. Roy S, Wilkins J. Single-dose cefotaxime versus 3 to 5 dose cefoxitin for prophylaxis of vaginal or abdominal hysterectomy. J Antimicrob Chemother. 1984;14 Suppl B:217-21.

532. Roy S, Wilkins J, Hemsell DL, March CM, Spirtos NM. Efficacy and safety of single-dose ceftizoxime vs. multiple-dose cefoxitin in preventing infection after vaginal hysterectomy. J Reprod Med. 1988;33(1 Suppl):149-53.

533. Roy S, Wilkins J, Galaif E, Azen C. Comparative efficacy and safety of cefmetazole or cefoxitin in the prevention of postoperative infection following vaginal and abdominal hysterectomy. J Antimicrob Chemother. 1989;23 Suppl D:109-17.

534. Mercer LJ, Murphy HJ, Ismail MA, Hajj SN. A comparison of cefonicid and cefoxitin for preventing infections after vaginal hysterectomy. J Reprod Med. 1988;33(2):223-6.

535. Hemsell DL, Heard ML, Nobles BJ, Hemsell PG. Single-dose cefoxitin prophylaxis for premenopausal women undergoing vaginal hysterectomy. Obstet Gynecol. 1984;63(3):285-90.

536. McGregor JA, Phillips LE, Roy S, Dunne JT, Warwaruk AS, Johnston DW, et al. Results of a double-blind, placebo-controlled clinical trial program of single-dose ceftizoxime versus multiple-dose cefoxitin as prophylaxis for patients undergoing vaginal and abdominal hysterectomy. J Am Coll Surg. 1994;178(2):123-31.

537. Orr JW, Varner RE, Kilgore LC, Holloway RC, McDiarmid M. Cefotetan versus cefoxitin as prophylaxis in hysterectomy. Am J Obstet Gynecol. 1986;154(4):960-3.

538. Orr JW, Sisson PF, Barrett JM, Ellington JR, Jennings RH, Taylor DL. Single-center study results of cefotetan and cefoxitin prophylaxis for abdominal or vaginal hysterectomy. Am J Obstet Gynecol. 1988;158(3 Pt 2):714-6.

539. Berkeley AS, Orr JW, Cavanagh D, Freedman KS, Ledger WJ, Pastorek JG, et al. Comparative effectiveness and safety of cefotetan and cefoxitin as prophylactic agents in patients undergoing abdominal or vaginal hysterectomy. Am J Surg. 1988;155(5A):81-5.

540. Berkeley AS, Freedman KS, Ledger WJ, Orr JW, Benigno BB, Gordon SF, et al. Comparison of cefotetan and cefoxitin prophylaxis for abdominal and vaginal hysterectomy. Am J Obstet Gynecol. 1988;158(3 Pt 2):706-9.

541. Campillo F, Rubio JM. Comparative study of single-dose cefotaxime and multiple doses of cefoxitin and cefazolin as prophylaxis in gynecologic surgery. Am J Surg. 1992;164(4A Suppl):12S-15S.

542. Berkeley AS, Hayworth SD, Hirsch JC, Freedman KS, Ledger WJ. Controlled, comparative study of moxalactam and cefazolin for prophylaxis of abdominal hysterectomy. Surg Gynecol Obstet. 1985;161(5):457-61.

543. Tuomala RE, Fischer SG, Muñoz A, Souney PF, Steele L, Polk BF. A comparative trial of cefazolin and moxalactam as prophylaxis for preventing infection after abdominal hysterectomy. Obstet Gynecol. 1985;66(3):372-6.

544. Hemsell DL, Johnson ER, Hemsell PG, Nobles BJ, Little BB, Heard MC. Cefazolin is inferior to cefotetan as single-dose prophylaxis for women undergoing elective total abdominal hysterectomy. Clin Infect Dis. 1995;20(3):677-84.

545. Eckenhausen FW, Jonker PL. Antibiotic prophylaxis in abdominal hysterectomy, with special reference to the duration of the prophylaxis. Pharm Weekbl Sci. 1990;12(6A):289-91.

546. Lett WJ, Ansbacher R, Davison BL, Otterson WN. Prophylactic antibiotics for women undergoing vaginal hysterectomy. J Reprod Med. 1977;19(2):51-4.

547. Triolo O, Mancuso A, Pantano F. Amoxycillin/clavulanate prophylaxis in gynecologic surgery. Int J Gynaecol Obstet. 2004;85(1):59-61.

548. ACOG Committee on Practice Bulletins--Gynecology. ACOG practice bulletin No. 104: antibiotic prophylaxis for gynecologic procedures. Obstet Gynecol. 2009;113(5):1180-9.

549. Kocak I, Ustün C, Emre B, Uzel A. Antibiotics prophylaxis in laparoscopy. Ceska Gynekol. 2005;70(4):269-72.

550. Gonik B, Lynn SC, Katz AR, Ross PJ, Weatherford R. Complications of laparoscopic sterilization. J Reprod Med. 1982;27(8):471-3.

551. Kapp N, Whyte P, Tang J, Jackson E, Brahmi D. A review of evidence for safe abortion care. Contraception. 2013;88(3):350-63.

552. Low N, Mueller M, Van Vliet HAAM, Kapp N. Perioperative antibiotics to prevent infection after first-trimester abortion. Cochrane Database Syst Rev. 2012;(3):CD005217.

553. Achilles SL, Reeves MF, Society of Family Planning. Prevention of infection after induced abortion: release date October 2010: SFP guideline 20102. Contraception. 2011;83(4):295-309.

554. Penney GC, Thomson M, Norman J, McKenzie H, Vale L, Smith R, et al. A randomised comparison of strategies for reducing infective complications of induced abortion. Br J Obstet Gynaecol. 1998;105(6):599-604.

555. The Care of Women Requesting Induced Abortion (Evidence-based Clinical Guideline No. 7) [Internet]. Royal College of Obstetricians &amp; Gynaecologists. [citado 8 de octubre de 2019]. Disponible en: https://www.rcog.org.uk/en/guidelines-research-services/guidelines/the-care-of-women-requesting-induced-abortion/

556. Duggal N, Mercado C, Daniels K, Bujor A, Caughey AB, El-Sayed YY. Antibiotic prophylaxis for prevention of postpartum perineal wound complications: a randomized controlled trial. Obstet Gynecol. 2008;111(6):1268-73.

557. Capocasale E, De Vecchi E, Mazzoni MP, Dalla Valle R, Pellegrino C, Ferretti S, et al. Surgical site and early urinary tract infections in 1000 kidney transplants with antimicrobial perioperative prophylaxis. Transplant Proc. 2014;46(10):3455-8.

558. Cohen J, Rees AJ, Williams G. A prospective randomized controlled trial of perioperative antibiotic prophylaxis in renal transplantation. J Hosp Infect. 1988;11(4):357-63.

559. Orlando G, Manzia TM, Sorge R, Iaria G, Angelico R, Sforza D, et al. One-shot versus multidose perioperative antibiotic prophylaxis after kidney transplantation: a randomized, controlled clinical trial. Surgery. 2015;157(1):104-10.

560. Ramos A, Asensio A, Muñez E, Torre-Cisneros J, Montejo M, Aguado JM, et al. Incisional surgical site infection in kidney transplantation. Urology. 2008;72(1):119-23.

561. Pfundstein J, Roghmann MC, Schwalbe RS, Qaiyumi SQ, McCarter RJ, Keay S, et al. A randomized trial of surgical antimicrobial prophylaxis with and without vancomycin in organ transplant patients. Clin Transplant. 1999;13(3):245-52.

562. Green H, Rahamimov R, Gafter U, Leibovitci L, Paul M. Antibiotic prophylaxis for urinary tract infections in renal transplant recipients: a systematic review and meta-analysis. Transpl Infect Dis. 2011;13(5):441-7.

563. Wszoła M, Kwiatkowski A, Ostaszewska A, Górski L, Kuthan R, Sawicka-Grzelak A, et al. Surgical site infections after kidney transplantation--where do we stand now? Transplantation. 2013;95(6):878-82.

564. Freire MP, Antonopoulos IM, Piovesan AC, Moura ML, de Paula FJ, Spadão F, et al. Amikacin prophylaxis and risk factors for surgical site infection after kidney transplantation. Transplantation. 2015;99(3):521-7.

565. Pappas PG, Silveira FP, AST Infectious Diseases Community of Practice. *Candida* in solid organ transplant recipients. Am J Transplant. 2009;9 Suppl 4:S173-179.

566. Kawecki D, Kwiatkowski A, Michalak G, Sawicka-Grzelak A, Mlynarczyk A, Sokol-Leszczynska B, et al. Surgical site infections in the early posttransplant period after simultaneous pancreas-kidney transplantation. Transplant Proc. 2009;41(8):3143-7.

567. Michalak G, Kwiatkowski A, Bieniasz M, Meszaros J, Czerwinski J, Wszola M, et al. Infectious complications after simultaneous pancreas-kidney transplantation. Transplant Proc. 2005;37(8):3560-3.

568. Berger N, Wirmsberger R, Kafka R, Margreiter C, Ebenbichler C, Stelzmueller I, et al. Infectious complications following 72 consecutive enteric-drained pancreas transplants. Transpl Int. 2006;19(7):549-57.

569. Smets YF, van der Pijl JW, van Dissel JT, Ringers J, de Fijter JW, Lemkes HH. Infectious disease complications of simultaneous pancreas kidney transplantation. Nephrol Dial Transplant. 1997;12(4):764-71.

570. Barone GW, Hudec WA, Sailors DM, Ketel BL. Prophylactic wound antibiotics for combined kidney and pancreas transplants. Clin Transplant. 1996;10(4):386-8.

571. Benedetti E, Gruessner AC, Troppmann C, Papalois BE, Sutherland DE, Dunn DL, et al. Intra-abdominal fungal infections after pancreatic transplantation: incidence, treatment, and outcome. J Am Coll Surg. 1996;183(4):307-16.

572. Freise CE, Stock PG, Roberts JP, Melzer JS. Low postoperative wound infection rates are possible following simultaneous pancreas-kidney transplantation. Transplant Proc. 1995;27(6):3069-70.

573. Global Observatory on Donation & Transplantation [Internet]. Global Observatory on Donation & Transplantation. [citado 12 de febrero de 2019]. Disponible en: http://www.transplant-observatory.org/

574. Safdar N, Said A, Lucey MR. The role of selective digestive decontamination for reducing infection in patients undergoing liver transplantation: a systematic review and meta-analysis. Liver Transpl. 2004;10(7):817-27.

575. Anesi JA, Blumberg EA, Abbo LM. Perioperative Antibiotic Prophylaxis to Prevent Surgical Site Infections in Solid Organ Transplantation. Transplantation. 2018;102(1):21-34.

576. Asensio A, Ramos A, Cuervas-Mons V, Cordero E, Sánchez-Turrión V, Blanes M, et al. Effect of antibiotic prophylaxis on the risk of surgical site infection in orthotopic liver transplant. Liver Transpl. 2008;14(6):799-805.

577. Vandecasteele E, De Waele J, Vandijck D, Blot S, Vogelaers D, Rogiers X, et al. Antimicrobial prophylaxis in liver transplant patients--a multicenter survey endorsed by the European Liver and Intestine Transplant Association. Transpl Int. 2010;23(2):182-90.

578. Fishman JA. Infection in solid-organ transplant recipients. N Engl J Med. 2007;357(25):2601-14.

579. Hellinger WC, Crook JE, Heckman MG, Diehl NN, Shalev JA, Zubair AC, et al. Surgical site infection after liver transplantation: risk factors and association with graft loss or death. Transplantation. 2009;87(9):1387-93.

580. Kawecki D, Pacholczyk M, Lagiewska B, Sawicka-Grzelak A, Durlik M, Mlynarczyk G, et al. Bacterial and fungal infections in the early post-transplantation period after liver transplantation: etiologic agents and their susceptibility. Transplant Proc. 2014;46(8):2777-81.

581. Hadley S, Samore MH, Lewis WD, Jenkins RL, Karchmer AW, Hammer SM. Major infectious complications after orthotopic liver transplantation and comparison of outcomes in patients receiving cyclosporine or FK506 as primary immunosuppression. Transplantation. 1995;59(6):851-9.

582. Calandra T, Marchetti O. Clinical trials of antifungal prophylaxis among patients undergoing surgery. Clin Infect Dis. 2004;39 Suppl 4:S185-192.

583. Lau AF, Kabir M, Chen SC-A, Playford EG, Marriott DJ, Jones M, et al. *Candida* colonization as a risk marker for invasive candidiasis in mixed medical-surgical intensive care units: development and evaluation of a simple, standard protocol. J Clin Microbiol. 2015;53(4):1324-30.

584. Soave R. Prophylaxis strategies for solid-organ transplantation. Clin Infect Dis. 2001;33 Suppl 1:S26-31.

585. Cai J. Thoracic transplantation in the United States: an analysis of UNOS Registry data. Clin Transpl. 2006;41-56.

586. Fong IW, Baker CB, McKee DC. The value of prophylactic antibiotics in aorat-coronary bypass operations: a double-blind randomized trial. J Thorac Cardiovasc Surg. 1979;78(6):908-13.

587. Filsoufi F, Rahmanian PB, Castillo JG, Pinney S, Broumand SR, Adams DH. Incidence, treatment strategies and outcome of deep sternal wound infection after orthotopic heart transplantation. J Heart Lung Transplant. 2007;26(11):1084-90.

588. van de Beek D, Kremers WK, Del Pozo JL, Daly RC, Edwards BS, McGregor CGA, et al. Effect of infectious diseases on outcome after heart transplant. Mayo Clin Proc. 2008;83(3):304-8.

589. Khaghani A, Martin M, Fitzgerald M, Skacel M, Aravot D, Yacoub MH. Cefotaxime and flucloxacillin as antibiotic prophylaxis in cardiac transplantation. Drugs. 1988;35 Suppl 2:124-6.

590. Petri WA. Infections in heart transplant recipients. Clin Infect Dis. 1994;18(2):141-6; Quiz 147-148.

591. Carrier M, Perrault LP, Pellerin M, Marchand R, Auger P, Pelletier GB, et al. Sternal wound infection after heart transplantation: incidence and results with aggressive surgical treatment. Ann Thorac Surg. 2001;72(3):719-23; discussion 723-724.

592. Mattner F, Fischer S, Weissbrodt H, Chaberny IF, Sohr D, Gottlieb J, et al. Post-operative nosocomial infections after lung and heart transplantation. J Heart Lung Transplant. 2007;26(3):241-9.

593. Helmi M, Love RB, Welter D, Cornwell RD, Meyer KC. Aspergillus infection in lung transplant recipients with cystic fibrosis: risk factors and outcomes comparison to other types of transplant recipients. Chest. 2003;123(3):800-8.

594. Deusch E, End A, Grimm M, Graninger W, Klepetko W, Wolner E. Early bacterial infections in lung transplant recipients. Chest. 1993;104(5):1412-6.

595. Campos S, Caramori M, Teixeira R, Afonso J, Carraro R, Strabelli T, et al. Bacterial and fungal pneumonias after lung transplantation. Transplant Proc. 2008;40(3):822-4.

596. Abid Q, Nkere UU, Hasan A, Gould K, Forty J, Corris P, et al. Mediastinitis in heart and lung transplantation: 15 years experience. Ann Thorac Surg. 2003;75(5):1565-71.

597. Trulock EP. Lung transplantation. Am J Respir Crit Care Med. 1997;155(3):789-818.
